# Supplementary material for: Zika, chikungunya and co-occurrence in Brazil: space-time clusters and associated environmental–socioeconomic factors
Source: Sci Rep. 2023 Oct 21;13:18026. doi: 10.1038/s41598-023-42930-4 (PMC10590386; doi:10.1038/s41598-023-42930-4)
Supplement: Supplementary file 2 — Supplementary Tables. [file 41598_2023_42930_MOESM2_ESM.xlsx]

## Sheet: dictionary
	Dictionary
	Table S1a to rates
	Variable	Description
	COD_MUN6	Municipality of residence id, Official 6-digit code defined by IBGE for the municipality
	NM_MUN	Municipality of residence name
	SIGLA_UF	Federation of residence unit abbreviation
	pop18	2018 resident population by IBGE
	nchik_cases	Cases numbers of chikungunya (2015-2021) *all classification: Autochthonous; imported; opened; undetermined.
	nchik_deaths	Cases deaths of chikungunya (2015-2021) *all classification: Autochthonous; imported; opened; undetermined.
	rate_inc_ck	Chikungunya incidence rates per 100,000 inhabitants-year ((nchik_cases/pop18)/7 year * 100,000)
	rate_mort_ck	Chikungunya mortality rates per 100,000 inhabitants-year ((nchik_deaths/pop18)/7 year * 100,000)
	nzik_cases	Cases numbers of Zika (2015-2021) *all classification: Autochthonous; imported; opened; undetermined.
	nzik_deaths	Cases deaths of Zika (2015-2021) *all classification: Autochthonous; imported; opened; undetermined.
	rate_inc_zk	Zika incidence rates per 100,000 inhabitants-year ((nzik_cases/pop18)/7 year * 100,000)
	rate_mort_zk	Zika mortality rates per 100,000 inhabitants-year ((nzik_deaths/pop18)/7 year * 100,000)
	NM_REGIAO	Name of the Brazilian region
	Table S1b to chikunguya
	Variable	Description
	ID_MN_RESI	Municipality of residence id, Official 6-digit code defined by IBGE for the municipality
	FxEt	Age group (0to4, 5to9, 10to14,15to19, 20to29, 30to39, 40to49, 50to59, 60to69, 70to79, and >= 80 years old)
	data	Symptoms onset date (day/month/year)
	Sexo	Sex (F: female; M: male) *cases with no information on sex were excluded from the scan analyses in this study.
	Classification	Autochthonous; opened; undetermined *Imported cases were excluded from the scan analyses in this study.
	n	Event number
	Table S1c to Zika
	Variable	Description
	ID_MN_RESI	Municipality of residence id, Official 6-digit code defined by IBGE for the municipality
	FxEt	Age group (0to4, 5to9, 10to14,15to19, 20to29, 30to39, 40to49, 50to59, 60to69, 70to79, and >= 80 years old)
	data	Symptoms onset date (day/month/year)
	Sexo	Sex (F: female; M: male) *cases with no information on sex were excluded from the scan analyses in this study.
	Classification	autochthonous; opened; undetermined *Imported cases were excluded from the scan analyses in this study.
	n	Event number

## Sheet: Table S1a - rates
COD_MUN6	NM_MUN	SIGLA_UF	pop18	nchik_cases	nchik_deaths	rate_inc_ck	rate_mort_ck	nzik_cases	nzik_deaths	rate_inc_Zk	rate_mort_zk	NM_REGIAO
110001	Alta Floresta D'Oeste	RO	23167	2	0	1.233	0	2	0	1.233	0	North
110002	Ariquemes	RO	106168	25	0	3.364	0	41	0	5.517	0	North
110003	Cabixi	RO	5438	1	0	2.627	0	1	0	2.627	0	North
110004	Cacoal	RO	84813	36	0	6.064	0	16	0	2.695	0	North
110005	Cerejeiras	RO	16444	16	0	13.9	0	26	0	22.587	0	North
110006	Colorado do Oeste	RO	16227	15	0	13.206	0	5	0	4.402	0	North
110007	Corumbiara	RO	7567	1	0	1.888	0	0	0	0	0	North
110008	Costa Marques	RO	17855	0	0	0	0	0	0	0	0	North
110009	Espigão D'Oeste	RO	32047	0	0	0	0	8	0	3.566	0	North
110010	Guajará-Mirim	RO	45783	5	0	1.56	0	3	0	0.936	0	North
110011	Jaru	RO	51933	11	0	3.026	0	6	0	1.65	0	North
110012	Ji-Paraná	RO	127907	29	0	3.239	0	49	0	5.473	0	North
110013	Machadinho D'Oeste	RO	39097	0	0	0	0	1	0	0.365	0	North
110014	Nova Brasilândia D'Oeste	RO	20459	0	0	0	0	2	0	1.397	0	North
110015	Ouro Preto do Oeste	RO	36340	5	0	1.966	0	5	0	1.966	0	North
110018	Pimenta Bueno	RO	36434	3	0	1.176	0	6	0	2.353	0	North
110020	Porto Velho	RO	519531	185	0	5.087	0	293	1	8.057	0.275	North
110025	Presidente Médici	RO	19409	35	0	25.761	0	26	0	19.137	0	North
110026	Rio Crespo	RO	3723	0	0	0	0	0	0	0	0	North
110028	Rolim de Moura	RO	54702	3	0	0.783	0	5	0	1.306	0	North
110029	Santa Luzia D'Oeste	RO	6781	3	0	6.32	0	2	0	4.213	0	North
110030	Vilhena	RO	97448	30	0	4.398	0	328	0	48.084	0	North
110032	São Miguel do Guaporé	RO	22931	2	0	1.246	0	0	0	0	0	North
110033	Nova Mamoré	RO	29757	2	0	0.96	0	0	0	0	0	North
110034	Alvorada D'Oeste	RO	14722	0	0	0	0	0	0	0	0	North
110037	Alto Alegre dos Parecis	RO	13227	10	0	10.8	0	2	0	2.16	0	North
110040	Alto Paraíso	RO	20999	4	0	2.721	0	0	0	0	0	North
110045	Buritis	RO	38937	0	0	0	0	0	0	0	0	North
110050	Novo Horizonte do Oeste	RO	8751	0	0	0	0	0	0	0	0	North
110060	Cacaulândia	RO	6190	0	0	0	0	0	0	0	0	North
110070	Campo Novo de Rondônia	RO	14009	0	0	0	0	0	0	0	0	North
110080	Candeias do Jamari	RO	25983	7	0	3.849	0	3	0	1.649	0	North
110090	Castanheiras	RO	3119	0	0	0	0	0	0	0	0	North
110092	Chupinguaia	RO	10886	1	0	1.312	0	16	0	20.997	0	North
110094	Cujubim	RO	24226	1	0	0.59	0	1	0	0.59	0	North
110100	Governador Jorge Teixeira	RO	8095	1	0	1.765	0	0	0	0	0	North
110110	Itapuã do Oeste	RO	10272	3	0	4.172	0	2	0	2.781	0	North
110120	Ministro Andreazza	RO	9762	1	0	1.463	0	4	0	5.854	0	North
110130	Mirante da Serra	RO	11080	0	0	0	0	0	0	0	0	North
110140	Monte Negro	RO	15695	1	0	0.91	0	0	0	0	0	North
110143	Nova União	RO	7047	4	0	8.109	0	0	0	0	0	North
110145	Parecis	RO	5947	6	0	14.413	0	3	0	7.207	0	North
110146	Pimenteiras do Oeste	RO	2191	14	0	91.283	0	0	0	0	0	North
110147	Primavera de Rondônia	RO	2939	4	0	19.443	0	0	0	0	0	North
110148	São Felipe D'Oeste	RO	5280	0	0	0	0	0	0	0	0	North
110149	São Francisco do Guaporé	RO	19842	1	0	0.72	0	1	0	0.72	0	North
110150	Seringueiras	RO	11860	1	0	1.205	0	0	0	0	0	North
110155	Teixeirópolis	RO	4384	2	0	6.517	0	0	0	0	0	North
110160	Theobroma	RO	10494	1	0	1.361	0	1	0	1.361	0	North
110170	Urupá	RO	11665	4	0	4.899	0	1	0	1.225	0	North
110175	Vale do Anari	RO	11028	0	0	0	0	0	0	0	0	North
110180	Vale do Paraíso	RO	6998	2	0	4.083	0	0	0	0	0	North
120001	Acrelândia	AC	15020	1	0	0.951	0	0	0	0	0	North
120005	Assis Brasil	AC	7300	3	0	5.871	0	0	0	0	0	North
120010	Brasiléia	AC	25848	17	0	9.396	0	2	0	1.105	0	North
120013	Bujari	AC	10111	4	0	5.652	0	0	0	0	0	North
120017	Capixaba	AC	11456	1	0	1.247	0	0	0	0	0	North
120020	Cruzeiro do Sul	AC	87673	109	0	17.761	0	100	0	16.294	0	North
120025	Epitaciolândia	AC	18122	82	0	64.641	0	3	0	2.365	0	North
120030	Feijó	AC	34675	3	0	1.236	0	15	0	6.18	0	North
120032	Jordão	AC	8159	0	0	0	0	0	0	0	0	North
120033	Mâncio Lima	AC	18638	95	0	72.816	0	118	0	90.445	0	North
120034	Manoel Urbano	AC	9336	2	0	3.06	0	0	0	0	0	North
120035	Marechal Thaumaturgo	AC	18430	2	0	1.55	0	1	0	0.775	0	North
120038	Plácido de Castro	AC	19565	1	0	0.73	0	0	0	0	0	North
120039	Porto Walter	AC	11720	2	0	2.438	0	0	0	0	0	North
120040	Rio Branco	AC	401155	238	0	8.476	0	146	0	5.199	0	North
120042	Rodrigues Alves	AC	18504	9	0	6.948	0	4	0	3.088	0	North
120043	Santa Rosa do Purus	AC	6362	0	0	0	0	0	0	0	0	North
120045	Senador Guiomard	AC	22810	1	0	0.626	0	0	0	0	0	North
120050	Sena Madureira	AC	45177	1	0	0.316	0	0	0	0	0	North
120060	Tarauacá	AC	41976	166	0	56.495	0	123	0	41.861	0	North
120070	Xapuri	AC	19048	6	0	4.5	0	2	0	1.5	0	North
120080	Porto Acre	AC	18180	2	0	1.572	0	7	0	5.501	0	North
130002	Alvarães	AM	15860	1	0	0.901	0	0	0	0	0	North
130006	Amaturá	AM	11332	0	0	0	0	0	0	0	0	North
130008	Anamã	AM	13269	0	0	0	0	1	0	1.077	0	North
130010	Anori	AM	20538	0	0	0	0	0	0	0	0	North
130014	Apuí	AM	21583	0	0	0	0	0	0	0	0	North
130020	Atalaia do North	AM	19438	0	0	0	0	0	0	0	0	North
130030	Autazes	AM	38830	0	0	0	0	1	0	0.368	0	North
130040	Barcelos	AM	27364	7	0	3.654	0	2	0	1.044	0	North
130050	Barreirinha	AM	31593	0	0	0	0	0	0	0	0	North
130060	Benjamin Constant	AM	42020	0	0	0	0	0	0	0	0	North
130063	Beruri	AM	19258	6	0	4.451	0	1	0	0.742	0	North
130068	Boa Vista do Ramos	AM	18781	0	0	0	0	0	0	0	0	North
130070	Boca do Acre	AM	33976	0	0	0	0	0	0	0	0	North
130080	Borba	AM	40565	32	0	11.269	0	15	0	5.283	0	North
130083	Caapiranga	AM	12877	1	0	1.109	0	0	0	0	0	North
130090	Canutama	AM	15450	0	0	0	0	0	0	0	0	North
130100	Carauari	AM	28076	0	0	0	0	0	0	0	0	North
130110	Careiro	AM	37384	0	0	0	0	2	0	0.764	0	North
130115	Careiro da Várzea	AM	29595	0	0	0	0	0	0	0	0	North
130120	Coari	AM	84272	2	0	0.339	0	2	0	0.339	0	North
130130	Codajás	AM	28100	1	0	0.508	0	1	0	0.508	0	North
130140	Eirunepé	AM	34840	2	0	0.82	0	3	0	1.23	0	North
130150	Envira	AM	19668	0	0	0	0	0	0	0	0	North
130160	Fonte Boa	AM	18221	1	0	0.784	0	0	0	0	0	North
130165	Guajará	AM	16416	0	0	0	0	0	0	0	0	North
130170	Humaitá	AM	54001	7	0	1.852	0	1	0	0.265	0	North
130180	Ipixuna	AM	28933	0	0	0	0	0	0	0	0	North
130185	Iranduba	AM	47571	7	0	2.102	0	39	0	11.712	0	North
130190	Itacoatiara	AM	99955	2	0	0.286	0	11	0	1.572	0	North
130195	Itamarati	AM	7888	0	0	0	0	0	0	0	0	North
130200	Itapiranga	AM	9064	0	0	0	0	0	0	0	0	North
130210	Japurá	AM	3265	0	0	0	0	0	0	0	0	North
130220	Juruá	AM	14312	0	0	0	0	0	0	0	0	North
130230	Jutaí	AM	14753	1	0	0.968	0	0	0	0	0	North
130240	Lábrea	AM	45245	0	0	0	0	1	0	0.316	0	North
130250	Manacapuru	AM	96236	7	0	1.039	0	6	0	0.891	0	North
130255	Manaquiri	AM	31147	0	0	0	0	0	0	0	0	North
130260	Manaus	AM	2145444	352	0	2.344	0	4993	0	33.247	0	North
130270	Manicoré	AM	54907	0	0	0	0	0	0	0	0	North
130280	Maraã	AM	18186	0	0	0	0	0	0	0	0	North
130290	Maués	AM	62755	0	0	0	0	1	0	0.228	0	North
130300	Nhamundá	AM	20899	0	0	0	0	0	0	0	0	North
130310	Nova Olinda do North	AM	36721	0	0	0	0	0	0	0	0	North
130320	Novo Airão	AM	18974	5	0	3.765	0	18	0	13.552	0	North
130330	Novo Aripuanã	AM	25237	1	0	0.566	0	0	0	0	0	North
130340	Parintins	AM	113168	5	0	0.631	0	2	0	0.252	0	North
130350	Pauini	AM	19329	1	0	0.739	0	0	0	0	0	North
130353	Presidente Figueiredo	AM	35352	14	0	5.657	0	4	0	1.616	0	North
130356	Rio Preto da Eva	AM	32577	1	0	0.439	0	1	0	0.439	0	North
130360	Santa Isabel do Rio Negro	AM	24436	0	0	0	0	0	0	0	0	North
130370	Santo Antônio do Içá	AM	21966	0	0	0	0	0	0	0	0	North
130380	São Gabriel da Cachoeira	AM	44816	4	0	1.275	0	2	0	0.638	0	North
130390	São Paulo de Olivença	AM	38515	0	0	0	0	1	0	0.371	0	North
130395	São Sebastião do Uatumã	AM	13685	0	0	0	0	0	0	0	0	North
130400	Silves	AM	9110	0	0	0	0	0	0	0	0	North
130406	Tabatinga	AM	64488	8	0	1.772	0	1	0	0.222	0	North
130410	Tapauá	AM	17299	8	0	6.606	0	19	0	15.69	0	North
130420	Tefé	AM	60154	39	0	9.262	0	24	0	5.7	0	North
130423	Tonantins	AM	18610	0	0	0	0	0	0	0	0	North
130426	Uarini	AM	13387	0	0	0	0	0	0	0	0	North
130430	Urucará	AM	16383	0	0	0	0	0	0	0	0	North
130440	Urucurituba	AM	22537	0	0	0	0	0	0	0	0	North
140002	Amajari	RR	12394	7	0	8.068	0	0	0	0	0	North
140005	Alto Alegre	RR	15638	16	0	14.616	0	0	0	0	0	North
140010	Boa Vista	RR	375374	3802	0	144.694	0	362	2	13.777	0.761	North
140015	Bonfim	RR	12257	18	0	20.979	0	3	0	3.497	0	North
140017	Cantá	RR	17868	13	0	10.394	0	0	0	0	0	North
140020	Caracaraí	RR	21564	16	0	10.6	0	0	0	0	0	North
140023	Caroebe	RR	9950	4	0	5.743	0	5	0	7.179	0	North
140028	Iracema	RR	11600	4	0	4.926	0	1	0	1.232	0	North
140030	Mucajaí	RR	17528	80	0	65.202	0	26	0	21.191	0	North
140040	Normandia	RR	11045	1	0	1.293	0	3	0	3.88	0	North
140045	Pacaraima	RR	15580	8	0	7.335	0	0	0	0	0	North
140047	Rorainópolis	RR	29533	93	0	44.986	0	6	0	2.902	0	North
140050	São João da Baliza	RR	8052	28	0	49.677	0	16	0	28.387	0	North
140060	São Luiz	RR	7860	5	0	9.088	0	3	0	5.453	0	North
140070	Uiramutã	RR	10325	7	0	9.685	0	1	0	1.384	0	North
150010	Abaetetuba	PA	156292	84	0	7.678	0	5	0	0.457	0	North
150013	Abel Figueiredo	PA	7382	149	0	288.346	0	1	0	1.935	0	North
150020	Acará	PA	55513	3	0	0.772	0	7	0	1.801	0	North
150030	Afuá	PA	38863	5	0	1.838	0	113	0	41.538	0	North
150034	Água Azul do North	PA	27241	1	0	0.524	0	0	0	0	0	North
150040	Alenquer	PA	56480	2	0	0.506	0	1	0	0.253	0	North
150050	Almeirim	PA	34142	2	0	0.837	0	0	0	0	0	North
150060	Altamira	PA	113195	39	0	4.922	0	2	0	0.252	0	North
150070	Anajás	PA	28859	0	0	0	0	1	0	0.495	0	North
150080	Ananindeua	PA	525566	1078	0	29.302	0	127	0	3.452	0	North
150085	Anapu	PA	27161	19	0	9.993	0	0	0	0	0	North
150090	Augusto Corrêa	PA	45516	7	0	2.197	0	1	0	0.314	0	North
150095	Aurora do Pará	PA	30896	0	0	0	0	0	0	0	0	North
150100	Aveiro	PA	16371	0	0	0	0	0	0	0	0	North
150110	Bagre	PA	30009	0	0	0	0	1	0	0.476	0	North
150120	Baião	PA	46416	1	0	0.308	0	0	0	0	0	North
150125	Bannach	PA	3310	0	0	0	0	49	0	211.48	0	North
150130	Barcarena	PA	122294	118	0	13.784	0	20	0	2.336	0	North
150140	Belém	PA	1485732	5938	1	57.095	0.096	2138	0	20.557	0	North
150145	Belterra	PA	17624	1	0	0.811	0	1	0	0.811	0	North
150150	Benevides	PA	61689	83	0	19.221	0	34	0	7.874	0	North
150157	Bom Jesus do Tocantins	PA	16841	0	0	0	0	0	0	0	0	North
150160	Bonito	PA	16038	4	0	3.563	0	1	0	0.891	0	North
150170	Bragança	PA	126436	182	0	20.564	0	0	0	0	0	North
150172	Brasil Novo	PA	15190	1	0	0.94	0	0	0	0	0	North
150175	Brejo Grande do Araguaia	PA	7392	0	0	0	0	1	0	1.933	0	North
150178	Breu Branco	PA	64738	7	0	1.545	0	0	0	0	0	North
150180	Breves	PA	101891	10	0	1.402	0	1	0	0.14	0	North
150190	Bujaru	PA	28832	3	0	1.486	0	2	0	0.991	0	North
150195	Cachoeira do Piriá	PA	33178	1	0	0.431	0	0	0	0	0	North
150200	Cachoeira do Arari	PA	23466	0	0	0	0	0	0	0	0	North
150210	Cametá	PA	136390	58	0	6.075	0	7	0	0.733	0	North
150215	Canaã dos Carajás	PA	36050	248	0	98.276	0	38	0	15.058	0	North
150220	Capanema	PA	68616	283	0	58.92	0	2	0	0.416	0	North
150230	Capitão Poço	PA	54179	9	0	2.373	0	0	0	0	0	North
150240	Castanhal	PA	198294	265	0	19.091	0	20	0	1.441	0	North
150250	Chaves	PA	23482	0	0	0	0	0	0	0	0	North
150260	Colares	PA	12040	1	0	1.187	0	1	0	1.187	0	North
150270	Conceição do Araguaia	PA	47734	32	1	9.577	2.993	13	0	3.891	0	North
150275	Concórdia do Pará	PA	32847	6	0	2.61	0	2	0	0.87	0	North
150276	Cumaru do North	PA	13179	1	0	1.084	0	0	0	0	0	North
150277	Curionópolis	PA	18014	72	0	57.098	0	41	0	32.514	0	North
150280	Curralinho	PA	33893	0	0	0	0	0	0	0	0	North
150285	Curuá	PA	14197	0	0	0	0	0	0	0	0	North
150290	Curuçá	PA	39540	7	0	2.529	0	1	0	0.361	0	North
150293	Dom Eliseu	PA	58956	104	0	25.2	0	5	0	1.212	0	North
150295	Eldorado do Carajás	PA	33674	17	0	7.212	0	36	0	15.272	0	North
150300	Faro	PA	7319	0	0	0	0	0	0	0	0	North
150304	Floresta do Araguaia	PA	20080	2	0	1.423	0	1	0	0.711	0	North
150307	Garrafão do North	PA	26020	1	0	0.549	0	1	0	0.549	0	North
150309	Goianésia do Pará	PA	39857	0	0	0	0	1	0	0.358	0	North
150310	Gurupá	PA	32991	2	0	0.866	0	0	0	0	0	North
150320	Igarapé-Açu	PA	38588	29	0	10.736	0	0	0	0	0	North
150330	Igarapé-Miri	PA	62355	24	0	5.498	0	1	0	0.229	0	North
150340	Inhangapi	PA	11559	5	0	6.179	0	0	0	0	0	North
150345	Ipixuna do Pará	PA	62455	37	0	8.463	0	2	0	0.457	0	North
150350	Irituia	PA	32504	1	0	0.44	0	0	0	0	0	North
150360	Itaituba	PA	101097	2	0	0.283	0	5	0	0.707	0	North
150370	Itupiranga	PA	53182	235	0	63.126	0	2	0	0.537	0	North
150375	Jacareacanga	PA	8899	1	0	1.605	0	1	0	1.605	0	North
150380	Jacundá	PA	58457	51	0	12.463	0	73	0	17.84	0	North
150390	Juruti	PA	56908	4	0	1.004	0	0	0	0	0	North
150400	Limoeiro do Ajuru	PA	28583	10	0	4.998	0	1	0	0.5	0	North
150405	Mãe do Rio	PA	29917	97	0	46.319	0	0	0	0	0	North
150410	Magalhães Barata	PA	8523	6	0	10.057	0	0	0	0	0	North
150420	Marabá	PA	275086	297	0	15.424	0	14	0	0.727	0	North
150430	Maracanã	PA	29429	98	0	47.572	0	1	0	0.485	0	North
150440	Marapanim	PA	28220	221	0	111.876	0	1	0	0.506	0	North
150442	Marituba	PA	129321	2189	0	241.812	0	212	0	23.419	0	North
150445	Medicilândia	PA	31213	0	0	0	0	1	0	0.458	0	North
150450	Melgaço	PA	27415	0	0	0	0	0	0	0	0	North
150460	Mocajuba	PA	30736	12	0	5.577	0	3	0	1.394	0	North
150470	Moju	PA	80988	11	0	1.94	0	1	0	0.176	0	North
150475	Mojuí dos Campos	PA	15982	5	0	4.469	0	0	0	0	0	North
150480	Monte Alegre	PA	57900	1	0	0.247	0	2	0	0.493	0	North
150490	Muaná	PA	39783	3	0	1.077	0	1	0	0.359	0	North
150495	Nova Esperança do Piriá	PA	21291	1	0	0.671	0	0	0	0	0	North
150497	Nova Ipixuna	PA	16499	1	0	0.866	0	1	0	0.866	0	North
150500	Nova Timboteua	PA	15218	4	0	3.755	0	0	0	0	0	North
150503	Novo Progresso	PA	25758	7	0	3.882	0	0	0	0	0	North
150506	Novo Repartimento	PA	74602	6	0	1.149	0	0	0	0	0	North
150510	Óbidos	PA	51964	3	0	0.825	0	1	0	0.275	0	North
150520	Oeiras do Pará	PA	32168	0	0	0	0	1	0	0.444	0	North
150530	Oriximiná	PA	72160	2	0	0.396	0	0	0	0	0	North
150540	Ourém	PA	17721	0	0	0	0	0	0	0	0	North
150543	Ourilândia do North	PA	32319	39	0	17.239	0	29	0	12.819	0	North
150548	Pacajá	PA	46986	55	0	16.722	0	0	0	0	0	North
150549	Palestina do Pará	PA	7596	3	0	5.642	0	0	0	0	0	North
150550	Paragominas	PA	111764	282	0	36.045	0	1	0	0.128	0	North
150553	Parauapebas	PA	202882	1689	0	118.929	0	55	0	3.873	0	North
150555	Pau D'Arco	PA	5557	6	0	15.425	0	1	0	2.571	0	North
150560	Peixe-Boi	PA	8073	1	0	1.77	0	0	0	0	0	North
150563	Piçarra	PA	12983	0	0	0	0	0	0	0	0	North
150565	Placas	PA	30293	0	0	0	0	0	0	0	0	North
150570	Ponta de Pedras	PA	30608	2	0	0.933	0	0	0	0	0	North
150580	Portel	PA	61126	8	0	1.87	0	0	0	0	0	North
150590	Porto de Moz	PA	40458	0	0	0	0	0	0	0	0	North
150600	Prainha	PA	29886	0	0	0	0	89	0	42.543	0	North
150610	Primavera	PA	10792	17	0	22.503	0	2	0	2.647	0	North
150611	Quatipuru	PA	13512	1	0	1.057	0	1	0	1.057	0	North
150613	Redenção	PA	83997	96	1	16.327	1.701	11	0	1.871	0	North
150616	Rio Maria	PA	18186	57	0	44.775	0	211	0	165.748	0	North
150618	Rondon do Pará	PA	51903	140	0	38.533	0	13	0	3.578	0	North
150619	Rurópolis	PA	49503	4	0	1.154	0	0	0	0	0	North
150620	Salinópolis	PA	40424	95	0	33.573	0	8	0	2.827	0	North
150630	Salvaterra	PA	23424	6	0	3.659	0	0	0	0	0	North
150635	Santa Bárbara do Pará	PA	20704	23	0	15.87	0	3	0	2.07	0	North
150640	Santa Cruz do Arari	PA	9939	0	0	0	0	0	0	0	0	North
150650	Santa Izabel do Pará	PA	69746	110	0	22.531	0	2	0	0.41	0	North
150655	Santa Luzia do Pará	PA	19852	3	0	2.159	0	0	0	0	0	North
150658	Santa Maria das Barreiras	PA	21042	0	0	0	0	0	0	0	0	North
150660	Santa Maria do Pará	PA	24725	0	0	0	0	0	0	0	0	North
150670	Santana do Araguaia	PA	71187	4	0	0.803	0	4	0	0.803	0	North
150680	Santarém	PA	302667	93	0	4.39	0	95	0	4.484	0	North
150690	Santarém Novo	PA	6664	68	0	145.773	0	0	0	0	0	North
150700	Santo Antônio do Tauá	PA	31038	2	0	0.921	0	0	0	0	0	North
150710	São Caetano de Odivelas	PA	17970	26	0	20.669	0	0	0	0	0	North
150715	São Domingos do Araguaia	PA	25358	440	0	247.879	0	2	0	1.127	0	North
150720	São Domingos do Capim	PA	31837	13	0	5.833	0	0	0	0	0	North
150730	São Félix do Xingu	PA	124763	21	0	2.405	0	10	0	1.145	0	North
150740	São Francisco do Pará	PA	15833	7	0	6.316	0	1	0	0.902	0	North
150745	São Geraldo do Araguaia	PA	24991	118	0	67.453	0	0	0	0	0	North
150746	São João da Ponta	PA	6059	0	0	0	0	1	0	2.358	0	North
150747	São João de Pirabas	PA	22842	60	0	37.525	0	0	0	0	0	North
150750	São João do Araguaia	PA	13940	9	0	9.223	0	0	0	0	0	North
150760	São Miguel do Guamá	PA	58328	6	0	1.47	0	0	0	0	0	North
150770	São Sebastião da Boa Vista	PA	26301	5	0	2.716	0	0	0	0	0	North
150775	Sapucaia	PA	5849	2	0	4.885	0	0	0	0	0	North
150780	Senador José Porfírio	PA	11839	2	0	2.413	0	0	0	0	0	North
150790	Soure	PA	25181	158	0	89.637	0	0	0	0	0	North
150795	Tailândia	PA	103664	191	0	26.321	0	43	0	5.926	0	North
150796	Terra Alta	PA	11591	1	0	1.232	0	0	0	0	0	North
150797	Terra Santa	PA	18619	0	0	0	0	0	0	0	0	North
150800	Tomé-Açu	PA	62854	48	0	10.91	0	16	1	3.637	2.273	North
150803	Tracuateua	PA	30656	13	0	6.058	0	0	0	0	0	North
150805	Trairão	PA	18807	0	0	0	0	0	0	0	0	North
150808	Tucumã	PA	39059	1	0	0.366	0	1	0	0.366	0	North
150810	Tucuruí	PA	112148	90	0	11.464	0	10	0	1.274	0	North
150812	Ulianópolis	PA	57632	67	0	16.608	0	1	0	0.248	0	North
150815	Uruará	PA	45517	1	0	0.314	0	1	0	0.314	0	North
150820	Vigia	PA	53191	41	0	11.012	0	17	0	4.566	0	North
150830	Viseu	PA	61049	4	0	0.936	0	0	0	0	0	North
150835	Vitória do Xingu	PA	14987	1	0	0.953	0	0	0	0	0	North
150840	Xinguara	PA	44410	1515	5	487.342	16.084	77	0	24.769	0	North
160005	Serra do Navio	AP	5306	71	0	191.158	0	0	0	0	0	North
160010	Amapá	AP	9029	1	0	1.582	0	0	0	0	0	North
160015	Pedra Branca do Amapari	AP	15931	25	0	22.418	0	2	0	1.793	0	North
160020	Calçoene	AP	10926	1	0	1.307	0	0	0	0	0	North
160021	Cutias	AP	5864	0	0	0	0	0	0	0	0	North
160023	Ferreira Gomes	AP	7591	9	0	16.937	0	1	0	1.882	0	North
160025	Itaubal	AP	5387	0	0	0	0	0	0	0	0	North
160027	Laranjal do Jari	AP	49446	64	0	18.491	0	0	0	0	0	North
160030	Macapá	AP	493634	428	1	12.386	0.289	412	0	11.923	0	North
160040	Mazagão	AP	21206	27	0	18.189	0	11	0	7.41	0	North
160050	Oiapoque	AP	26627	930	0	498.956	0	32	0	17.168	0	North
160053	Porto Grande	AP	21484	47	0	31.252	0	4	0	2.66	0	North
160055	Pracuúba	AP	4993	0	0	0	0	0	0	0	0	North
160060	Santana	AP	119610	77	0	9.197	0	12	0	1.433	0	North
160070	Tartarugalzinho	AP	16855	1	0	0.848	0	0	0	0	0	North
160080	Vitória do Jari	AP	15605	2	0	1.831	0	0	0	0	0	North
170025	Abreulândia	TO	2564	0	0	0	0	1	0	5.572	0	North
170030	Aguiarnópolis	TO	6572	50	0	108.686	0	9	0	19.564	0	North
170035	Aliança do Tocantins	TO	5434	1	1	2.629	26.289	0	0	0	0	North
170040	Almas	TO	7131	0	0	0	0	1	0	2.003	0	North
170070	Alvorada	TO	8427	0	0	0	0	1	0	1.695	0	North
170100	Ananás	TO	9607	101	0	150.188	0	1	0	1.487	0	North
170105	Angico	TO	3412	5	0	20.935	0	0	0	0	0	North
170110	Aparecida do Rio Negro	TO	4741	9	0	27.119	0	1	0	3.013	0	North
170130	Aragominas	TO	5786	27	0	66.663	0	3	0	7.407	0	North
170190	Araguacema	TO	7016	0	0	0	0	1	0	2.036	0	North
170200	Araguaçu	TO	8567	1	0	1.668	0	0	0	0	0	North
170210	Araguaína	TO	177517	621	0	49.975	0	495	1	39.835	0.805	North
170215	Araguanã	TO	5663	10	1	25.226	25.226	6	0	15.136	0	North
170220	Araguatins	TO	35346	182	0	73.559	0	81	0	32.738	0	North
170230	Arapoema	TO	6670	1	0	2.142	0	0	0	0	0	North
170240	Arraias	TO	10601	2	0	2.695	0	0	0	0	0	North
170255	Augustinópolis	TO	18178	7	0	5.501	0	3	0	2.358	0	North
170270	Aurora do Tocantins	TO	3731	1	0	3.829	0	0	0	0	0	North
170290	Axixá do Tocantins	TO	9725	0	0	0	0	0	0	0	0	North
170300	Babaçulândia	TO	10662	9	0	12.059	0	2	0	2.68	0	North
170305	Bandeirantes do Tocantins	TO	3512	6	0	24.406	0	0	0	0	0	North
170307	Barra do Ouro	TO	4549	0	0	0	0	0	0	0	0	North
170310	Barrolândia	TO	5614	0	0	0	0	0	0	0	0	North
170320	Bernardo Sayão	TO	4469	1	0	3.197	0	2	0	6.393	0	North
170330	Bom Jesus do Tocantins	TO	4779	0	0	0	0	10	0	29.893	0	North
170360	Brasilândia do Tocantins	TO	2191	0	0	0	0	0	0	0	0	North
170370	Brejinho de Nazaré	TO	5475	0	0	0	0	1	0	2.609	0	North
170380	Buriti do Tocantins	TO	11197	21	0	26.793	0	1	0	1.276	0	North
170382	Cachoeirinha	TO	2266	0	0	0	0	0	0	0	0	North
170384	Campos Lindos	TO	9917	2	0	2.881	0	2	0	2.881	0	North
170386	Cariri do Tocantins	TO	4321	1	0	3.306	0	0	0	0	0	North
170388	Carmolândia	TO	2556	1	0	5.589	0	0	0	0	0	North
170389	Carrasco Bonito	TO	4059	17	1	59.832	35.195	1	0	3.52	0	North
170390	Caseara	TO	5295	0	0	0	0	0	0	0	0	North
170410	Centenário	TO	2874	0	0	0	0	0	0	0	0	North
170460	Chapada de Areia	TO	1401	0	0	0	0	0	0	0	0	North
170510	Chapada da Natividade	TO	3334	0	0	0	0	0	0	0	0	North
170550	Colinas do Tocantins	TO	34990	141	0	57.567	0	17	0	6.941	0	North
170555	Combinado	TO	4843	8	0	23.598	0	0	0	0	0	North
170560	Conceição do Tocantins	TO	4124	0	0	0	0	1	0	3.464	0	North
170600	Couto Magalhães	TO	5536	2	0	5.161	0	1	0	2.581	0	North
170610	Cristalândia	TO	7300	0	0	0	0	0	0	0	0	North
170625	Crixás do Tocantins	TO	1708	0	0	0	0	0	0	0	0	North
170650	Darcinópolis	TO	6018	54	0	128.187	0	3	0	7.121	0	North
170700	Dianópolis	TO	21850	4	0	2.615	0	2	0	1.308	0	North
170710	Divinópolis do Tocantins	TO	6856	2	0	4.167	0	3	0	6.251	0	North
170720	Dois Irmãos do Tocantins	TO	7211	1	0	1.981	0	0	0	0	0	North
170730	Dueré	TO	4687	0	0	0	0	0	0	0	0	North
170740	Esperantina	TO	10851	23	0	30.28	0	1	0	1.317	0	North
170755	Fátima	TO	3841	0	0	0	0	0	0	0	0	North
170765	Figueirópolis	TO	5284	3	0	8.111	0	0	0	0	0	North
170770	Filadélfia	TO	8837	1	0	1.617	0	0	0	0	0	North
170820	Formoso do Araguaia	TO	18482	2	0	1.546	0	5	0	3.865	0	North
170825	Tabocão	TO	2576	1	0	5.546	0	5	0	27.728	0	North
170830	GoiaNorth	TO	5116	0	0	0	0	0	0	0	0	North
170900	Goiatins	TO	12942	1	0	1.104	0	0	0	0	0	North
170930	Guaraí	TO	25677	128	0	71.214	0	84	0	46.734	0	North
170950	Gurupi	TO	85737	26	0	4.332	0	69	0	11.497	0	North
170980	Ipueiras	TO	1977	0	0	0	0	0	0	0	0	North
171050	Itacajá	TO	7414	0	0	0	0	1	0	1.927	0	North
171070	Itaguatins	TO	5896	3	0	7.269	0	0	0	0	0	North
171090	Itapiratins	TO	3758	1	0	3.801	0	0	0	0	0	North
171110	Itaporã do Tocantins	TO	2435	10	0	58.668	0	18	0	105.603	0	North
171150	Jaú do Tocantins	TO	3819	0	0	0	0	0	0	0	0	North
171180	Juarina	TO	2202	1	0	6.488	0	0	0	0	0	North
171190	Lagoa da Confusão	TO	13034	1	0	1.096	0	3	0	3.288	0	North
171195	Lagoa do Tocantins	TO	4237	0	0	0	0	0	0	0	0	North
171200	Lajeado	TO	3101	0	0	0	0	0	0	0	0	North
171215	Lavandeira	TO	1892	2	0	15.101	0	1	0	7.551	0	North
171240	Lizarda	TO	3748	0	0	0	0	0	0	0	0	North
171245	Luzinópolis	TO	3060	0	0	0	0	0	0	0	0	North
171250	Marianópolis do Tocantins	TO	5094	0	0	0	0	0	0	0	0	North
171270	Mateiros	TO	2638	0	0	0	0	0	0	0	0	North
171280	Maurilândia do Tocantins	TO	3403	3	0	12.594	0	3	0	12.594	0	North
171320	Miracema do Tocantins	TO	18566	7	0	5.386	0	2	0	1.539	0	North
171330	MiraNorth	TO	13375	11	0	11.749	0	8	0	8.545	0	North
171360	Monte do Carmo	TO	7827	2	0	3.65	0	3	0	5.476	0	North
171370	Monte Santo do Tocantins	TO	2263	0	0	0	0	1	0	6.313	0	North
171380	Palmeiras do Tocantins	TO	6570	0	0	0	0	0	0	0	0	North
171395	Muricilândia	TO	3514	0	0	0	0	1	0	4.065	0	North
171420	Natividade	TO	9239	3	0	4.639	0	0	0	0	0	North
171430	Nazaré	TO	3963	1	0	3.605	0	1	0	3.605	0	North
171488	Nova Olinda	TO	11719	51	0	62.17	0	2	0	2.438	0	North
171500	Nova Rosalândia	TO	4215	0	0	0	0	15	0	50.839	0	North
171510	Novo Acordo	TO	4287	0	0	0	0	0	0	0	0	North
171515	Novo Alegre	TO	2332	10	0	61.259	0	23	0	140.897	0	North
171525	Novo Jardim	TO	2698	0	0	0	0	0	0	0	0	North
171550	Oliveira de Fátima	TO	1106	0	0	0	0	0	0	0	0	North
171570	Palmeirante	TO	5919	0	0	0	0	1	0	2.414	0	North
171575	Palmeirópolis	TO	7641	1	0	1.87	0	7	0	13.087	0	North
171610	Paraíso do Tocantins	TO	50602	82	1	23.15	2.823	24	0	6.776	0	North
171620	Paranã	TO	10461	0	0	0	0	0	0	0	0	North
171630	Pau D'Arco	TO	4831	0	0	0	0	0	0	0	0	North
171650	Pedro Afonso	TO	13380	13	0	13.88	0	5	0	5.338	0	North
171660	Peixe	TO	11623	4	0	4.916	0	1	0	1.229	0	North
171665	Pequizeiro	TO	5443	23	0	60.366	0	6	0	15.748	0	North
171670	Colméia	TO	8270	11	0	19.002	0	1	0	1.727	0	North
171700	Pindorama do Tocantins	TO	4464	0	0	0	0	0	0	0	0	North
171720	Piraquê	TO	3023	0	0	0	0	1	0	4.726	0	North
171750	Pium	TO	7564	2	0	3.777	0	0	0	0	0	North
171780	Ponte Alta do Bom Jesus	TO	4601	0	0	0	0	1	0	3.105	0	North
171790	Ponte Alta do Tocantins	TO	7961	0	0	0	0	0	0	0	0	North
171800	Porto Alegre do Tocantins	TO	3108	0	0	0	0	2	0	9.193	0	North
171820	Porto Nacional	TO	52700	11	0	2.982	0	171	0	46.354	0	North
171830	Praia North	TO	8365	80	0	136.624	0	2	0	3.416	0	North
171840	Presidente Kennedy	TO	3692	47	0	181.86	0	0	0	0	0	North
171845	Pugmil	TO	2659	0	0	0	0	5	0	26.863	0	North
171850	Recursolândia	TO	4244	0	0	0	0	0	0	0	0	North
171855	Riachinho	TO	4604	8	0	24.823	0	1	0	3.103	0	North
171865	Rio da Conceição	TO	2088	1	0	6.842	0	0	0	0	0	North
171870	Rio dos Bois	TO	2811	0	0	0	0	0	0	0	0	North
171875	Rio Sono	TO	6468	1	0	2.209	0	2	0	4.417	0	North
171880	Sampaio	TO	4627	37	0	114.236	0	0	0	0	0	North
171884	Sandolândia	TO	3378	1	0	4.229	0	0	0	0	0	North
171886	Santa Fé do Araguaia	TO	7426	4	0	7.695	0	1	0	1.924	0	North
171888	Santa Maria do Tocantins	TO	3381	0	0	0	0	0	0	0	0	North
171889	Santa Rita do Tocantins	TO	2344	0	0	0	0	0	0	0	0	North
171890	Santa Rosa do Tocantins	TO	4811	0	0	0	0	2	0	5.939	0	North
171900	Santa Tereza do Tocantins	TO	2834	17	0	85.694	0	18	0	90.735	0	North
172000	Santa Terezinha do Tocantins	TO	2529	0	0	0	0	0	0	0	0	North
172010	São Bento do Tocantins	TO	5256	0	0	0	0	0	0	0	0	North
172015	São Félix do Tocantins	TO	1572	0	0	0	0	0	0	0	0	North
172020	São Miguel do Tocantins	TO	11983	19	0	22.651	0	1	0	1.192	0	North
172025	São Salvador do Tocantins	TO	3070	0	0	0	0	0	0	0	0	North
172030	São Sebastião do Tocantins	TO	4757	4	0	12.012	0	0	0	0	0	North
172049	São Valério	TO	4017	6	0	21.338	0	2	0	7.113	0	North
172065	Silvanópolis	TO	5378	0	0	0	0	0	0	0	0	North
172080	Sítio Novo do Tocantins	TO	9062	0	0	0	0	8	0	12.612	0	North
172085	Sucupira	TO	1946	1	0	7.341	0	0	0	0	0	North
172090	Taguatinga	TO	16538	56	0	48.373	0	18	0	15.549	0	North
172093	Taipas do Tocantins	TO	2131	3	0	20.111	0	0	0	0	0	North
172097	Talismã	TO	2773	0	0	0	0	0	0	0	0	North
172100	Palmas	TO	291855	744	0	36.417	0	1110	0	54.332	0	North
172110	Tocantínia	TO	7471	6	0	11.473	0	73	0	139.587	0	North
172120	Tocantinópolis	TO	22896	326	1	203.404	6.239	164	0	102.326	0	North
172125	Tupirama	TO	1860	0	0	0	0	0	0	0	0	North
172130	Tupiratins	TO	2613	0	0	0	0	0	0	0	0	North
172208	Wanderlândia	TO	11631	100	0	122.824	0	0	0	0	0	North
172210	Xambioá	TO	11561	1	0	1.236	0	3	0	3.707	0	North
210005	Açailândia	MA	111757	33	0	4.218	0	0	0	0	0	Northeast
210010	Afonso Cunha	MA	6469	1	0	2.208	0	0	0	0	0	Northeast
210015	Água Doce do Maranhão	MA	12488	1	0	1.144	0	4	0	4.576	0	Northeast
210020	Alcântara	MA	22083	26	0	16.82	0	8	0	5.175	0	Northeast
210030	Aldeias Altas	MA	26302	5	0	2.716	0	0	0	0	0	Northeast
210040	Altamira do Maranhão	MA	8066	0	0	0	0	0	0	0	0	Northeast
210043	Alto Alegre do Maranhão	MA	27430	148	0	77.079	0	1	0	0.521	0	Northeast
210047	Alto Alegre do Pindaré	MA	31894	18	0	8.062	0	0	0	0	0	Northeast
210050	Alto Parnaíba	MA	11168	6	0	7.675	0	1	0	1.279	0	Northeast
210055	Amapá do Maranhão	MA	6918	0	0	0	0	0	0	0	0	Northeast
210060	Amarante do Maranhão	MA	41136	305	0	105.92	0	113	0	39.243	0	Northeast
210070	Anajatuba	MA	26614	5	0	2.684	0	0	0	0	0	Northeast
210080	Anapurus	MA	15566	7	0	6.424	0	1	0	0.918	0	Northeast
210083	Apicum-Açu	MA	17063	3	0	2.512	0	0	0	0	0	Northeast
210087	Araguanã	MA	15297	0	0	0	0	0	0	0	0	Northeast
210090	Araioses	MA	46103	1	0	0.31	0	0	0	0	0	Northeast
210095	Arame	MA	32637	2	0	0.875	0	0	0	0	0	Northeast
210100	Arari	MA	29764	4	0	1.92	0	0	0	0	0	Northeast
210110	Axixá	MA	12076	2	0	2.366	0	0	0	0	0	Northeast
210120	Bacabal	MA	104165	152	0	20.846	0	14	0	1.92	0	Northeast
210125	Bacabeira	MA	16855	15	0	12.713	0	5	0	4.238	0	Northeast
210130	Bacuri	MA	18508	1	0	0.772	0	1	0	0.772	0	Northeast
210135	Bacurituba	MA	5617	1	0	2.543	0	0	0	0	0	Northeast
210140	Balsas	MA	93826	2083	0	317.152	0	17	0	2.588	0	Northeast
210150	Barão de Grajaú	MA	18714	1	0	0.763	0	0	0	0	0	Northeast
210160	Barra do Corda	MA	87664	573	4	93.376	6.518	198	0	32.266	0	Northeast
210170	Barreirinhas	MA	61828	4	0	0.924	0	1	0	0.231	0	Northeast
210173	Belágua	MA	7409	1	0	1.928	0	0	0	0	0	Northeast
210177	Bela Vista do Maranhão	MA	11138	2	0	2.565	0	0	0	0	0	Northeast
210180	Benedito Leite	MA	5627	4	0	10.155	0	0	0	0	0	Northeast
210190	Bequimão	MA	21260	2	0	1.344	0	1	0	0.672	0	Northeast
210193	Bernardo do Mearim	MA	6011	2	0	4.753	0	0	0	0	0	Northeast
210197	Boa Vista do Gurupi	MA	8155	1	0	1.752	0	0	0	0	0	Northeast
210200	Bom Jardim	MA	41435	6	0	2.069	0	0	0	0	0	Northeast
210203	Bom Jesus das Selvas	MA	33479	215	0	91.742	0	0	0	0	0	Northeast
210207	Bom Lugar	MA	16148	1	0	0.885	0	0	0	0	0	Northeast
210210	Brejo	MA	36139	2	0	0.791	0	0	0	0	0	Northeast
210215	Brejo de Areia	MA	9367	0	0	0	0	0	0	0	0	Northeast
210220	Buriti	MA	28557	0	0	0	0	0	0	0	0	Northeast
210230	Buriti Bravo	MA	23827	1	0	0.6	0	0	0	0	0	Northeast
210232	Buriticupu	MA	71723	0	0	0	0	0	0	0	0	Northeast
210235	Buritirana	MA	15393	1	0	0.928	0	0	0	0	0	Northeast
210237	Cachoeira Grande	MA	9382	0	0	0	0	0	0	0	0	Northeast
210240	Cajapió	MA	11136	0	0	0	0	0	0	0	0	Northeast
210250	Cajari	MA	19307	1	0	0.74	0	0	0	0	0	Northeast
210255	Campestre do Maranhão	MA	14294	208	0	207.879	0	0	0	0	0	Northeast
210260	Cândido Mendes	MA	20076	1	0	0.712	0	0	0	0	0	Northeast
210270	Cantanhede	MA	21872	5	1	3.266	6.532	3	0	1.959	0	Northeast
210275	Capinzal do North	MA	10932	0	0	0	0	1	0	1.307	0	Northeast
210280	Carolina	MA	24194	25	0	14.762	0	0	0	0	0	Northeast
210290	Carutapera	MA	23658	2	0	1.208	0	0	0	0	0	Northeast
210300	Caxias	MA	164224	1443	6	125.525	5.219	7	1	0.609	0.87	Northeast
210310	Cedral	MA	10657	0	0	0	0	0	0	0	0	Northeast
210312	Central do Maranhão	MA	8604	1	0	1.66	0	0	0	0	0	Northeast
210315	Centro do Guilherme	MA	13243	1	0	1.079	0	1	0	1.079	0	Northeast
210317	Centro Novo do Maranhão	MA	21399	0	0	0	0	0	0	0	0	Northeast
210320	Chapadinha	MA	79145	15	1	2.708	1.805	3	1	0.542	1.805	Northeast
210325	Cidelândia	MA	14617	114	0	111.416	0	0	0	0	0	Northeast
210330	Codó	MA	122597	36	0	4.195	0	4	0	0.466	0	Northeast
210340	Coelho Neto	MA	49246	195	0	56.567	0	3	0	0.87	0	Northeast
210350	Colinas	MA	41042	2	0	0.696	0	1	0	0.348	0	Northeast
210355	Conceição do Lago-Açu	MA	16072	1	0	0.889	0	0	0	0	0	Northeast
210360	Coroatá	MA	65044	15	0	3.294	0	1	0	0.22	0	Northeast
210370	Cururupu	MA	32765	77	0	33.572	0	2	0	0.872	0	Northeast
210375	Davinópolis	MA	12901	42	0	46.508	0	3	0	3.322	0	Northeast
210380	Dom Pedro	MA	23328	3	0	1.837	0	0	0	0	0	Northeast
210390	Duque Bacelar	MA	11296	0	0	0	0	0	0	0	0	Northeast
210400	Esperantinópolis	MA	17379	6	0	4.932	0	1	0	0.822	0	Northeast
210405	Estreito	MA	41355	31	0	10.709	0	28	0	9.672	0	Northeast
210407	Feira Nova do Maranhão	MA	8439	7	0	11.85	0	0	0	0	0	Northeast
210408	Fernando Falcão	MA	10258	1	0	1.393	0	0	0	0	0	Northeast
210409	Formosa da Serra Negra	MA	18917	22	0	16.614	0	0	0	0	0	Northeast
210410	Fortaleza dos Nogueiras	MA	12615	30	0	33.973	0	0	0	0	0	Northeast
210420	Fortuna	MA	17745	69	0	55.549	0	3	0	2.415	0	Northeast
210430	Godofredo Viana	MA	11672	1	0	1.224	0	1	0	1.224	0	Northeast
210440	Gonçalves Dias	MA	17924	0	0	0	0	0	0	0	0	Northeast
210450	Governador Archer	MA	10793	1	0	1.324	0	0	0	0	0	Northeast
210455	Governador Edison Lobão	MA	18068	198	0	156.551	0	9	0	7.116	0	Northeast
210460	Governador Eugênio Barros	MA	14561	0	0	0	0	0	0	0	0	Northeast
210462	Governador Luiz Rocha	MA	7774	13	0	23.889	0	0	0	0	0	Northeast
210465	Governador Newton Bello	MA	10211	0	0	0	0	0	0	0	0	Northeast
210467	Governador Nunes Freire	MA	25616	2	0	1.115	0	1	0	0.558	0	Northeast
210470	Graça Aranha	MA	6263	0	0	0	0	0	0	0	0	Northeast
210480	Grajaú	MA	68777	15	0	3.116	0	1	0	0.208	0	Northeast
210490	Guimarães	MA	12063	1	0	1.184	0	0	0	0	0	Northeast
210500	Humberto de Campos	MA	28498	1	0	0.501	0	0	0	0	0	Northeast
210510	Icatu	MA	26953	2	0	1.06	0	1	0	0.53	0	Northeast
210515	Igarapé do Meio	MA	14026	1	0	1.019	0	0	0	0	0	Northeast
210520	Igarapé Grande	MA	11252	1	0	1.27	0	0	0	0	0	Northeast
210530	Imperatriz	MA	258016	1153	0	63.839	0	79	0	4.374	0	Northeast
210535	Itaipava do Grajaú	MA	15689	7	0	6.374	0	0	0	0	0	Northeast
210540	Itapecuru Mirim	MA	67673	39	0	8.233	0	2	0	0.422	0	Northeast
210542	Itinga do Maranhão	MA	25932	6	0	3.305	0	1	0	0.551	0	Northeast
210545	Jatobá	MA	9993	0	0	0	0	0	0	0	0	Northeast
210547	Jenipapo dos Vieiras	MA	16869	20	0	16.937	0	0	0	0	0	Northeast
210550	João Lisboa	MA	23869	1	0	0.599	0	0	0	0	0	Northeast
210560	Joselândia	MA	16136	3	0	2.656	0	0	0	0	0	Northeast
210565	Junco do Maranhão	MA	4509	0	0	0	0	0	0	0	0	Northeast
210570	Lago da Pedra	MA	49911	53	1	15.17	2.862	1	0	0.286	0	Northeast
210580	Lago do Junco	MA	10808	0	0	0	0	0	0	0	0	Northeast
210590	Lago Verde	MA	16199	3	0	2.646	0	0	0	0	0	Northeast
210592	Lagoa do Mato	MA	11235	2	0	2.543	0	0	0	0	0	Northeast
210594	Lago dos Rodrigues	MA	8889	52	0	83.57	0	0	0	0	0	Northeast
210596	Lagoa Grande do Maranhão	MA	11320	15	0	18.93	0	0	0	0	0	Northeast
210598	Lajeado Novo	MA	7496	23	0	43.833	0	0	0	0	0	Northeast
210600	Lima Campos	MA	11867	1	0	1.204	0	0	0	0	0	Northeast
210610	Loreto	MA	12098	123	0	145.242	0	0	0	0	0	Northeast
210620	Luís Domingues	MA	6917	0	0	0	0	0	0	0	0	Northeast
210630	Magalhães de Almeida	MA	19620	0	0	0	0	0	0	0	0	Northeast
210632	Maracaçumé	MA	21201	35	0	23.584	0	2	0	1.348	0	Northeast
210635	Marajá do Sena	MA	7810	0	0	0	0	0	0	0	0	Northeast
210637	Maranhãozinho	MA	16013	0	0	0	0	0	0	0	0	Northeast
210640	Mata Roma	MA	16679	4	0	3.426	0	0	0	0	0	Northeast
210650	Matinha	MA	23256	0	0	0	0	0	0	0	0	Northeast
210660	Matões	MA	33615	15	0	6.375	0	0	0	0	0	Northeast
210663	Matões do North	MA	16451	1	0	0.868	0	1	0	0.868	0	Northeast
210667	Milagres do Maranhão	MA	8445	0	0	0	0	0	0	0	0	Northeast
210670	Mirador	MA	21000	1	0	0.68	0	1	0	0.68	0	Northeast
210675	Miranda do North	MA	28001	4	0	2.041	0	1	0	0.51	0	Northeast
210680	Mirinzal	MA	14913	23	0	22.033	0	3	0	2.874	0	Northeast
210690	Monção	MA	33201	1	0	0.43	0	1	0	0.43	0	Northeast
210700	Montes Altos	MA	9209	66	0	102.384	0	5	0	7.756	0	Northeast
210710	Morros	MA	19292	2	0	1.481	0	0	0	0	0	Northeast
210720	Nina Rodrigues	MA	14264	1	0	1.002	0	1	0	1.002	0	Northeast
210725	Nova Colinas	MA	5340	2	0	5.35	0	0	0	0	0	Northeast
210730	Nova Iorque	MA	4683	43	0	131.174	0	0	0	0	0	Northeast
210735	Nova Olinda do Maranhão	MA	20774	1	0	0.688	0	1	0	0.688	0	Northeast
210740	Olho d'Água das Cunhãs	MA	19448	0	0	0	0	0	0	0	0	Northeast
210745	Olinda Nova do Maranhão	MA	14563	2	0	1.962	0	0	0	0	0	Northeast
210750	Paço do Lumiar	MA	120621	819	0	96.998	0	92	0	10.896	0	Northeast
210760	Palmeirândia	MA	19661	0	0	0	0	0	0	0	0	Northeast
210770	Paraibano	MA	21290	14	0	9.394	0	0	0	0	0	Northeast
210780	Parnarama	MA	34805	0	0	0	0	0	0	0	0	Northeast
210790	Passagem Franca	MA	18898	0	0	0	0	0	0	0	0	Northeast
210800	Pastos Bons	MA	19358	20	0	14.759	0	0	0	0	0	Northeast
210805	Paulino Neves	MA	15901	1	0	0.898	0	1	0	0.898	0	Northeast
210810	Paulo Ramos	MA	21015	0	0	0	0	0	0	0	0	Northeast
210820	Pedreiras	MA	39267	7	0	2.547	0	11	0	4.002	0	Northeast
210825	Pedro do Rosário	MA	24930	0	0	0	0	0	0	0	0	Northeast
210830	Penalva	MA	38203	2	0	0.748	0	1	0	0.374	0	Northeast
210840	Peri Mirim	MA	14291	0	0	0	0	0	0	0	0	Northeast
210845	Peritoró	MA	23025	6	0	3.723	0	1	0	0.62	0	Northeast
210850	Pindaré-Mirim	MA	32815	5	0	2.177	0	12	0	5.224	0	Northeast
210860	Pinheiro	MA	82990	2	0	0.344	0	2	0	0.344	0	Northeast
210870	Pio XII	MA	21594	2	0	1.323	0	2	0	1.323	0	Northeast
210880	Pirapemas	MA	18527	0	0	0	0	0	0	0	0	Northeast
210890	Poção de Pedras	MA	18157	19	0	14.949	0	0	0	0	0	Northeast
210900	Porto Franco	MA	23675	54	0	32.584	0	0	0	0	0	Northeast
210905	Porto Rico do Maranhão	MA	5995	1	0	2.383	0	0	0	0	0	Northeast
210910	Presidente Dutra	MA	47567	91	0	27.33	0	30	0	9.01	0	Northeast
210920	Presidente Juscelino	MA	12629	2	0	2.262	0	1	0	1.131	0	Northeast
210923	Presidente Médici	MA	6959	0	0	0	0	0	0	0	0	Northeast
210927	Presidente Sarney	MA	18764	43	0	32.737	0	1	0	0.761	0	Northeast
210930	Presidente Vargas	MA	11124	1	0	1.284	0	1	0	1.284	0	Northeast
210940	Primeira Cruz	MA	15197	28	0	26.321	0	1	0	0.94	0	Northeast
210945	Raposa	MA	30337	10	0	4.709	0	18	0	8.476	0	Northeast
210950	Riachão	MA	20428	88	0	61.54	0	0	0	0	0	Northeast
210955	Ribamar Fiquene	MA	7755	2	0	3.684	0	0	0	0	0	Northeast
210960	Rosário	MA	42482	124	0	41.698	0	8	0	2.69	0	Northeast
210970	Sambaíba	MA	5663	3	0	7.568	0	1	0	2.523	0	Northeast
210975	Santa Filomena do Maranhão	MA	7719	1	0	1.851	0	1	0	1.851	0	Northeast
210980	Santa Helena	MA	41770	7	0	2.394	0	0	0	0	0	Northeast
210990	Santa Inês	MA	88590	147	0	23.705	0	6	0	0.968	0	Northeast
211000	Santa Luzia	MA	72440	4	0	0.789	0	2	0	0.394	0	Northeast
211003	Santa Luzia do Paruá	MA	25134	3	0	1.705	0	0	0	0	0	Northeast
211010	Santa Quitéria do Maranhão	MA	25519	2	0	1.12	0	22	0	12.316	0	Northeast
211020	Santa Rita	MA	37404	8	0	3.055	0	4	0	1.528	0	Northeast
211023	Santana do Maranhão	MA	13223	0	0	0	0	1	0	1.08	0	Northeast
211027	Santo Amaro do Maranhão	MA	15654	1	0	0.913	0	1	0	0.913	0	Northeast
211030	Santo Antônio dos Lopes	MA	14534	0	0	0	0	0	0	0	0	Northeast
211040	São Benedito do Rio Preto	MA	18608	2	0	1.535	0	0	0	0	0	Northeast
211050	São Bento	MA	44811	2	0	0.638	0	0	0	0	0	Northeast
211060	São Bernardo	MA	28343	1	0	0.504	0	0	0	0	0	Northeast
211065	São Domingos do Azeitão	MA	7363	68	0	131.934	0	0	0	0	0	Northeast
211070	São Domingos do Maranhão	MA	34368	8	0	3.325	0	4	0	1.663	0	Northeast
211080	São Félix de Balsas	MA	4609	1	0	3.1	0	0	0	0	0	Northeast
211085	São Francisco do Brejão	MA	11652	54	0	66.206	0	3	0	3.678	0	Northeast
211090	São Francisco do Maranhão	MA	12201	0	0	0	0	1	0	1.171	0	Northeast
211100	São João Batista	MA	20629	1	0	0.693	0	1	0	0.693	0	Northeast
211102	São João do Carú	MA	15828	0	0	0	0	0	0	0	0	Northeast
211105	São João do Paraíso	MA	11162	53	0	67.832	0	23	0	29.437	0	Northeast
211107	São João do Soter	MA	18438	2	0	1.55	0	0	0	0	0	Northeast
211110	São João dos Patos	MA	25860	11	0	6.077	0	0	0	0	0	Northeast
211120	São José de Ribamar	MA	176321	551	2	44.643	1.62	456	0	36.946	0	Northeast
211125	São José dos Basílios	MA	7642	0	0	0	0	0	0	0	0	Northeast
211130	São Luís	MA	1094667	4169	16	54.407	2.088	2935	4	38.303	0.522	Northeast
211140	São Luís Gonzaga do Maranhão	MA	18988	4	0	3.009	0	1	0	0.752	0	Northeast
211150	São Mateus do Maranhão	MA	41227	22	0	7.623	0	1	0	0.347	0	Northeast
211153	São Pedro da Água Branca	MA	12645	307	0	346.834	0	0	0	0	0	Northeast
211157	São Pedro dos Crentes	MA	4651	1	0	3.072	0	0	0	0	0	Northeast
211160	São Raimundo das Mangabeiras	MA	18755	815	0	620.787	0	2	0	1.523	0	Northeast
211163	São Raimundo do Doca Bezerra	MA	5345	1	0	2.673	0	0	0	0	0	Northeast
211167	São Roberto	MA	6649	2	0	4.297	0	0	0	0	0	Northeast
211170	São Vicente Ferrer	MA	22142	0	0	0	0	0	0	0	0	Northeast
211172	Satubinha	MA	13730	0	0	0	0	0	0	0	0	Northeast
211174	Senador Alexandre Costa	MA	11067	8	0	10.327	0	0	0	0	0	Northeast
211176	Senador La Rocque	MA	14194	225	0	226.454	0	94	0	94.607	0	Northeast
211178	Serrano do Maranhão	MA	10206	2	0	2.799	0	0	0	0	0	Northeast
211180	Sítio Novo	MA	18001	5	0	3.968	0	0	0	0	0	Northeast
211190	Sucupira do North	MA	10639	1	0	1.343	0	1	0	1.343	0	Northeast
211195	Sucupira do Riachão	MA	5645	0	0	0	0	0	0	0	0	Northeast
211200	Tasso Fragoso	MA	8459	7	0	11.822	0	4	0	6.755	0	Northeast
211210	Timbiras	MA	29064	1	0	0.492	0	1	0	0.492	0	Northeast
211220	Timon	MA	167973	21	1	1.786	0.85	5	0	0.425	0	Northeast
211223	Trizidela do Vale	MA	21885	1	0	0.653	0	0	0	0	0	Northeast
211227	Tufilândia	MA	5826	1	0	2.452	0	0	0	0	0	Northeast
211230	Tuntum	MA	41621	183	0	62.812	0	2	0	0.686	0	Northeast
211240	Turiaçu	MA	35497	4	0	1.61	0	1	0	0.402	0	Northeast
211245	Turilândia	MA	25365	1	0	0.563	0	0	0	0	0	Northeast
211250	Tutóia	MA	58311	121	0	29.644	0	18	0	4.41	0	Northeast
211260	Urbano Santos	MA	32775	7	0	3.051	0	5	0	2.179	0	Northeast
211270	Vargem Grande	MA	55841	3	0	0.767	0	3	0	0.767	0	Northeast
211280	Viana	MA	52229	12	0	3.282	0	1	0	0.274	0	Northeast
211285	Vila Nova dos Martírios	MA	13183	15	0	16.255	0	0	0	0	0	Northeast
211290	Vitória do Mearim	MA	32664	2	0	0.875	0	0	0	0	0	Northeast
211300	Vitorino Freire	MA	31525	2	0	0.906	0	2	0	0.906	0	Northeast
211400	Zé Doca	MA	51471	229	1	63.559	2.775	326	0	90.481	0	Northeast
220005	Acauã	PI	7065	1	0	2.022	0	0	0	0	0	Northeast
220010	Agricolândia	PI	5148	1	0	2.775	0	0	0	0	0	Northeast
220020	Água Branca	PI	17349	14	0	11.528	0	0	0	0	0	Northeast
220025	Alagoinha do Piauí	PI	7636	2	0	3.742	0	0	0	0	0	Northeast
220027	Alegrete do Piauí	PI	4912	1	0	2.908	0	0	0	0	0	Northeast
220030	Alto Longá	PI	14268	0	0	0	0	0	0	0	0	Northeast
220040	Altos	PI	40440	72	0	25.435	0	1	0	0.353	0	Northeast
220045	Alvorada do Gurguéia	PI	5392	1	0	2.649	0	0	0	0	0	Northeast
220050	Amarante	PI	17592	77	0	62.528	0	0	0	0	0	Northeast
220060	Angical do Piauí	PI	6792	14	0	29.446	0	0	0	0	0	Northeast
220070	Anísio de Abreu	PI	9818	0	0	0	0	0	0	0	0	Northeast
220080	Antônio Almeida	PI	3158	1	0	4.524	0	0	0	0	0	Northeast
220090	Aroazes	PI	5844	0	0	0	0	0	0	0	0	Northeast
220095	Aroeiras do Itaim	PI	2551	0	0	0	0	0	0	0	0	Northeast
220100	Arraial	PI	4735	20	0	60.341	0	0	0	0	0	Northeast
220105	Assunção do Piauí	PI	7828	0	0	0	0	0	0	0	0	Northeast
220110	Avelino Lopes	PI	11252	3	0	3.809	0	0	0	0	0	Northeast
220115	Baixa Grande do Ribeiro	PI	11497	7	0	8.698	0	0	0	0	0	Northeast
220117	Barra D'Alcântara	PI	3950	0	0	0	0	0	0	0	0	Northeast
220120	Barras	PI	46941	2	0	0.609	0	0	0	0	0	Northeast
220130	Barreiras do Piauí	PI	3344	0	0	0	0	0	0	0	0	Northeast
220140	Barro Duro	PI	7038	1	0	2.03	0	0	0	0	0	Northeast
220150	Batalha	PI	26806	1	0	0.533	0	0	0	0	0	Northeast
220155	Bela Vista do Piauí	PI	3999	0	0	0	0	0	0	0	0	Northeast
220157	Belém do Piauí	PI	3544	0	0	0	0	3	0	12.093	0	Northeast
220160	Beneditinos	PI	10462	28	0	38.234	0	0	0	0	0	Northeast
220170	Bertolínia	PI	5495	1	0	2.6	0	0	0	0	0	Northeast
220173	Betânia do Piauí	PI	6200	0	0	0	0	0	0	0	0	Northeast
220177	Boa Hora	PI	6744	0	0	0	0	0	0	0	0	Northeast
220180	Bocaina	PI	4496	0	0	0	0	0	0	0	0	Northeast
220190	Bom Jesus	PI	24960	75	0	42.926	0	7	0	4.006	0	Northeast
220191	Bom Princípio do Piauí	PI	5608	1	0	2.547	0	0	0	0	0	Northeast
220192	Bonfim do Piauí	PI	5654	0	0	0	0	0	0	0	0	Northeast
220194	Boqueirão do Piauí	PI	6388	0	0	0	0	0	0	0	0	Northeast
220196	Brasileira	PI	8310	1	0	1.719	0	0	0	0	0	Northeast
220198	Brejo do Piauí	PI	3902	0	0	0	0	0	0	0	0	Northeast
220200	Buriti dos Lopes	PI	19754	4	0	2.893	0	0	0	0	0	Northeast
220202	Buriti dos Montes	PI	8223	15	0	26.059	0	1	0	1.737	0	Northeast
220205	Cabeceiras do Piauí	PI	10540	1	0	1.355	0	0	0	0	0	Northeast
220207	Cajazeiras do Piauí	PI	3544	0	0	0	0	0	0	0	0	Northeast
220208	Cajueiro da Praia	PI	7608	183	0	343.623	0	0	0	0	0	Northeast
220209	Caldeirão Grande do Piauí	PI	5770	8	0	19.807	0	0	0	0	0	Northeast
220210	Campinas do Piauí	PI	5604	7	0	17.844	0	9	0	22.943	0	Northeast
220211	Campo Alegre do Fidalgo	PI	5019	0	0	0	0	0	0	0	0	Northeast
220213	Campo Grande do Piauí	PI	5919	26	0	62.752	0	6	0	14.481	0	Northeast
220217	Campo Largo do Piauí	PI	7245	0	0	0	0	0	0	0	0	Northeast
220220	Campo Maior	PI	46770	3	0	0.916	0	3	0	0.916	0	Northeast
220225	Canavieira	PI	3957	2	0	7.22	0	0	0	0	0	Northeast
220230	Canto do Buriti	PI	21112	4	0	2.707	0	1	0	0.677	0	Northeast
220240	Capitão de Campos	PI	11388	3	0	3.763	0	0	0	0	0	Northeast
220245	Capitão Gervásio Oliveira	PI	4086	0	0	0	0	0	0	0	0	Northeast
220250	Caracol	PI	10866	0	0	0	0	0	0	0	0	Northeast
220253	Caraúbas do Piauí	PI	5845	1	0	2.444	0	5	0	12.22	0	Northeast
220255	Caridade do Piauí	PI	5049	0	0	0	0	2	0	5.659	0	Northeast
220260	Castelo do Piauí	PI	19715	0	0	0	0	2	0	1.449	0	Northeast
220265	Caxingó	PI	5395	0	0	0	0	0	0	0	0	Northeast
220270	Cocal	PI	27725	1	0	0.515	0	0	0	0	0	Northeast
220271	Cocal de Telha	PI	4881	3	0	8.78	0	0	0	0	0	Northeast
220272	Cocal dos Alves	PI	6140	0	0	0	0	0	0	0	0	Northeast
220273	Coivaras	PI	4007	5	0	17.826	0	0	0	0	0	Northeast
220275	Colônia do Gurguéia	PI	6451	0	0	0	0	0	0	0	0	Northeast
220277	Colônia do Piauí	PI	7651	0	0	0	0	0	0	0	0	Northeast
220280	Conceição do Canindé	PI	4798	0	0	0	0	2	0	5.955	0	Northeast
220285	Coronel José Dias	PI	4678	0	0	0	0	0	0	0	0	Northeast
220290	Corrente	PI	26575	32	0	17.202	0	1	0	0.538	0	Northeast
220300	Cristalândia do Piauí	PI	8264	1	0	1.729	0	0	0	0	0	Northeast
220310	Cristino Castro	PI	10401	0	0	0	0	0	0	0	0	Northeast
220320	Curimatá	PI	11348	0	0	0	0	0	0	0	0	Northeast
220323	Currais	PI	4939	0	0	0	0	0	0	0	0	Northeast
220325	Curralinhos	PI	4425	0	0	0	0	0	0	0	0	Northeast
220327	Curral Novo do Piauí	PI	5316	0	0	0	0	0	0	0	0	Northeast
220330	Demerval Lobão	PI	13793	84	0	87.001	0	4	0	4.143	0	Northeast
220335	Dirceu Arcoverde	PI	6992	1	0	2.043	0	0	0	0	0	Northeast
220340	Dom Expedito Lopes	PI	6884	0	0	0	0	0	0	0	0	Northeast
220342	Domingos Mourão	PI	4356	0	0	0	0	0	0	0	0	Northeast
220345	Dom Inocêncio	PI	9546	0	0	0	0	0	0	0	0	Northeast
220350	Elesbão Veloso	PI	14630	0	0	0	0	1	0	0.976	0	Northeast
220360	Eliseu Martins	PI	4900	0	0	0	0	0	0	0	0	Northeast
220370	Esperantina	PI	39621	1	0	0.361	0	3	0	1.082	0	Northeast
220375	Fartura do Piauí	PI	5295	0	0	0	0	0	0	0	0	Northeast
220380	Flores do Piauí	PI	4464	0	0	0	0	0	0	0	0	Northeast
220385	Floresta do Piauí	PI	2556	0	0	0	0	0	0	0	0	Northeast
220390	Floriano	PI	59840	172	0	41.062	0	3	0	0.716	0	Northeast
220400	Francinópolis	PI	5349	2	0	5.341	0	0	0	0	0	Northeast
220410	Francisco Ayres	PI	4373	4	0	13.067	0	0	0	0	0	Northeast
220415	Francisco Macedo	PI	3166	0	0	0	0	0	0	0	0	Northeast
220420	Francisco Santos	PI	9262	0	0	0	0	0	0	0	0	Northeast
220430	Fronteiras	PI	11590	0	0	0	0	0	0	0	0	Northeast
220435	Geminiano	PI	5424	1	0	2.634	0	1	0	2.634	0	Northeast
220440	Gilbués	PI	10686	0	0	0	0	0	0	0	0	Northeast
220450	Guadalupe	PI	10500	1	0	1.361	0	0	0	0	0	Northeast
220455	Guaribas	PI	4556	0	0	0	0	0	0	0	0	Northeast
220460	Hugo Napoleão	PI	3875	1	0	3.687	0	0	0	0	0	Northeast
220465	Ilha Grande	PI	9394	18	0	27.373	0	0	0	0	0	Northeast
220470	Inhuma	PI	15296	1	0	0.934	0	0	0	0	0	Northeast
220480	Ipiranga do Piauí	PI	9782	3	0	4.381	0	0	0	0	0	Northeast
220490	Isaías Coelho	PI	8532	0	0	0	0	0	0	0	0	Northeast
220500	Itainópolis	PI	11507	1	0	1.241	0	0	0	0	0	Northeast
220510	Itaueira	PI	11010	0	0	0	0	0	0	0	0	Northeast
220515	Jacobina do Piauí	PI	5753	0	0	0	0	0	0	0	0	Northeast
220520	Jaicós	PI	19035	14	0	10.507	0	0	0	0	0	Northeast
220525	Jardim do Mulato	PI	4494	1	0	3.179	0	0	0	0	0	Northeast
220527	Jatobá do Piauí	PI	4855	0	0	0	0	0	0	0	0	Northeast
220530	Jerumenha	PI	4457	0	0	0	0	0	0	0	0	Northeast
220535	João Costa	PI	3010	0	0	0	0	0	0	0	0	Northeast
220540	Joaquim Pires	PI	14332	0	0	0	0	0	0	0	0	Northeast
220545	Joca Marques	PI	5419	0	0	0	0	0	0	0	0	Northeast
220550	José de Freitas	PI	39072	1	0	0.366	0	0	0	0	0	Northeast
220551	Juazeiro do Piauí	PI	5472	0	0	0	0	0	0	0	0	Northeast
220552	Júlio Borges	PI	5614	0	0	0	0	0	0	0	0	Northeast
220553	Jurema	PI	4748	2	0	6.018	0	0	0	0	0	Northeast
220554	Lagoinha do Piauí	PI	2831	0	0	0	0	2	0	10.092	0	Northeast
220555	Lagoa Alegre	PI	8504	0	0	0	0	0	0	0	0	Northeast
220556	Lagoa do Barro do Piauí	PI	4653	0	0	0	0	1	0	3.07	0	Northeast
220557	Lagoa de São Francisco	PI	6738	5	0	10.601	0	1	0	2.12	0	Northeast
220558	Lagoa do Piauí	PI	4052	1	0	3.526	0	0	0	0	0	Northeast
220559	Lagoa do Sítio	PI	5154	0	0	0	0	0	0	0	0	Northeast
220560	Landri Sales	PI	5307	0	0	0	0	0	0	0	0	Northeast
220570	Luís Correia	PI	30177	252	0	119.296	0	0	0	0	0	Northeast
220580	Luzilândia	PI	25467	0	0	0	0	1	0	0.561	0	Northeast
220585	Madeiro	PI	8276	0	0	0	0	0	0	0	0	Northeast
220590	Manoel Emídio	PI	5348	0	0	0	0	0	0	0	0	Northeast
220595	Marcolândia	PI	8439	1	0	1.693	0	0	0	0	0	Northeast
220600	Marcos Parente	PI	4550	0	0	0	0	0	0	0	0	Northeast
220605	Massapê do Piauí	PI	6434	3	0	6.661	0	0	0	0	0	Northeast
220610	Matias Olímpio	PI	10913	9	1	11.781	13.091	0	0	0	0	Northeast
220620	Miguel Alves	PI	33684	4	0	1.696	0	0	0	0	0	Northeast
220630	Miguel Leão	PI	1250	1	0	11.429	0	0	0	0	0	Northeast
220635	Milton Brandão	PI	6617	1	0	2.159	0	0	0	0	0	Northeast
220640	Monsenhor Gil	PI	10565	6	0	8.113	0	0	0	0	0	Northeast
220650	Monsenhor Hipólito	PI	7729	0	0	0	0	0	0	0	0	Northeast
220660	Monte Alegre do Piauí	PI	10611	5	0	6.732	0	0	0	0	0	Northeast
220665	Morro Cabeça no Tempo	PI	4533	0	0	0	0	0	0	0	0	Northeast
220667	Morro do Chapéu do Piauí	PI	6781	0	0	0	0	1	0	2.107	0	Northeast
220669	Murici dos Portelas	PI	9105	1	0	1.569	0	0	0	0	0	Northeast
220670	Nazaré do Piauí	PI	7356	0	0	0	0	0	0	0	0	Northeast
220672	Nazária	PI	8536	2	0	3.347	0	0	0	0	0	Northeast
220675	Nossa Senhora de Nazaré	PI	4847	1	0	2.947	0	0	0	0	0	Northeast
220680	Nossa Senhora dos Remédios	PI	8661	0	0	0	0	0	0	0	0	Northeast
220690	Novo Oriente do Piauí	PI	6575	1	0	2.173	0	0	0	0	0	Northeast
220695	Novo Santo Antônio	PI	2979	0	0	0	0	0	0	0	0	Northeast
220700	Oeiras	PI	36971	140	0	54.096	0	16	0	6.182	0	Northeast
220710	Olho D'Água do Piauí	PI	2449	0	0	0	0	0	0	0	0	Northeast
220720	Padre Marcos	PI	6862	0	0	0	0	0	0	0	0	Northeast
220730	Paes Landim	PI	4132	1	0	3.457	0	1	0	3.457	0	Northeast
220735	Pajeú do Piauí	PI	3375	0	0	0	0	0	0	0	0	Northeast
220740	Palmeira do Piauí	PI	5051	0	0	0	0	0	0	0	0	Northeast
220750	Palmeirais	PI	14488	1	0	0.986	0	0	0	0	0	Northeast
220755	Paquetá	PI	3953	0	0	0	0	0	0	0	0	Northeast
220760	Parnaguá	PI	10762	1	0	1.327	0	0	0	0	0	Northeast
220770	Parnaíba	PI	152653	1088	0	101.818	0	17	0	1.591	0	Northeast
220775	Passagem Franca do Piauí	PI	4302	1	0	3.321	0	0	0	0	0	Northeast
220777	Patos do Piauí	PI	6377	0	0	0	0	0	0	0	0	Northeast
220779	Pau D'Arco do Piauí	PI	4023	1	0	3.551	0	0	0	0	0	Northeast
220780	Paulistana	PI	20490	1	0	0.697	0	0	0	0	0	Northeast
220785	Pavussu	PI	3685	3	0	11.63	0	1	0	3.877	0	Northeast
220790	Pedro II	PI	38704	55	0	20.301	0	2	0	0.738	0	Northeast
220793	Pedro Laurentino	PI	2529	0	0	0	0	0	0	0	0	Northeast
220795	Nova Santa Rita	PI	4365	0	0	0	0	0	0	0	0	Northeast
220800	Picos	PI	78002	208	0	38.094	0	5	0	0.916	0	Northeast
220810	Pimenteiras	PI	12115	0	0	0	0	0	0	0	0	Northeast
220820	Pio IX	PI	18389	4	0	3.107	0	0	0	0	0	Northeast
220830	Piracuruca	PI	28703	5	0	2.489	0	0	0	0	0	Northeast
220840	Piripiri	PI	63694	85	0	19.064	0	32	0	7.177	0	Northeast
220850	Porto	PI	12526	1	0	1.14	0	1	0	1.14	0	Northeast
220855	Porto Alegre do Piauí	PI	2700	2	0	10.582	0	0	0	0	0	Northeast
220860	Prata do Piauí	PI	3153	0	0	0	0	0	0	0	0	Northeast
220865	Queimada Nova	PI	8966	0	0	0	0	0	0	0	0	Northeast
220870	Redenção do Gurguéia	PI	8758	0	0	0	0	2	0	3.262	0	Northeast
220880	Regeneração	PI	17978	1	0	0.795	0	0	0	0	0	Northeast
220885	Riacho Frio	PI	4316	7	0	23.17	0	0	0	0	0	Northeast
220887	Ribeira do Piauí	PI	4464	1	0	3.2	0	0	0	0	0	Northeast
220890	Ribeiro Gonçalves	PI	7305	2	0	3.911	0	0	0	0	0	Northeast
220900	Rio Grande do Piauí	PI	6431	0	0	0	0	0	0	0	0	Northeast
220910	Santa Cruz do Piauí	PI	6232	0	0	0	0	0	0	0	0	Northeast
220915	Santa Cruz dos Milagres	PI	4004	0	0	0	0	0	0	0	0	Northeast
220920	Santa Filomena	PI	6252	0	0	0	0	0	0	0	0	Northeast
220930	Santa Luz	PI	5836	0	0	0	0	0	0	0	0	Northeast
220935	Santana do Piauí	PI	4625	0	0	0	0	0	0	0	0	Northeast
220937	Santa Rosa do Piauí	PI	5258	1	0	2.717	0	0	0	0	0	Northeast
220940	Santo Antônio de Lisboa	PI	6388	0	0	0	0	0	0	0	0	Northeast
220945	Santo Antônio dos Milagres	PI	2155	0	0	0	0	0	0	0	0	Northeast
220950	Santo Inácio do Piauí	PI	3791	0	0	0	0	0	0	0	0	Northeast
220955	São Braz do Piauí	PI	4444	0	0	0	0	0	0	0	0	Northeast
220960	São Félix do Piauí	PI	2954	0	0	0	0	0	0	0	0	Northeast
220965	São Francisco de Assis do Piauí	PI	5731	0	0	0	0	2	0	4.985	0	Northeast
220970	São Francisco do Piauí	PI	6425	0	0	0	0	0	0	0	0	Northeast
220975	São Gonçalo do Gurguéia	PI	3025	1	0	4.723	0	0	0	0	0	Northeast
220980	São Gonçalo do Piauí	PI	4999	0	0	0	0	2	0	5.715	0	Northeast
220985	São João da Canabrava	PI	4602	0	0	0	0	0	0	0	0	Northeast
220987	São João da Fronteira	PI	6019	1	0	2.373	0	0	0	0	0	Northeast
220990	São João da Serra	PI	6157	1	0	2.32	0	0	0	0	0	Northeast
220995	São João da Varjota	PI	4832	1	0	2.956	0	1	0	2.956	0	Northeast
220997	São João do Arraial	PI	7937	45	0	80.995	0	2	0	3.6	0	Northeast
221000	São João do Piauí	PI	20537	2	1	1.391	6.956	0	0	0	0	Northeast
221005	São José do Divino	PI	5338	0	0	0	0	0	0	0	0	Northeast
221010	São José do Peixe	PI	3750	0	0	0	0	0	0	0	0	Northeast
221020	São José do Piauí	PI	6710	0	0	0	0	0	0	0	0	Northeast
221030	São Julião	PI	6353	2	2	4.497	44.973	0	0	0	0	Northeast
221035	São Lourenço do Piauí	PI	4568	1	0	3.127	0	0	0	0	0	Northeast
221037	São Luis do Piauí	PI	2642	0	0	0	0	0	0	0	0	Northeast
221038	São Miguel da Baixa Grande	PI	2449	0	0	0	0	0	0	0	0	Northeast
221039	São Miguel do Fidalgo	PI	3040	0	0	0	0	0	0	0	0	Northeast
221040	São Miguel do Tapuio	PI	17686	1	0	0.808	0	0	0	0	0	Northeast
221050	São Pedro do Piauí	PI	14255	11	0	11.024	0	1	0	1.002	0	Northeast
221060	São Raimundo Nonato	PI	34535	502	0	207.657	0	2	0	0.827	0	Northeast
221062	Sebastião Barros	PI	3488	0	0	0	0	0	0	0	0	Northeast
221063	Sebastião Leal	PI	4286	0	0	0	0	4	0	13.332	0	Northeast
221065	Sigefredo Pacheco	PI	10024	0	0	0	0	0	0	0	0	Northeast
221070	Simões	PI	14615	2	0	1.955	0	0	0	0	0	Northeast
221080	Simplício Mendes	PI	12675	0	0	0	0	0	0	0	0	Northeast
221090	Socorro do Piauí	PI	4576	0	0	0	0	0	0	0	0	Northeast
221093	Sussuapara	PI	6692	0	0	0	0	0	0	0	0	Northeast
221095	Tamboril do Piauí	PI	2908	0	0	0	0	0	0	0	0	Northeast
221097	Tanque do Piauí	PI	2756	0	0	0	0	0	0	0	0	Northeast
221100	Teresina	PI	861442	5130	5	85.073	0.829	62	0	1.028	0	Northeast
221110	União	PI	44396	0	0	0	0	1	0	0.322	0	Northeast
221120	Uruçuí	PI	21457	4	0	2.663	0	2	0	1.332	0	Northeast
221130	Valença do Piauí	PI	20906	0	0	0	0	1	0	0.683	0	Northeast
221135	Várzea Branca	PI	4956	45	0	129.713	0	0	0	0	0	Northeast
221140	Várzea Grande	PI	4397	2	0	6.498	0	0	0	0	0	Northeast
221150	Vera Mendes	PI	3075	0	0	0	0	0	0	0	0	Northeast
221160	Vila Nova do Piauí	PI	2990	22	0	105.112	0	0	0	0	0	Northeast
221170	Wall Ferraz	PI	4454	0	0	0	0	0	0	0	0	Northeast
230010	Abaiara	CE	11619	0	0	0	0	0	0	0	0	Northeast
230015	Acarape	CE	14820	68	0	65.548	0	0	0	0	0	Northeast
230020	Acaraú	CE	62165	79	0	18.154	0	1	0	0.23	0	Northeast
230030	Acopiara	CE	54052	1133	4	299.447	10.572	0	0	0	0	Northeast
230040	Aiuaba	CE	17303	0	0	0	0	0	0	0	0	Northeast
230050	Alcântaras	CE	11646	68	0	83.413	0	1	0	1.227	0	Northeast
230060	Altaneira	CE	7521	21	0	39.888	0	3	0	5.698	0	Northeast
230070	Alto Santo	CE	15938	4	0	3.585	0	1	0	0.896	0	Northeast
230075	Amontada	CE	43065	24	0	7.961	0	1	0	0.332	0	Northeast
230080	Antonina do North	CE	7328	53	0	103.322	0	0	0	0	0	Northeast
230090	Apuiarés	CE	14527	127	0	124.891	0	0	0	0	0	Northeast
230100	Aquiraz	CE	79590	457	1	82.028	1.795	3	0	0.538	0	Northeast
230110	Aracati	CE	74106	2535	4	488.682	7.711	8	0	1.542	0	Northeast
230120	Aracoiaba	CE	26400	375	2	202.922	10.823	0	0	0	0	Northeast
230125	Ararendá	CE	10911	166	0	217.343	0	0	0	0	0	Northeast
230130	Araripe	CE	21544	90	0	59.679	0	0	0	0	0	Northeast
230140	Aratuba	CE	11893	143	0	171.77	0	2	0	2.402	0	Northeast
230150	Arneiroz	CE	7836	5	0	9.115	0	0	0	0	0	Northeast
230160	Assaré	CE	23355	254	0	155.366	0	0	0	0	0	Northeast
230170	Aurora	CE	24699	1	0	0.578	0	0	0	0	0	Northeast
230180	Baixio	CE	6272	14	0	31.888	0	0	0	0	0	Northeast
230185	Banabuiú	CE	18138	50	0	39.381	0	0	0	0	0	Northeast
230190	Barbalha	CE	60324	200	1	47.363	2.368	14	0	3.315	0	Northeast
230195	Barreira	CE	22276	507	1	325.142	6.413	1	0	0.641	0	Northeast
230200	Barro	CE	22600	3	0	1.896	0	0	0	0	0	Northeast
230205	Barroquinha	CE	14989	25	0	23.827	0	0	0	0	0	Northeast
230210	Baturité	CE	35554	667	1	268.003	4.018	0	0	0	0	Northeast
230220	Beberibe	CE	53187	363	2	97.5	5.372	0	0	0	0	Northeast
230230	Bela Cruz	CE	32455	23	0	10.124	0	0	0	0	0	Northeast
230240	Boa Viagem	CE	54360	302	0	79.365	0	12	0	3.154	0	Northeast
230250	Brejo Santo	CE	49103	976	0	283.951	0	28	0	8.146	0	Northeast
230260	Camocim	CE	63408	166	0	37.4	0	0	0	0	0	Northeast
230270	Campos Sales	CE	27380	586	0	305.75	0	0	0	0	0	Northeast
230280	Canindé	CE	76744	1995	0	371.365	0	1	0	0.186	0	Northeast
230290	Capistrano	CE	17690	309	0	249.536	0	0	0	0	0	Northeast
230300	Caridade	CE	22304	378	0	242.109	0	0	0	0	0	Northeast
230310	Cariré	CE	18438	94	0	72.831	0	13	0	10.072	0	Northeast
230320	Caririaçu	CE	26943	8	0	4.242	0	1	0	0.53	0	Northeast
230330	Cariús	CE	18698	11	1	8.404	7.64	0	0	0	0	Northeast
230340	Carnaubal	CE	17526	4	0	3.26	0	0	0	0	0	Northeast
230350	Cascavel	CE	71244	1269	0	254.458	0	4	0	0.802	0	Northeast
230360	Catarina	CE	20518	553	0	385.028	0	7	0	4.874	0	Northeast
230365	Catunda	CE	10307	1	0	1.386	0	1	0	1.386	0	Northeast
230370	Caucaia	CE	357487	6182	10	247.042	3.996	578	0	23.098	0	Northeast
230380	Cedro	CE	25528	33	0	18.467	0	1	0	0.56	0	Northeast
230390	Chaval	CE	13047	66	0	72.266	0	0	0	0	0	Northeast
230393	Choró	CE	13476	47	0	49.824	0	0	0	0	0	Northeast
230395	Chorozinho	CE	20251	133	0	93.823	0	0	0	0	0	Northeast
230400	Coreaú	CE	23030	515	0	319.459	0	3	0	1.861	0	Northeast
230410	Crateús	CE	74987	2757	2	525.234	3.81	184	0	35.054	0	Northeast
230420	Crato	CE	131192	419	0	45.626	0	3	0	0.327	0	Northeast
230423	Croatá	CE	17991	4	0	3.176	0	0	0	0	0	Northeast
230425	Cruz	CE	24676	15	0	8.684	0	1	0	0.579	0	Northeast
230426	Deputado Irapuan Pinheiro	CE	9587	13	0	19.371	0	0	0	0	0	Northeast
230427	Ereré	CE	7169	3	0	5.978	0	0	0	0	0	Northeast
230428	Eusébio	CE	52880	192	0	51.869	0	4	0	1.081	0	Northeast
230430	Farias Brito	CE	19513	19	0	13.91	0	0	0	0	0	Northeast
230435	Forquilha	CE	23978	37	1	22.044	5.958	0	0	0	0	Northeast
230440	Fortaleza	CE	2651632	81089	172	436.868	9.267	1642	0	8.846	0	Northeast
230445	Fortim	CE	16326	270	0	236.258	0	8	0	7	0	Northeast
230450	Frecheirinha	CE	14008	93	0	94.844	0	1	0	1.02	0	Northeast
230460	General Sampaio	CE	7540	148	0	280.409	0	0	0	0	0	Northeast
230465	Graça	CE	14391	6	1	5.956	9.927	0	0	0	0	Northeast
230470	Granja	CE	54528	507	0	132.828	0	2	0	0.524	0	Northeast
230480	Granjeiro	CE	4875	0	0	0	0	0	0	0	0	Northeast
230490	Groaíras	CE	10988	13	0	16.902	0	0	0	0	0	Northeast
230495	Guaiúba	CE	25834	42	0	23.225	0	0	0	0	0	Northeast
230500	Guaraciaba do North	CE	40496	1	0	0.353	0	0	0	0	0	Northeast
230510	Guaramiranga	CE	5255	53	0	144.08	0	1	0	2.718	0	Northeast
230520	Hidrolândia	CE	19900	431	0	309.404	0	50	0	35.894	0	Northeast
230523	Horizonte	CE	66114	745	2	160.977	4.322	23	0	4.97	0	Northeast
230526	Ibaretama	CE	13335	54	0	57.85	0	0	0	0	0	Northeast
230530	Ibiapina	CE	24909	6	0	3.441	0	0	0	0	0	Northeast
230533	Ibicuitinga	CE	12419	133	0	152.991	0	0	0	0	0	Northeast
230535	Icapuí	CE	19804	477	0	344.086	0	18	0	12.984	0	Northeast
230540	Icó	CE	67869	647	0	136.187	0	9	0	1.894	0	Northeast
230550	Iguatu	CE	101908	1406	0	197.097	0	0	0	0	0	Northeast
230560	Independência	CE	26168	670	0	365.768	0	123	0	67.149	0	Northeast
230565	Ipaporanga	CE	11591	7	0	8.627	0	0	0	0	0	Northeast
230570	Ipaumirim	CE	12439	26	0	29.86	0	0	0	0	0	Northeast
230580	Ipu	CE	41869	247	1	84.276	3.412	76	0	25.931	0	Northeast
230590	Ipueiras	CE	38219	85	0	31.772	0	0	0	0	0	Northeast
230600	Iracema	CE	14269	17	0	17.02	0	2	0	2.002	0	Northeast
230610	Irauçuba	CE	24003	344	0	204.736	0	0	0	0	0	Northeast
230620	Itaiçaba	CE	7787	56	0	102.735	0	1	0	1.835	0	Northeast
230625	Itaitinga	CE	37629	253	2	96.051	7.593	3	0	1.139	0	Northeast
230630	Itapajé	CE	52273	385	2	105.217	5.466	0	0	0	0	Northeast
230640	Itapipoca	CE	128147	1421	0	158.412	0	2	0	0.223	0	Northeast
230650	Itapiúna	CE	20243	174	1	122.794	7.057	1	0	0.706	0	Northeast
230655	Itarema	CE	41425	75	1	25.864	3.449	0	0	0	0	Northeast
230660	Itatira	CE	21455	538	0	358.225	0	6	0	3.995	0	Northeast
230670	Jaguaretama	CE	18177	51	1	40.082	7.859	0	0	0	0	Northeast
230680	Jaguaribara	CE	11309	115	0	145.27	0	2	0	2.526	0	Northeast
230690	Jaguaribe	CE	34729	50	0	20.567	0	2	0	0.823	0	Northeast
230700	Jaguaruana	CE	33571	146	0	62.128	0	0	0	0	0	Northeast
230710	Jardim	CE	27167	2	0	1.052	0	1	0	0.526	0	Northeast
230720	Jati	CE	8090	22	0	38.849	0	0	0	0	0	Northeast
230725	Jijoca de Jericoacoara	CE	19536	25	0	18.281	0	0	0	0	0	Northeast
230730	Juazeiro do North	CE	272095	232	2	12.181	1.05	2	0	0.105	0	Northeast
230740	Jucás	CE	24773	11	0	6.343	0	0	0	0	0	Northeast
230750	Lavras da Mangabeira	CE	31526	24	0	10.875	0	1	0	0.453	0	Northeast
230760	Limoeiro do North	CE	59180	150	0	36.209	0	14	0	3.38	0	Northeast
230763	Madalena	CE	19513	187	0	136.905	0	0	0	0	0	Northeast
230765	Maracanaú	CE	226273	2629	3	165.982	1.894	36	0	2.273	0	Northeast
230770	Maranguape	CE	127574	2000	3	223.96	3.359	28	0	3.135	0	Northeast
230780	Marco	CE	27121	300	1	158.022	5.267	23	0	12.115	0	Northeast
230790	Martinópole	CE	11143	119	0	152.562	0	0	0	0	0	Northeast
230800	Massapê	CE	38423	385	1	143.143	3.718	6	0	2.231	0	Northeast
230810	Mauriti	CE	47750	230	0	68.811	0	5	0	1.496	0	Northeast
230820	Meruoca	CE	14926	74	0	70.826	0	0	0	0	0	Northeast
230830	Milagres	CE	27563	682	0	353.476	0	1	0	0.518	0	Northeast
230835	Milhã	CE	13169	2	0	2.17	0	1	0	1.085	0	Northeast
230837	Miraíma	CE	13742	52	0	54.057	0	0	0	0	0	Northeast
230840	Missão Velha	CE	35303	12	0	4.856	0	1	0	0.405	0	Northeast
230850	Mombaça	CE	43735	115	0	37.564	0	0	0	0	0	Northeast
230860	Monsenhor Tabosa	CE	17218	3	0	2.489	0	0	0	0	0	Northeast
230870	Morada Nova	CE	62047	179	1	41.213	2.302	0	0	0	0	Northeast
230880	Moraújo	CE	8667	2	0	3.297	0	90	0	148.346	0	Northeast
230890	Morrinhos	CE	22379	22	0	14.044	0	0	0	0	0	Northeast
230900	Mucambo	CE	14524	24	0	23.606	0	3	0	2.951	0	Northeast
230910	Mulungu	CE	10702	50	0	66.743	0	5	0	6.674	0	Northeast
230920	Nova Olinda	CE	15444	2	0	1.85	0	0	0	0	0	Northeast
230930	Nova Russas	CE	32244	1230	0	544.952	0	0	0	0	0	Northeast
230940	Novo Oriente	CE	28539	382	0	191.217	0	0	0	0	0	Northeast
230945	Ocara	CE	25571	476	0	265.926	0	0	0	0	0	Northeast
230950	Orós	CE	21471	29	0	19.295	0	0	0	0	0	Northeast
230960	Pacajus	CE	71193	214	2	42.942	4.013	2	0	0.401	0	Northeast
230970	Pacatuba	CE	82278	1379	2	239.432	3.473	4	0	0.695	0	Northeast
230980	Pacoti	CE	12235	89	0	103.917	0	0	0	0	0	Northeast
230990	Pacujá	CE	6516	11	0	24.116	0	1	0	2.192	0	Northeast
231000	Palhano	CE	9348	148	0	226.175	0	0	0	0	0	Northeast
231010	Palmácia	CE	13202	103	0	111.455	0	1	0	1.082	0	Northeast
231020	Paracuru	CE	34842	388	0	159.086	0	26	0	10.66	0	Northeast
231025	Paraipaba	CE	32491	60	1	26.381	4.397	0	0	0	0	Northeast
231030	Parambu	CE	31589	11	0	4.975	0	0	0	0	0	Northeast
231040	Paramoti	CE	12202	22	1	25.757	11.708	0	0	0	0	Northeast
231050	Pedra Branca	CE	43205	258	0	85.308	0	1	0	0.331	0	Northeast
231060	Penaforte	CE	9010	3	0	4.757	0	0	0	0	0	Northeast
231070	Pentecoste	CE	37599	2082	5	791.054	18.997	0	0	0	0	Northeast
231080	Pereiro	CE	16281	133	0	116.7	0	9	0	7.897	0	Northeast
231085	Pindoretama	CE	20360	334	0	234.353	0	1	0	0.702	0	Northeast
231090	Piquet Carneiro	CE	16829	425	1	360.772	8.489	1	0	0.849	0	Northeast
231095	Pires Ferreira	CE	10897	10	0	13.11	0	2	0	2.622	0	Northeast
231100	Poranga	CE	12325	0	0	0	0	2	0	2.318	0	Northeast
231110	Porteiras	CE	15035	5	0	4.751	0	0	0	0	0	Northeast
231120	Potengi	CE	10983	9	0	11.706	0	0	0	0	0	Northeast
231123	Potiretama	CE	6400	4	0	8.929	0	0	0	0	0	Northeast
231126	Quiterianópolis	CE	21000	27	0	18.367	0	0	0	0	0	Northeast
231130	Quixadá	CE	87120	1698	3	278.434	4.919	4	0	0.656	0	Northeast
231135	Quixelô	CE	16210	32	0	28.201	0	0	0	0	0	Northeast
231140	Quixeramobim	CE	80368	2311	1	410.789	1.778	10	0	1.778	0	Northeast
231150	Quixeré	CE	22002	814	0	528.523	0	21	0	13.635	0	Northeast
231160	Redenção	CE	28955	325	0	160.347	0	0	0	0	0	Northeast
231170	Reriutaba	CE	18603	606	1	465.363	7.679	46	0	35.325	0	Northeast
231180	Russas	CE	77490	889	0	163.892	0	0	0	0	0	Northeast
231190	Saboeiro	CE	15852	72	0	64.886	0	0	0	0	0	Northeast
231195	Salitre	CE	16470	48	0	41.634	0	1	0	0.867	0	Northeast
231200	Santana do Acaraú	CE	32244	163	0	72.217	0	0	0	0	0	Northeast
231210	Santana do Cariri	CE	17686	6	0	4.846	0	0	0	0	0	Northeast
231220	Santa Quitéria	CE	43695	368	0	120.315	0	2	0	0.654	0	Northeast
231230	São Benedito	CE	47668	6	0	1.798	0	0	0	0	0	Northeast
231240	São Gonçalo do Amarante	CE	47962	849	0	252.879	0	1	0	0.298	0	Northeast
231250	São João do Jaguaribe	CE	7691	3	0	5.572	0	5	0	9.287	0	Northeast
231260	São Luís do Curu	CE	12956	95	0	104.75	0	1	0	1.103	0	Northeast
231270	Senador Pompeu	CE	25537	255	1	142.65	5.594	0	0	0	0	Northeast
231280	Senador Sá	CE	7553	48	0	90.787	0	0	0	0	0	Northeast
231290	Sobral	CE	207114	1589	0	109.601	0	19	0	1.311	0	Northeast
231300	Solonópole	CE	18291	321	0	250.709	0	0	0	0	0	Northeast
231310	Tabuleiro do North	CE	31744	26	0	11.701	0	2	0	0.9	0	Northeast
231320	Tamboril	CE	26280	159	1	86.432	5.436	1	0	0.544	0	Northeast
231325	Tarrafas	CE	8612	2	0	3.318	0	0	0	0	0	Northeast
231330	Tauá	CE	58651	224	0	54.56	0	1	0	0.244	0	Northeast
231335	Tejuçuoca	CE	18998	158	0	118.809	0	0	0	0	0	Northeast
231340	Tianguá	CE	75341	27	0	5.12	0	1	0	0.19	0	Northeast
231350	Trairi	CE	55535	92	1	23.666	2.572	1	0	0.257	0	Northeast
231355	Tururu	CE	16107	113	0	100.223	0	3	0	2.661	0	Northeast
231360	Ubajara	CE	34530	8	0	3.31	0	0	0	0	0	Northeast
231370	Umari	CE	7729	11	0	20.332	0	0	0	0	0	Northeast
231375	Umirim	CE	19747	184	1	133.112	7.234	0	0	0	0	Northeast
231380	Uruburetama	CE	21656	169	0	111.483	0	2	0	1.319	0	Northeast
231390	Uruoca	CE	13763	261	0	270.913	0	102	0	105.874	0	Northeast
231395	Varjota	CE	18368	88	1	68.442	7.778	6	0	4.667	0	Northeast
231400	Várzea Alegre	CE	40536	64	0	22.555	0	0	0	0	0	Northeast
231410	Viçosa do Ceará	CE	60355	44	1	10.415	2.367	25	0	5.917	0	Northeast
240010	Acari	RN	11152	248	0	317.688	0	1	0	1.281	0	Northeast
240020	Açu	RN	57644	620	0	153.652	0	48	0	11.896	0	Northeast
240030	Afonso Bezerra	RN	11041	129	0	166.91	0	20	0	25.878	0	Northeast
240040	Água Nova	RN	3230	13	0	57.497	0	0	0	0	0	Northeast
240050	Alexandria	RN	13602	3	1	3.151	10.503	4	0	4.201	0	Northeast
240060	Almino Afonso	RN	4761	0	0	0	0	0	0	0	0	Northeast
240070	Alto do Rodrigues	RN	14326	3	0	2.992	0	0	0	0	0	Northeast
240080	Angicos	RN	11724	38	0	46.303	0	3	0	3.656	0	Northeast
240090	Antônio Martins	RN	7137	1	0	2.002	0	0	0	0	0	Northeast
240100	Apodi	RN	35814	8	0	3.191	0	0	0	0	0	Northeast
240110	Areia Branca	RN	27577	12	0	6.216	0	1	0	0.518	0	Northeast
240120	Arês	RN	14192	10	0	10.066	0	0	0	0	0	Northeast
240130	Campo Grande	RN	9638	2	1	2.964	14.822	0	0	0	0	Northeast
240140	Baía Formosa	RN	9218	11	1	17.047	15.498	26	0	40.294	0	Northeast
240145	Baraúna	RN	27994	145	0	73.995	0	19	0	9.696	0	Northeast
240150	Barcelona	RN	4002	7	0	24.988	0	2	0	7.139	0	Northeast
240160	Bento Fernandes	RN	5469	1	0	2.612	0	0	0	0	0	Northeast
240165	Bodó	RN	2250	1	0	6.349	0	2	0	12.698	0	Northeast
240170	Bom Jesus	RN	10152	50	0	70.359	0	0	0	0	0	Northeast
240180	Brejinho	RN	12609	22	0	24.926	0	1	0	1.133	0	Northeast
240185	Caiçara do North	RN	6537	2	0	4.371	0	0	0	0	0	Northeast
240190	Caiçara do Rio do Vento	RN	3652	4	0	15.647	0	1	0	3.912	0	Northeast
240200	Caicó	RN	67554	338	0	71.477	0	4	1	0.846	2.115	Northeast
240210	Campo Redondo	RN	11142	12	0	15.386	0	0	0	0	0	Northeast
240220	Canguaretama	RN	33999	104	1	43.699	4.202	18	0	7.563	0	Northeast
240230	Caraúbas	RN	20443	6	0	4.193	0	0	0	0	0	Northeast
240240	Carnaúba dos Dantas	RN	8119	5	0	8.798	0	1	0	1.76	0	Northeast
240250	Carnaubais	RN	10651	252	0	337.996	0	0	0	0	0	Northeast
240260	Ceará-Mirim	RN	73099	29	3	5.667	5.863	14	1	2.736	1.954	Northeast
240270	Cerro Corá	RN	11178	0	0	0	0	2	0	2.556	0	Northeast
240280	Coronel Ezequiel	RN	5508	67	0	173.773	0	43	0	111.526	0	Northeast
240290	Coronel João Pessoa	RN	4908	1	0	2.911	0	0	0	0	0	Northeast
240300	Cruzeta	RN	8014	0	0	0	0	0	0	0	0	Northeast
240310	Currais Novos	RN	44664	57	12	18.231	38.382	11	1	3.518	3.198	Northeast
240320	Doutor Severiano	RN	7080	18	0	36.32	0	0	0	0	0	Northeast
240325	Parnamirim	RN	255793	514	4	28.706	2.234	41	0	2.29	0	Northeast
240330	Encanto	RN	5608	2	1	5.095	25.474	0	0	0	0	Northeast
240340	Equador	RN	6036	3	1	7.1	23.668	0	0	0	0	Northeast
240350	Espírito Santo	RN	10527	2	0	2.714	0	1	0	1.357	0	Northeast
240360	Extremoz	RN	28222	53	1	26.828	5.062	0	0	0	0	Northeast
240370	Felipe Guerra	RN	5972	0	0	0	0	0	0	0	0	Northeast
240375	Fernando Pedroza	RN	3039	22	0	103.417	0	17	0	79.914	0	Northeast
240380	Florânia	RN	9814	7	0	10.19	0	1	0	1.456	0	Northeast
240390	Francisco Dantas	RN	2836	17	0	85.634	0	0	0	0	0	Northeast
240400	Frutuoso Gomes	RN	4095	1	0	3.489	0	1	0	3.489	0	Northeast
240410	Galinhos	RN	2726	8	0	41.924	0	0	0	0	0	Northeast
240420	Goianinha	RN	25980	6	1	3.299	5.499	3	0	1.65	0	Northeast
240430	Governador Dix-Sept Rosado	RN	12997	15	0	16.487	0	0	0	0	0	Northeast
240440	Grossos	RN	10302	3	0	4.16	0	1	0	1.387	0	Northeast
240450	Guamaré	RN	15349	421	1	391.836	9.307	1	0	0.931	0	Northeast
240460	Ielmo Marinho	RN	13628	1	0	1.048	0	0	0	0	0	Northeast
240470	Ipanguaçu	RN	15354	1	0	0.93	0	1	0	0.93	0	Northeast
240480	Ipueira	RN	2228	0	0	0	0	0	0	0	0	Northeast
240485	Itajá	RN	7501	1	0	1.905	0	0	0	0	0	Northeast
240490	Itaú	RN	5858	10	0	24.387	0	0	0	0	0	Northeast
240500	Jaçanã	RN	9026	110	0	174.1	0	21	0	33.237	0	Northeast
240510	Jandaíra	RN	6863	2	0	4.163	0	0	0	0	0	Northeast
240520	Janduís	RN	5289	5	0	13.505	0	2	0	5.402	0	Northeast
240530	Januário Cicco	RN	10087	54	0	76.478	0	0	0	0	0	Northeast
240540	Japi	RN	5117	30	0	83.754	0	0	0	0	0	Northeast
240550	Jardim de Angicos	RN	2617	0	0	0	0	1	0	5.459	0	Northeast
240560	Jardim de Piranhas	RN	14730	6	0	5.819	0	7	0	6.789	0	Northeast
240570	Jardim do Seridó	RN	12395	166	2	191.321	23.051	1	1	1.153	11.525	Northeast
240580	João Câmara	RN	34747	25	5	10.278	20.557	9	0	3.7	0	Northeast
240590	João Dias	RN	2655	0	0	0	0	0	0	0	0	Northeast
240600	José da Penha	RN	5957	1	0	2.398	0	1	0	2.398	0	Northeast
240610	Jucurutu	RN	18274	6	0	4.691	0	19	0	14.853	0	Northeast
240615	Jundiá	RN	3873	3	0	11.066	0	0	0	0	0	Northeast
240620	Lagoa d'Anta	RN	6728	4	0	8.493	0	0	0	0	0	Northeast
240630	Lagoa de Pedras	RN	7503	2	1	3.808	19.04	0	0	0	0	Northeast
240640	Lagoa de Velhos	RN	2731	19	0	99.388	0	2	0	10.462	0	Northeast
240650	Lagoa Nova	RN	15477	19	0	17.538	0	0	0	0	0	Northeast
240660	Lagoa Salgada	RN	8192	2	0	3.488	0	0	0	0	0	Northeast
240670	Lajes	RN	11208	6	0	7.648	0	0	0	0	0	Northeast
240680	Lajes Pintadas	RN	4755	162	0	486.706	0	1	0	3.004	0	Northeast
240690	Lucrécia	RN	3966	8	2	28.816	72.041	0	0	0	0	Northeast
240700	Luís Gomes	RN	10086	50	0	70.82	0	0	0	0	0	Northeast
240710	Macaíba	RN	79743	372	2	66.643	3.583	10	0	1.791	0	Northeast
240720	Macau	RN	31584	28	0	12.665	0	0	0	0	0	Northeast
240725	Major Sales	RN	3978	0	0	0	0	0	0	0	0	Northeast
240730	Marcelino Vieira	RN	8358	61	0	104.263	0	0	0	0	0	Northeast
240740	Martins	RN	8692	0	0	0	0	0	0	0	0	Northeast
240750	Maxaranguape	RN	12194	3	0	3.515	0	0	0	0	0	Northeast
240760	Messias Targino	RN	4568	93	0	290.843	0	6	0	18.764	0	Northeast
240770	Montanhas	RN	11295	3	0	3.794	0	0	0	0	0	Northeast
240780	Monte Alegre	RN	22325	5	1	3.199	6.399	1	0	0.64	0	Northeast
240790	Monte das Gameleiras	RN	2127	5	0	33.582	0	0	0	0	0	Northeast
240800	Mossoró	RN	294076	7907	23	384.109	11.173	222	0	10.784	0	Northeast
240810	Natal	RN	877640	4208	49	68.495	7.976	99	3	1.611	0.488	Northeast
240820	Nísia Floresta	RN	27260	62	0	32.491	0	0	0	0	0	Northeast
240830	Nova Cruz	RN	37233	420	0	161.147	0	3	0	1.151	0	Northeast
240840	Olho d'Água do Borges	RN	4272	42	0	140.449	0	0	0	0	0	Northeast
240850	Ouro Branco	RN	4812	2	0	5.938	0	0	0	0	0	Northeast
240860	Paraná	RN	4232	41	0	138.401	0	0	0	0	0	Northeast
240870	Paraú	RN	3787	0	0	0	0	2	0	7.545	0	Northeast
240880	Parazinho	RN	5201	30	0	82.402	0	10	0	27.467	0	Northeast
240890	Parelhas	RN	21408	229	1	152.813	6.673	3	1	2.002	6.673	Northeast
240895	Rio do Fogo	RN	10789	0	0	0	0	0	0	0	0	Northeast
240910	Passa e Fica	RN	13076	588	0	642.398	0	5	0	5.463	0	Northeast
240920	Passagem	RN	3075	1	0	4.646	0	0	0	0	0	Northeast
240930	Patu	RN	12701	24	0	26.994	0	0	0	0	0	Northeast
240933	Santa Maria	RN	5480	6	0	15.641	0	0	0	0	0	Northeast
240940	Pau dos Ferros	RN	30183	22	1	10.413	4.733	2	0	0.947	0	Northeast
240950	Pedra Grande	RN	3275	6	0	26.172	0	0	0	0	0	Northeast
240960	Pedra Preta	RN	2478	0	0	0	0	1	0	5.765	0	Northeast
240970	Pedro Avelino	RN	6780	12	2	25.284	42.141	0	0	0	0	Northeast
240980	Pedro Velho	RN	14767	2	0	1.935	0	0	0	0	0	Northeast
240990	Pendências	RN	14984	3	0	2.86	0	0	0	0	0	Northeast
241000	Pilões	RN	3806	2	0	7.507	0	0	0	0	0	Northeast
241010	Poço Branco	RN	15294	6	1	5.604	9.341	0	0	0	0	Northeast
241020	Portalegre	RN	7827	26	0	47.455	0	0	0	0	0	Northeast
241025	Porto do Mangue	RN	6350	4	0	8.999	0	0	0	0	0	Northeast
241030	Serra Caiada	RN	10266	5	0	6.958	0	0	0	0	0	Northeast
241040	Pureza	RN	9516	1	0	1.501	0	0	0	0	0	Northeast
241050	Rafael Fernandes	RN	5067	3	0	8.458	0	0	0	0	0	Northeast
241060	Rafael Godeiro	RN	3194	0	0	0	0	0	0	0	0	Northeast
241070	Riacho da Cruz	RN	3543	5	0	20.16	0	1	0	4.032	0	Northeast
241080	Riacho de Santana	RN	4209	0	0	0	0	0	0	0	0	Northeast
241090	Riachuelo	RN	8034	3	0	5.334	0	0	0	0	0	Northeast
241100	Rodolfo Fernandes	RN	4472	1	0	3.194	0	0	0	0	0	Northeast
241105	Tibau	RN	4071	3	0	10.527	0	0	0	0	0	Northeast
241110	Ruy Barbosa	RN	3608	43	0	170.257	0	1	0	3.959	0	Northeast
241120	Santa Cruz	RN	39355	600	2	217.798	7.26	80	0	29.04	0	Northeast
241140	Santana do Matos	RN	12261	8	0	9.321	0	0	0	0	0	Northeast
241142	Santana do Seridó	RN	2670	2	0	10.701	0	0	0	0	0	Northeast
241150	Santo Antônio	RN	23988	77	0	45.856	0	4	0	2.382	0	Northeast
241160	São Bento do North	RN	2778	0	0	0	0	0	0	0	0	Northeast
241170	São Bento do Trairí	RN	4401	32	0	103.872	0	1	0	3.246	0	Northeast
241180	São Fernando	RN	3573	2	0	7.996	0	0	0	0	0	Northeast
241190	São Francisco do Oeste	RN	4200	11	0	37.415	0	1	0	3.401	0	Northeast
241200	São Gonçalo do Amarante	RN	101102	96	4	13.565	5.652	7	0	0.989	0	Northeast
241210	São João do Sabugi	RN	6179	3	0	6.936	0	1	1	2.312	23.12	Northeast
241220	São José de Mipibu	RN	43554	255	0	83.64	0	6	0	1.968	0	Northeast
241230	São José do Campestre	RN	12833	132	0	146.943	0	4	0	4.453	0	Northeast
241240	São José do Seridó	RN	4602	3	0	9.313	0	0	0	0	0	Northeast
241250	São Miguel	RN	23380	8	1	4.888	6.11	2	0	1.222	0	Northeast
241255	São Miguel do Gostoso	RN	10201	0	0	0	0	2	0	2.801	0	Northeast
241260	São Paulo do Potengi	RN	17436	353	0	289.221	0	3	0	2.458	0	Northeast
241270	São Pedro	RN	6014	1	0	2.375	0	0	0	0	0	Northeast
241280	São Rafael	RN	8212	3	1	5.219	17.396	2	0	3.479	0	Northeast
241290	São Tomé	RN	11057	16	1	20.672	12.92	1	0	1.292	0	Northeast
241300	São Vicente	RN	6397	138	0	308.18	0	0	0	0	0	Northeast
241310	Senador Elói de Souza	RN	6044	3	1	7.091	23.636	0	0	0	0	Northeast
241320	Senador Georgino Avelino	RN	4395	4	1	13.002	32.504	0	0	0	0	Northeast
241330	Serra de São Bento	RN	5774	8	0	19.793	0	0	0	0	0	Northeast
241335	Serra do Mel	RN	11790	22	0	26.657	0	0	0	0	0	Northeast
241340	Serra Negra do North	RN	8065	3	0	5.314	0	0	0	0	0	Northeast
241350	Serrinha	RN	6281	75	0	170.582	0	3	0	6.823	0	Northeast
241355	Serrinha dos Pintos	RN	4784	3	0	8.958	0	12	0	35.834	0	Northeast
241360	Severiano Melo	RN	2799	2	0	10.208	0	0	0	0	0	Northeast
241370	Sítio Novo	RN	5481	9	0	23.458	0	0	0	0	0	Northeast
241380	Taboleiro Grande	RN	2545	6	0	33.679	0	0	0	0	0	Northeast
241390	Taipu	RN	12261	11	0	12.816	0	1	0	1.165	0	Northeast
241400	Tangará	RN	15581	6	0	5.501	0	0	0	0	0	Northeast
241410	Tenente Ananias	RN	10715	43	0	57.33	0	0	0	0	0	Northeast
241415	Tenente Laurentino Cruz	RN	5883	3	0	7.285	0	1	0	2.428	0	Northeast
241420	Tibau do Sul	RN	13916	9	0	9.239	0	0	0	0	0	Northeast
241430	Timbaúba dos Batistas	RN	2407	0	0	0	0	0	0	0	0	Northeast
241440	Touros	RN	33064	8	0	3.456	0	3	0	1.296	0	Northeast
241445	Triunfo Potiguar	RN	3259	28	0	122.737	0	0	0	0	0	Northeast
241450	Umarizal	RN	10591	0	0	0	0	0	0	0	0	Northeast
241460	Upanema	RN	14516	239	0	235.208	0	44	0	43.302	0	Northeast
241470	Várzea	RN	5485	61	0	158.875	0	0	0	0	0	Northeast
241475	Venha-Ver	RN	4149	0	0	0	0	0	0	0	0	Northeast
241480	Vera Cruz	RN	12323	2	0	2.319	0	0	0	0	0	Northeast
241490	Viçosa	RN	1712	31	0	258.678	0	0	0	0	0	Northeast
241500	Vila Flor	RN	3146	1	0	4.541	0	4	0	18.164	0	Northeast
250010	Água Branca	PB	10161	7	0	9.842	0	2	0	2.812	0	Northeast
250020	Aguiar	PB	5649	0	0	0	0	0	0	0	0	Northeast
250030	Alagoa Grande	PB	28555	1005	2	502.789	10.006	287	0	143.583	0	Northeast
250040	Alagoa Nova	PB	20776	375	0	257.852	0	160	0	110.017	0	Northeast
250050	Alagoinha	PB	14418	20	0	19.816	0	2	0	1.982	0	Northeast
250053	Alcantil	PB	5473	0	0	0	0	1	0	2.61	0	Northeast
250057	Algodão de Jandaíra	PB	2556	17	0	95.015	0	7	0	39.124	0	Northeast
250060	Alhandra	PB	19444	102	1	74.94	7.347	1	0	0.735	0	Northeast
250070	São João do Rio do Peixe	PB	18043	10	0	7.918	0	0	0	0	0	Northeast
250073	Amparo	PB	2224	17	0	109.198	0	0	0	0	0	Northeast
250077	Aparecida	PB	8276	0	0	0	0	0	0	0	0	Northeast
250080	Araçagi	PB	17054	116	0	97.17	0	0	0	0	0	Northeast
250090	Arara	PB	13396	7	0	7.465	0	1	0	1.066	0	Northeast
250100	Araruna	PB	20159	64	0	45.354	0	5	0	3.543	0	Northeast
250110	Areia	PB	22988	110	0	68.359	0	48	0	29.829	0	Northeast
250115	Areia de Baraúnas	PB	2140	47	0	313.752	0	0	0	0	0	Northeast
250120	Areial	PB	6969	4	1	8.2	20.499	2	0	4.1	0	Northeast
250130	Aroeiras	PB	19190	18	1	13.4	7.444	10	0	7.444	0	Northeast
250135	Assunção	PB	3950	8	0	28.933	0	1	0	3.617	0	Northeast
250140	Baía da Traição	PB	8887	0	0	0	0	0	0	0	0	Northeast
250150	Bananeiras	PB	21369	77	0	51.476	0	1	0	0.669	0	Northeast
250153	Baraúna	PB	4820	14	0	41.494	0	1	0	2.964	0	Northeast
250157	Barra de Santana	PB	8368	89	1	151.939	17.072	11	0	18.779	0	Northeast
250160	Barra de Santa Rosa	PB	15268	99	0	92.631	0	3	0	2.807	0	Northeast
250170	Barra de São Miguel	PB	6004	11	0	26.173	0	1	0	2.379	0	Northeast
250180	Bayeux	PB	96550	184	2	27.225	2.959	7	0	1.036	0	Northeast
250190	Belém	PB	17647	282	0	228.286	0	0	0	0	0	Northeast
250200	Belém do Brejo do Cruz	PB	7335	25	0	48.69	0	0	0	0	0	Northeast
250205	Bernardino Batista	PB	3465	18	0	74.212	0	0	0	0	0	Northeast
250210	Boa Ventura	PB	5428	2	0	5.264	0	0	0	0	0	Northeast
250215	Boa Vista	PB	6965	16	0	32.817	0	11	0	22.562	0	Northeast
250220	Bom Jesus	PB	2547	4	0	22.435	0	2	0	11.218	0	Northeast
250230	Bom Sucesso	PB	4994	0	0	0	0	0	0	0	0	Northeast
250240	Bonito de Santa Fé	PB	11809	13	0	15.727	0	0	0	0	0	Northeast
250250	Boqueirão	PB	17738	28	0	22.55	0	11	0	8.859	0	Northeast
250260	Igaracy	PB	6130	121	0	281.986	0	0	0	0	0	Northeast
250270	Borborema	PB	5238	17	0	46.364	0	7	0	19.091	0	Northeast
250280	Brejo do Cruz	PB	14037	12	1	12.213	10.177	0	0	0	0	Northeast
250290	Brejo dos Santos	PB	6433	1	0	2.221	0	4	0	8.883	0	Northeast
250300	Caaporã	PB	21698	321	1	211.343	6.584	0	0	0	0	Northeast
250310	Cabaceiras	PB	5560	33	0	84.789	0	20	0	51.387	0	Northeast
250320	Cabedelo	PB	66680	245	0	52.49	0	40	0	8.57	0	Northeast
250330	Cachoeira dos Índios	PB	10182	24	0	33.673	0	13	0	18.239	0	Northeast
250340	Cacimba de Areia	PB	3667	0	0	0	0	0	0	0	0	Northeast
250350	Cacimba de Dentro	PB	17193	8	0	6.647	0	1	0	0.831	0	Northeast
250355	Cacimbas	PB	7145	0	0	0	0	0	0	0	0	Northeast
250360	Caiçara	PB	7210	1	0	1.981	0	0	0	0	0	Northeast
250370	Cajazeiras	PB	61690	73	0	16.905	0	7	0	1.621	0	Northeast
250375	Cajazeirinhas	PB	3181	0	0	0	0	5	0	22.455	0	Northeast
250380	Caldas Brandão	PB	5982	4	0	9.552	0	0	0	0	0	Northeast
250390	Camalaú	PB	5994	5	0	11.917	0	3	0	7.15	0	Northeast
250400	Campina Grande	PB	407607	416	5	14.58	1.752	180	1	6.309	0.35	Northeast
250403	Capim	PB	6424	2	0	4.448	0	1	0	2.224	0	Northeast
250407	Caraúbas	PB	4140	2	0	6.901	0	0	0	0	0	Northeast
250410	Carrapateira	PB	2631	0	0	0	0	0	0	0	0	Northeast
250415	Casserengue	PB	7435	2	0	3.843	0	0	0	0	0	Northeast
250420	Catingueira	PB	4929	2	0	5.797	0	0	0	0	0	Northeast
250430	Catolé do Rocha	PB	30405	217	0	101.957	0	230	0	108.065	0	Northeast
250435	Caturité	PB	4828	75	0	221.92	0	39	0	115.398	0	Northeast
250440	Conceição	PB	18957	3	0	2.261	0	0	0	0	0	Northeast
250450	Condado	PB	6649	1	0	2.149	0	0	0	0	0	Northeast
250460	Conde	PB	24323	101	1	59.321	5.873	28	0	16.445	0	Northeast
250470	Congo	PB	4785	0	0	0	0	0	0	0	0	Northeast
250480	Coremas	PB	15448	19	0	17.57	0	5	0	4.624	0	Northeast
250485	Coxixola	PB	1907	1	0	7.491	0	0	0	0	0	Northeast
250490	Cruz do Espírito Santo	PB	17173	6	0	4.991	0	0	0	0	0	Northeast
250500	Cubati	PB	7763	9	0	16.562	0	5	0	9.201	0	Northeast
250510	Cuité	PB	20343	110	0	77.247	0	47	0	33.005	0	Northeast
250520	Cuitegi	PB	6830	0	0	0	0	0	0	0	0	Northeast
250523	Cuité de Mamanguape	PB	6349	1	0	2.25	0	0	0	0	0	Northeast
250527	Curral de Cima	PB	5237	5	0	13.639	0	4	0	10.911	0	Northeast
250530	Curral Velho	PB	2521	0	0	0	0	0	0	0	0	Northeast
250535	Damião	PB	5289	0	0	0	0	0	0	0	0	Northeast
250540	Desterro	PB	8279	0	0	0	0	1	0	1.726	0	Northeast
250550	Vista Serrana	PB	3772	23	0	87.108	0	14	0	53.022	0	Northeast
250560	Diamante	PB	6575	0	0	0	0	0	0	0	0	Northeast
250570	Dona Inês	PB	10495	5	0	6.806	0	1	0	1.361	0	Northeast
250580	Duas Estradas	PB	3610	0	0	0	0	0	0	0	0	Northeast
250590	Emas	PB	3505	0	0	0	0	0	0	0	0	Northeast
250600	Esperança	PB	32811	211	1	91.868	4.354	61	0	26.559	0	Northeast
250610	Fagundes	PB	11291	13	1	16.448	12.652	2	0	2.53	0	Northeast
250620	Frei Martinho	PB	2990	4	0	19.111	0	0	0	0	0	Northeast
250625	Gado Bravo	PB	8329	0	0	0	0	0	0	0	0	Northeast
250630	Guarabira	PB	58545	708	0	172.761	0	9	0	2.196	0	Northeast
250640	Gurinhém	PB	14131	61	0	61.668	0	0	0	0	0	Northeast
250650	Gurjão	PB	3403	0	0	0	0	2	0	8.396	0	Northeast
250660	Ibiara	PB	5956	1	1	2.399	23.985	1	0	2.399	0	Northeast
250670	Imaculada	PB	11790	1	0	1.212	0	0	0	0	0	Northeast
250680	Ingá	PB	18060	2	0	1.582	0	4	0	3.164	0	Northeast
250690	Itabaiana	PB	24537	23	0	13.391	0	0	0	0	0	Northeast
250700	Itaporanga	PB	24553	3	0	1.745	0	0	0	0	0	Northeast
250710	Itapororoca	PB	18501	1118	0	863.274	0	25	0	19.304	0	Northeast
250720	Itatuba	PB	10906	3	0	3.93	0	1	0	1.31	0	Northeast
250730	Jacaraú	PB	14413	1	0	0.991	0	1	0	0.991	0	Northeast
250740	Jericó	PB	7732	15	0	27.714	0	0	0	0	0	Northeast
250750	João Pessoa	PB	800323	9310	23	166.183	4.105	606	5	10.817	0.892	Northeast
250760	Juarez Távora	PB	7896	33	0	59.705	0	3	0	5.428	0	Northeast
250770	Juazeirinho	PB	18041	27	1	21.38	7.918	10	0	7.918	0	Northeast
250780	Junco do Seridó	PB	7104	0	0	0	0	2	1	4.022	20.109	Northeast
250790	Juripiranga	PB	10717	3	0	3.999	0	2	0	2.666	0	Northeast
250800	Juru	PB	9886	7	0	10.115	0	0	0	0	0	Northeast
250810	Lagoa	PB	4679	3	0	9.159	0	0	0	0	0	Northeast
250820	Lagoa de Dentro	PB	7702	2	0	3.71	0	0	0	0	0	Northeast
250830	Lagoa Seca	PB	27385	32	0	16.693	0	3	0	1.565	0	Northeast
250840	Lastro	PB	2758	11	0	56.977	0	0	0	0	0	Northeast
250850	Livramento	PB	7248	3	0	5.913	0	1	0	1.971	0	Northeast
250855	Logradouro	PB	4294	8	0	26.615	0	0	0	0	0	Northeast
250860	Lucena	PB	12944	12	0	13.244	0	0	0	0	0	Northeast
250870	Mãe d'Água	PB	4020	1	0	3.554	0	0	0	0	0	Northeast
250880	Malta	PB	5766	1	1	2.478	24.776	1	0	2.478	0	Northeast
250890	Mamanguape	PB	44621	710	0	227.311	0	42	0	13.447	0	Northeast
250900	Manaíra	PB	10939	30	0	39.178	0	0	0	0	0	Northeast
250905	Marcação	PB	8460	9	0	15.198	0	2	0	3.377	0	Northeast
250910	Mari	PB	21808	61	0	39.959	0	0	0	0	0	Northeast
250915	Marizópolis	PB	6580	121	0	262.701	0	0	0	0	0	Northeast
250920	Massaranduba	PB	13837	129	0	133.183	0	1	0	1.032	0	Northeast
250930	Mataraca	PB	8327	2	0	3.431	0	0	0	0	0	Northeast
250933	Matinhas	PB	4484	0	0	0	0	0	0	0	0	Northeast
250937	Mato Grosso	PB	2889	0	0	0	0	0	0	0	0	Northeast
250939	Maturéia	PB	6506	1	0	2.196	0	0	0	0	0	Northeast
250940	Mogeiro	PB	13308	45	0	48.306	0	0	0	0	0	Northeast
250950	Montadas	PB	5598	7	0	17.864	0	0	0	0	0	Northeast
250960	Monte Horebe	PB	4789	1	0	2.983	0	0	0	0	0	Northeast
250970	Monteiro	PB	33007	388	2	167.93	8.656	104	0	45.012	0	Northeast
250980	Mulungu	PB	9871	5	0	7.236	0	0	0	0	0	Northeast
250990	Natuba	PB	10458	8	0	10.928	0	5	0	6.83	0	Northeast
251000	Nazarezinho	PB	7317	0	0	0	0	0	0	0	0	Northeast
251010	Nova Floresta	PB	10651	66	0	88.523	0	9	0	12.071	0	Northeast
251020	Nova Olinda	PB	5978	0	0	0	0	0	0	0	0	Northeast
251030	Nova Palmeira	PB	4852	12	0	35.332	0	3	0	8.833	0	Northeast
251040	Olho d'Água	PB	6592	0	0	0	0	0	0	0	0	Northeast
251050	Olivedos	PB	3902	16	0	58.578	0	16	0	58.578	0	Northeast
251060	Ouro Velho	PB	3033	10	0	47.101	0	0	0	0	0	Northeast
251065	Parari	PB	1786	0	0	0	0	0	0	0	0	Northeast
251070	Passagem	PB	2402	0	0	0	0	0	0	0	0	Northeast
251080	Patos	PB	107003	136	0	18.157	0	13	0	1.736	0	Northeast
251090	Paulista	PB	12314	4	0	4.64	0	0	0	0	0	Northeast
251100	Pedra Branca	PB	3800	0	0	0	0	0	0	0	0	Northeast
251110	Pedra Lavrada	PB	7785	45	0	82.576	0	6	0	11.01	0	Northeast
251120	Pedras de Fogo	PB	28382	5	1	2.517	5.033	1	0	0.503	0	Northeast
251130	Piancó	PB	16038	5	1	4.454	8.907	0	0	0	0	Northeast
251140	Picuí	PB	18686	297	0	227.061	0	2	0	1.529	0	Northeast
251150	Pilar	PB	11855	103	0	124.119	0	9	0	10.845	0	Northeast
251160	Pilões	PB	6696	0	0	0	0	0	0	0	0	Northeast
251170	Pilõezinhos	PB	4997	0	0	0	0	0	0	0	0	Northeast
251180	Pirpirituba	PB	10573	153	0	206.726	0	0	0	0	0	Northeast
251190	Pitimbu	PB	18851	46	0	34.86	0	2	0	1.516	0	Northeast
251200	Pocinhos	PB	18417	3	0	2.327	0	3	0	2.327	0	Northeast
251203	Poço Dantas	PB	3894	0	0	0	0	0	0	0	0	Northeast
251207	Poço de José de Moura	PB	4276	2	0	6.682	0	0	0	0	0	Northeast
251210	Pombal	PB	32800	6	1	2.613	4.355	8	0	3.484	0	Northeast
251220	Prata	PB	4180	16	0	54.682	0	9	0	30.759	0	Northeast
251230	Princesa Isabel	PB	23135	256	0	158.078	0	1	0	0.617	0	Northeast
251240	Puxinanã	PB	13617	3	0	3.147	0	2	0	2.098	0	Northeast
251250	Queimadas	PB	43748	826	1	269.727	3.265	458	1	149.558	3.265	Northeast
251260	Quixaba	PB	1929	2	0	14.812	0	4	0	29.623	0	Northeast
251270	Remígio	PB	19437	220	0	161.695	0	60	0	44.099	0	Northeast
251272	Pedro Régis	PB	6064	12	0	28.27	0	0	0	0	0	Northeast
251274	Riachão	PB	3555	1	0	4.018	0	0	0	0	0	Northeast
251275	Riachão do Bacamarte	PB	4500	14	1	44.444	31.746	1	0	3.175	0	Northeast
251276	Riachão do Poço	PB	4477	2	0	6.382	0	1	0	3.191	0	Northeast
251278	Riacho de Santo Antônio	PB	1922	9	0	66.895	0	3	0	22.298	0	Northeast
251280	Riacho dos Cavalos	PB	8511	0	0	0	0	1	0	1.679	0	Northeast
251290	Rio Tinto	PB	24134	35	0	20.718	0	4	0	2.368	0	Northeast
251300	Salgadinho	PB	3839	0	0	0	0	0	0	0	0	Northeast
251310	Salgado de São Félix	PB	12149	8	0	9.407	0	0	0	0	0	Northeast
251315	Santa Cecília	PB	6574	19	1	41.288	21.731	8	0	17.385	0	Northeast
251320	Santa Cruz	PB	6585	0	0	0	0	0	0	0	0	Northeast
251330	Santa Helena	PB	5907	22	0	53.206	0	0	0	0	0	Northeast
251335	Santa Inês	PB	3597	0	0	0	0	0	0	0	0	Northeast
251340	Santa Luzia	PB	15336	1	0	0.932	0	0	0	0	0	Northeast
251350	Santana de Mangueira	PB	5195	1	0	2.75	0	0	0	0	0	Northeast
251360	Santana dos Garrotes	PB	7077	0	0	0	0	0	0	0	0	Northeast
251365	Joca Claudino	PB	2633	10	0	54.256	0	9	0	48.831	0	Northeast
251370	Santa Rita	PB	135807	568	0	59.749	0	36	0	3.787	0	Northeast
251380	Santa Teresinha	PB	4585	3	0	9.347	0	0	0	0	0	Northeast
251385	Santo André	PB	2532	1	0	5.642	0	0	0	0	0	Northeast
251390	São Bento	PB	33710	123	0	52.125	0	43	0	18.223	0	Northeast
251392	São Bentinho	PB	4492	0	0	0	0	1	0	3.18	0	Northeast
251394	São Domingos do Cariri	PB	2601	0	0	0	0	0	0	0	0	Northeast
251396	São Domingos	PB	3049	0	0	0	0	0	0	0	0	Northeast
251398	São Francisco	PB	3400	0	0	0	0	0	0	0	0	Northeast
251400	São João do Cariri	PB	4213	41	0	139.025	0	11	0	37.3	0	Northeast
251410	São João do Tigre	PB	4430	6	0	19.349	0	2	0	6.45	0	Northeast
251420	São José da Lagoa Tapada	PB	7635	219	0	409.767	0	0	0	0	0	Northeast
251430	São José de Caiana	PB	6341	0	0	0	0	0	0	0	0	Northeast
251440	São José de Espinharas	PB	4708	3	0	9.103	0	0	0	0	0	Northeast
251445	São José dos Ramos	PB	5915	13	0	31.397	0	2	0	4.83	0	Northeast
251450	São José de Piranhas	PB	20170	0	0	0	0	0	0	0	0	Northeast
251455	São José de Princesa	PB	4057	8	0	28.17	0	0	0	0	0	Northeast
251460	São José do Bonfim	PB	3526	0	0	0	0	0	0	0	0	Northeast
251465	São José do Brejo do Cruz	PB	1791	0	0	0	0	0	0	0	0	Northeast
251470	São José do Sabugi	PB	4134	0	0	0	0	0	0	0	0	Northeast
251480	São José dos Cordeiros	PB	3639	0	0	0	0	1	0	3.926	0	Northeast
251490	São Mamede	PB	7745	22	0	40.579	0	1	0	1.845	0	Northeast
251500	São Miguel de Taipu	PB	7324	21	0	40.961	0	0	0	0	0	Northeast
251510	São Sebastião de Lagoa de Roça	PB	11595	39	0	48.05	0	22	0	27.105	0	Northeast
251520	São Sebastião do Umbuzeiro	PB	3466	57	1	234.935	41.217	11	0	45.338	0	Northeast
251530	Sapé	PB	52443	56	0	15.255	0	3	0	0.817	0	Northeast
251540	São Vicente do Seridó	PB	10700	10	0	13.351	0	5	0	6.676	0	Northeast
251550	Serra Branca	PB	13644	0	0	0	0	2	0	2.094	0	Northeast
251560	Serra da Raiz	PB	3166	10	0	45.122	0	0	0	0	0	Northeast
251570	Serra Grande	PB	2901	0	0	0	0	0	0	0	0	Northeast
251580	Serra Redonda	PB	7061	2	0	4.046	0	0	0	0	0	Northeast
251590	Serraria	PB	6131	3	0	6.99	0	0	0	0	0	Northeast
251593	Sertãozinho	PB	4958	94	0	270.847	0	6	0	17.288	0	Northeast
251597	Sobrado	PB	7751	1	0	1.843	0	1	0	1.843	0	Northeast
251600	Solânea	PB	26592	7	0	3.761	0	1	0	0.537	0	Northeast
251610	Soledade	PB	14875	8	2	7.683	19.208	1	0	0.96	0	Northeast
251615	Sossêgo	PB	3516	3	0	12.189	0	1	0	4.063	0	Northeast
251620	Sousa	PB	69158	675	1	139.432	2.066	71	0	14.666	0	Northeast
251630	Sumé	PB	16898	16	0	13.527	0	1	0	0.845	0	Northeast
251640	Tacima	PB	10852	11	0	14.481	0	0	0	0	0	Northeast
251650	Taperoá	PB	15308	7	1	6.533	9.332	2	0	1.866	0	Northeast
251660	Tavares	PB	14694	1	0	0.972	0	0	0	0	0	Northeast
251670	Teixeira	PB	15072	0	0	0	0	0	0	0	0	Northeast
251675	Tenório	PB	3035	0	0	0	0	0	0	0	0	Northeast
251680	Triunfo	PB	9446	203	0	307.008	0	0	0	0	0	Northeast
251690	Uiraúna	PB	15183	448	0	421.524	0	1	0	0.941	0	Northeast
251700	Umbuzeiro	PB	9902	13	0	18.755	0	9	0	12.984	0	Northeast
251710	Várzea	PB	2779	32	0	164.499	0	1	0	5.141	0	Northeast
251720	Vieirópolis	PB	5323	0	0	0	0	0	0	0	0	Northeast
251740	Zabelê	PB	2225	32	0	205.457	0	2	0	12.841	0	Northeast
260005	Abreu e Lima	PE	99618	308	0	44.169	0	1	0	0.143	0	Northeast
260010	Afogados da Ingazeira	PE	37111	21	2	8.084	7.699	0	0	0	0	Northeast
260020	Afrânio	PE	19456	0	0	0	0	2	0	1.469	0	Northeast
260030	Agrestina	PE	24702	9	0	5.205	0	1	0	0.578	0	Northeast
260040	Água Preta	PE	36454	31	0	12.148	0	1	0	0.392	0	Northeast
260050	Águas Belas	PE	43195	215	0	71.106	0	0	0	0	0	Northeast
260060	Alagoinha	PE	14554	13	0	12.76	0	0	0	0	0	Northeast
260070	Aliança	PE	38375	70	0	26.059	0	0	0	0	0	Northeast
260080	Altinho	PE	22959	564	0	350.936	0	0	0	0	0	Northeast
260090	Amaraji	PE	22788	562	0	352.316	0	4	0	2.508	0	Northeast
260100	Angelim	PE	11072	2	0	2.581	0	0	0	0	0	Northeast
260105	Araçoiaba	PE	20312	31	0	21.803	0	0	0	0	0	Northeast
260110	Araripina	PE	83964	564	0	95.959	0	2	0	0.34	0	Northeast
260120	Arcoverde	PE	73844	59	2	11.414	3.869	1	0	0.193	0	Northeast
260130	Barra de Guabiraba	PE	14257	2	0	2.004	0	0	0	0	0	Northeast
260140	Barreiros	PE	42552	233	1	78.224	3.357	1	0	0.336	0	Northeast
260150	Belém de Maria	PE	12023	1	0	1.188	0	0	0	0	0	Northeast
260160	Belém do São Francisco	PE	20728	2	0	1.378	0	3	0	2.068	0	Northeast
260170	Belo Jardim	PE	76185	31	0	5.813	0	0	0	0	0	Northeast
260180	Betânia	PE	12671	46	0	51.862	0	0	0	0	0	Northeast
260190	Bezerros	PE	60714	131	0	30.824	0	2	0	0.471	0	Northeast
260200	Bodocó	PE	37909	15	0	5.653	0	0	0	0	0	Northeast
260210	Bom Conselho	PE	48336	135	1	39.899	2.956	0	0	0	0	Northeast
260220	Bom Jardim	PE	39868	150	0	53.749	0	0	0	0	0	Northeast
260230	Bonito	PE	38152	58	0	21.718	0	0	0	0	0	Northeast
260240	Brejão	PE	8999	0	0	0	0	0	0	0	0	Northeast
260250	Brejinho	PE	7486	12	0	22.9	0	0	0	0	0	Northeast
260260	Brejo da Madre de Deus	PE	50249	13	0	3.696	0	0	0	0	0	Northeast
260270	Buenos Aires	PE	13119	28	0	30.49	0	0	0	0	0	Northeast
260280	Buíque	PE	57825	16	0	3.953	0	2	0	0.494	0	Northeast
260290	Cabo de Santo Agostinho	PE	205112	1790	2	124.671	1.393	17	0	1.184	0	Northeast
260300	Cabrobó	PE	33934	39	0	16.418	0	1	0	0.421	0	Northeast
260310	Cachoeirinha	PE	20258	111	1	78.276	7.052	1	0	0.705	0	Northeast
260320	Caetés	PE	28570	267	1	133.507	5	2	0	1	0	Northeast
260330	Calçado	PE	11089	216	0	278.268	0	0	0	0	0	Northeast
260340	Calumbi	PE	5753	16	0	39.731	0	1	0	2.483	0	Northeast
260345	Camaragibe	PE	156736	1335	5	121.679	4.557	6	0	0.547	0	Northeast
260350	Camocim de São Félix	PE	18627	155	0	118.875	0	0	0	0	0	Northeast
260360	Camutanga	PE	8530	51	0	85.413	0	1	0	1.675	0	Northeast
260370	Canhotinho	PE	24835	55	0	31.637	0	1	0	0.575	0	Northeast
260380	Capoeiras	PE	20048	2	0	1.425	0	0	0	0	0	Northeast
260390	Carnaíba	PE	19491	1018	1	746.132	7.329	0	0	0	0	Northeast
260392	Carnaubeira da Penha	PE	12836	47	0	52.308	0	1	0	1.113	0	Northeast
260400	Carpina	PE	82872	484	1	83.433	1.724	3	0	0.517	0	Northeast
260410	Caruaru	PE	356872	791	3	31.664	1.201	8	0	0.32	0	Northeast
260415	Casinhas	PE	14313	26	0	25.95	0	0	0	0	0	Northeast
260420	Catende	PE	42434	20	0	6.733	0	0	0	0	0	Northeast
260430	Cedro	PE	11722	18	0	21.937	0	0	0	0	0	Northeast
260440	Chã de Alegria	PE	13378	22	0	23.493	0	0	0	0	0	Northeast
260450	Chã Grande	PE	21579	0	0	0	0	0	0	0	0	Northeast
260460	Condado	PE	26249	12	0	6.531	0	0	0	0	0	Northeast
260470	Correntes	PE	18144	0	0	0	0	0	0	0	0	Northeast
260480	Cortês	PE	12596	18	0	20.415	0	1	0	1.134	0	Northeast
260490	Cumaru	PE	11635	26	0	31.923	0	0	0	0	0	Northeast
260500	Cupira	PE	24041	53	0	31.494	0	1	0	0.594	0	Northeast
260510	Custódia	PE	36841	91	0	35.287	0	5	0	1.939	0	Northeast
260515	Dormentes	PE	18734	1	0	0.763	0	0	0	0	0	Northeast
260520	Escada	PE	68448	306	0	63.865	0	1	0	0.209	0	Northeast
260530	Exu	PE	31885	220	0	98.569	0	2	0	0.896	0	Northeast
260540	Feira Nova	PE	22013	16	0	10.383	0	0	0	0	0	Northeast
260545	Fernando de Noronha	PE	3021	178	0	841.727	0	0	0	0	0	Northeast
260550	Ferreiros	PE	12075	71	0	83.999	0	0	0	0	0	Northeast
260560	Flores	PE	22631	1	0	0.631	0	0	0	0	0	Northeast
260570	Floresta	PE	32556	407	1	178.593	4.388	1	0	0.439	0	Northeast
260580	Frei Miguelinho	PE	15366	7	0	6.508	0	0	0	0	0	Northeast
260590	Gameleira	PE	30780	34	0	15.78	0	0	0	0	0	Northeast
260600	Garanhuns	PE	138983	1074	1	110.394	1.028	2	0	0.206	0	Northeast
260610	Glória do Goitá	PE	30554	18	0	8.416	0	1	0	0.468	0	Northeast
260620	Goiana	PE	79455	2363	0	424.859	0	2	0	0.36	0	Northeast
260630	Granito	PE	7435	14	0	26.9	0	0	0	0	0	Northeast
260640	Gravatá	PE	83437	882	0	151.012	0	4	0	0.685	0	Northeast
260650	Iati	PE	19152	627	0	467.687	0	0	0	0	0	Northeast
260660	Ibimirim	PE	29055	140	0	68.835	0	3	0	1.475	0	Northeast
260670	Ibirajuba	PE	7756	2	0	3.684	0	0	0	0	0	Northeast
260680	Igarassu	PE	115640	222	0	27.425	0	0	0	0	0	Northeast
260690	Iguaracy	PE	12209	90	0	105.309	0	0	0	0	0	Northeast
260700	Inajá	PE	22840	6	0	3.753	0	0	0	0	0	Northeast
260710	Ingazeira	PE	4554	18	0	56.465	0	0	0	0	0	Northeast
260720	Ipojuca	PE	94709	431	0	65.011	0	49	0	7.391	0	Northeast
260730	Ipubi	PE	30512	10	0	4.682	0	0	0	0	0	Northeast
260740	Itacuruba	PE	4869	6	0	17.604	0	14	0	41.076	0	Northeast
260750	Itaíba	PE	26390	121	0	65.501	0	0	0	0	0	Northeast
260760	Ilha de Itamaracá	PE	25836	295	0	163.117	0	0	0	0	0	Northeast
260765	Itambé	PE	36422	2050	0	804.067	0	4	0	1.569	0	Northeast
260770	Itapetim	PE	13680	14	0	14.62	0	0	0	0	0	Northeast
260775	Itapissuma	PE	26397	13	2	7.035	10.824	2	0	1.082	0	Northeast
260780	Itaquitinga	PE	16903	452	0	382.012	0	0	0	0	0	Northeast
260790	Jaboatão dos Guararapes	PE	697636	499	3	10.218	0.614	18	0	0.369	0	Northeast
260795	Jaqueira	PE	11668	2	0	2.449	0	0	0	0	0	Northeast
260800	Jataúba	PE	17070	18	0	15.064	0	1	0	0.837	0	Northeast
260805	Jatobá	PE	14740	24	0	23.26	0	0	0	0	0	Northeast
260810	João Alfredo	PE	32827	113	4	49.176	17.407	0	0	0	0	Northeast
260820	Joaquim Nabuco	PE	16036	14	0	12.472	0	1	0	0.891	0	Northeast
260825	Jucati	PE	11361	5	0	6.287	0	0	0	0	0	Northeast
260830	Jupi	PE	14747	2	0	1.937	0	0	0	0	0	Northeast
260840	Jurema	PE	15323	16	0	14.917	0	0	0	0	0	Northeast
260845	Lagoa do Carro	PE	17886	26	0	20.766	0	0	0	0	0	Northeast
260850	Lagoa de Itaenga	PE	21397	30	2	20.03	13.353	0	0	0	0	Northeast
260860	Lagoa do Ouro	PE	13065	12	0	13.121	0	0	0	0	0	Northeast
260870	Lagoa dos Gatos	PE	16262	3	0	2.635	0	0	0	0	0	Northeast
260875	Lagoa Grande	PE	25349	14	0	7.89	0	1	0	0.564	0	Northeast
260880	Lajedo	PE	39982	39	0	13.935	0	0	0	0	0	Northeast
260890	Limoeiro	PE	56302	146	1	37.045	2.537	3	0	0.761	0	Northeast
260900	Macaparana	PE	25278	261	0	147.503	0	0	0	0	0	Northeast
260910	Machados	PE	15851	12	0	10.815	0	1	0	0.901	0	Northeast
260915	Manari	PE	21085	37	0	25.069	0	0	0	0	0	Northeast
260920	Maraial	PE	11473	2	0	2.49	0	1	0	1.245	0	Northeast
260930	Mirandiba	PE	15308	73	0	68.125	0	1	0	0.933	0	Northeast
260940	Moreno	PE	62263	140	0	32.122	0	0	0	0	0	Northeast
260950	Nazaré da Mata	PE	32366	15	1	6.621	4.414	0	0	0	0	Northeast
260960	Olinda	PE	391835	2071	6	75.506	2.188	8	0	0.292	0	Northeast
260970	Orobó	PE	23833	63	0	37.763	0	0	0	0	0	Northeast
260980	Orocó	PE	14827	2	0	1.927	0	0	0	0	0	Northeast
260990	Ouricuri	PE	68939	53	0	10.983	0	0	0	0	0	Northeast
261000	Palmares	PE	62994	112	0	25.399	0	0	0	0	0	Northeast
261010	Palmeirina	PE	7789	0	0	0	0	0	0	0	0	Northeast
261020	Panelas	PE	26492	170	0	91.672	0	11	0	5.932	0	Northeast
261030	Paranatama	PE	11478	18	0	22.403	0	2	0	2.489	0	Northeast
261040	Parnamirim	PE	21914	14	0	9.127	0	1	0	0.652	0	Northeast
261050	Passira	PE	28972	164	1	80.866	4.931	0	0	0	0	Northeast
261060	Paudalho	PE	56078	264	0	67.253	0	6	0	1.528	0	Northeast
261070	Paulista	PE	329117	735	6	31.904	2.604	5	0	0.217	0	Northeast
261080	Pedra	PE	22566	38	0	24.056	0	0	0	0	0	Northeast
261090	Pesqueira	PE	67047	2116	2	450.856	4.261	2	0	0.426	0	Northeast
261100	Petrolândia	PE	36187	9	0	3.553	0	1	0	0.395	0	Northeast
261110	Petrolina	PE	343865	197	0	8.184	0	22	0	0.914	0	Northeast
261120	Poção	PE	11299	10	0	12.643	0	0	0	0	0	Northeast
261130	Pombos	PE	27033	18	1	9.512	5.285	2	0	1.057	0	Northeast
261140	Primavera	PE	14831	14	0	13.485	0	2	0	1.926	0	Northeast
261150	Quipapá	PE	25896	98	0	54.062	0	0	0	0	0	Northeast
261153	Quixaba	PE	6822	1	0	2.094	0	0	0	0	0	Northeast
261160	Recife	PE	1637834	27274	70	237.893	6.106	177	1	1.544	0.087	Northeast
261170	Riacho das Almas	PE	20443	0	0	0	0	0	0	0	0	Northeast
261180	Ribeirão	PE	47209	15	0	4.539	0	0	0	0	0	Northeast
261190	Rio Formoso	PE	23440	182	0	110.922	0	2	0	1.219	0	Northeast
261200	Sairé	PE	10103	2	0	2.828	0	0	0	0	0	Northeast
261210	Salgadinho	PE	10768	6	0	7.96	0	0	0	0	0	Northeast
261220	Salgueiro	PE	60604	58	0	13.672	0	1	0	0.236	0	Northeast
261230	Saloá	PE	15823	3	0	2.709	0	0	0	0	0	Northeast
261240	Sanharó	PE	26026	291	0	159.73	0	4	0	2.196	0	Northeast
261245	Santa Cruz	PE	15236	7	0	6.563	0	0	0	0	0	Northeast
261247	Santa Cruz da Baixa Verde	PE	12531	32	0	36.481	0	0	0	0	0	Northeast
261250	Santa Cruz do Capibaribe	PE	105936	200	2	26.97	2.697	1	0	0.135	0	Northeast
261255	Santa Filomena	PE	14390	4	0	3.971	0	0	0	0	0	Northeast
261260	Santa Maria da Boa Vista	PE	41759	1	0	0.342	0	0	0	0	0	Northeast
261270	Santa Maria do Cambucá	PE	14048	24	0	24.406	0	0	0	0	0	Northeast
261280	Santa Terezinha	PE	11764	23	0	27.93	0	2	0	2.429	0	Northeast
261290	São Benedito do Sul	PE	15717	7	0	6.363	0	0	0	0	0	Northeast
261300	São Bento do Una	PE	58956	1109	0	268.723	0	0	0	0	0	Northeast
261310	São Caitano	PE	37119	21	1	8.082	3.849	0	0	0	0	Northeast
261320	São João	PE	22686	131	0	82.493	0	0	0	0	0	Northeast
261330	São Joaquim do Monte	PE	21314	107	0	71.717	0	1	0	0.67	0	Northeast
261340	São José da Coroa Grande	PE	21004	165	0	112.224	0	0	0	0	0	Northeast
261350	São José do Belmonte	PE	33895	30	0	12.644	0	0	0	0	0	Northeast
261360	São José do Egito	PE	33735	8	0	3.388	0	1	0	0.423	0	Northeast
261370	São Lourenço da Mata	PE	112362	117	0	14.875	0	8	0	1.017	0	Northeast
261380	São Vicente Férrer	PE	17950	78	0	62.077	0	1	0	0.796	0	Northeast
261390	Serra Talhada	PE	85774	94	0	15.656	0	2	0	0.333	0	Northeast
261400	Serrita	PE	19133	17	0	12.693	0	0	0	0	0	Northeast
261410	Sertânia	PE	35761	27	0	10.786	0	2	0	0.799	0	Northeast
261420	Sirinhaém	PE	45359	72	0	22.676	0	1	0	0.315	0	Northeast
261430	Moreilândia	PE	11270	25	0	31.69	0	0	0	0	0	Northeast
261440	Solidão	PE	5993	1	0	2.384	0	0	0	0	0	Northeast
261450	Surubim	PE	64520	31	0	6.864	0	0	0	0	0	Northeast
261460	Tabira	PE	28381	2	0	1.007	0	0	0	0	0	Northeast
261470	Tacaimbó	PE	12890	0	0	0	0	0	0	0	0	Northeast
261480	Tacaratu	PE	25417	775	1	435.591	5.621	0	0	0	0	Northeast
261485	Tamandaré	PE	23149	83	0	51.221	0	0	0	0	0	Northeast
261500	Taquaritinga do North	PE	28416	2	0	1.005	0	0	0	0	0	Northeast
261510	Terezinha	PE	7139	20	0	40.022	0	0	0	0	0	Northeast
261520	Terra Nova	PE	9983	3	0	4.293	0	1	0	1.431	0	Northeast
261530	Timbaúba	PE	53246	386	1	103.562	2.683	8	0	2.146	0	Northeast
261540	Toritama	PE	44254	6	0	1.937	0	1	0	0.323	0	Northeast
261550	Tracunhaém	PE	13724	205	0	213.391	0	0	0	0	0	Northeast
261560	Trindade	PE	30222	3	0	1.418	0	2	0	0.945	0	Northeast
261570	Triunfo	PE	15265	160	0	149.736	0	0	0	0	0	Northeast
261580	Tupanatinga	PE	27052	31	0	16.371	0	1	0	0.528	0	Northeast
261590	Tuparetama	PE	8236	1	0	1.735	0	0	0	0	0	Northeast
261600	Venturosa	PE	18298	4	1	3.123	7.807	0	0	0	0	Northeast
261610	Verdejante	PE	9514	4	0	6.006	0	0	0	0	0	Northeast
261618	Vertente do Lério	PE	7666	3	0	5.591	0	0	0	0	0	Northeast
261620	Vertentes	PE	20503	56	0	39.019	0	0	0	0	0	Northeast
261630	Vicência	PE	32513	55	0	24.166	0	2	0	0.879	0	Northeast
261640	Vitória de Santo Antão	PE	137915	328	2	33.975	2.072	3	0	0.311	0	Northeast
261650	Xexéu	PE	14691	364	0	353.958	0	1	0	0.972	0	Northeast
270010	Água Branca	AL	20162	15	0	10.628	0	12	0	8.503	0	Northeast
270020	Anadia	AL	17564	27	0	21.961	0	4	0	3.253	0	Northeast
270030	Arapiraca	AL	230417	1311	1	81.281	0.62	110	0	6.82	0	Northeast
270040	Atalaia	AL	47000	42	0	12.766	0	41	0	12.462	0	Northeast
270050	Barra de Santo Antônio	AL	15792	18	0	16.283	0	8	1	7.237	9.046	Northeast
270060	Barra de São Miguel	AL	8264	170	0	293.874	0	19	0	32.845	0	Northeast
270070	Batalha	AL	18122	3	0	2.365	0	0	0	0	0	Northeast
270080	Belém	AL	4406	23	0	74.574	0	0	0	0	0	Northeast
270090	Belo Monte	AL	6696	29	0	61.871	0	0	0	0	0	Northeast
270100	Boca da Mata	AL	27206	222	0	116.571	0	5	0	2.625	0	Northeast
270110	Branquinha	AL	10529	11	0	14.925	0	5	0	6.784	0	Northeast
270120	Cacimbinhas	AL	10826	38	0	50.144	0	3	0	3.959	0	Northeast
270130	Cajueiro	AL	21194	20	0	13.481	0	14	0	9.437	0	Northeast
270135	Campestre	AL	6918	20	0	41.3	0	42	0	86.73	0	Northeast
270140	Campo Alegre	AL	56579	90	1	22.724	2.525	9	0	2.272	0	Northeast
270150	Campo Grande	AL	9549	5	0	7.48	0	2	0	2.992	0	Northeast
270160	Canapi	AL	17726	75	0	60.444	0	0	0	0	0	Northeast
270170	Capela	AL	17128	4	0	3.336	0	10	0	8.341	0	Northeast
270180	Carneiros	AL	9329	6	0	9.188	0	0	0	0	0	Northeast
270190	Chã Preta	AL	7311	2	0	3.908	0	0	0	0	0	Northeast
270200	Coité do Nóia	AL	10744	15	0	19.945	0	4	0	5.319	0	Northeast
270210	Colônia Leopoldina	AL	21575	148	0	97.997	0	104	0	68.863	0	Northeast
270220	Coqueiro Seco	AL	5826	104	0	255.014	0	2	0	4.904	0	Northeast
270230	Coruripe	AL	56562	150	0	37.885	0	69	0	17.427	0	Northeast
270235	Craíbas	AL	24129	218	0	129.068	0	1	0	0.592	0	Northeast
270240	Delmiro Gouveia	AL	51763	121	0	33.394	0	47	0	12.971	0	Northeast
270250	Dois Riachos	AL	11083	54	0	69.605	0	0	0	0	0	Northeast
270255	Estrela de Alagoas	AL	18153	123	0	96.796	0	3	0	2.361	0	Northeast
270260	Feira Grande	AL	22152	302	0	194.758	0	88	0	56.751	0	Northeast
270270	Feliz Deserto	AL	4729	0	0	0	0	0	0	0	0	Northeast
270280	Flexeiras	AL	12773	8	0	8.947	0	6	0	6.711	0	Northeast
270290	Girau do Ponciano	AL	40588	169	0	59.483	0	6	0	2.112	0	Northeast
270300	Ibateguara	AL	15606	0	0	0	0	0	0	0	0	Northeast
270310	Igaci	AL	25649	172	0	95.799	0	3	0	1.671	0	Northeast
270320	Igreja Nova	AL	24408	32	0	18.729	0	1	0	0.585	0	Northeast
270330	Inhapi	AL	18378	83	0	64.518	0	11	0	8.551	0	Northeast
270340	Jacaré dos Homens	AL	5288	1	0	2.702	0	0	0	0	0	Northeast
270350	Jacuípe	AL	7036	6	0	12.182	0	2	0	4.061	0	Northeast
270360	Japaratinga	AL	8317	4	0	6.871	0	2	0	3.435	0	Northeast
270370	Jaramataia	AL	5780	9	0	22.244	0	0	0	0	0	Northeast
270375	Jequiá da Praia	AL	11624	26	0	31.954	0	17	0	20.893	0	Northeast
270380	Joaquim Gomes	AL	23903	7	0	4.184	0	20	0	11.953	0	Northeast
270390	Jundiá	AL	4175	1	0	3.422	0	2	0	6.843	0	Northeast
270400	Junqueiro	AL	24731	219	0	126.504	0	25	0	14.441	0	Northeast
270410	Lagoa da Canoa	AL	17934	289	0	230.209	0	45	0	35.846	0	Northeast
270420	Limoeiro de Anadia	AL	28495	150	0	75.201	0	18	0	9.024	0	Northeast
270430	Maceió	AL	1012382	6306	11	88.984	1.552	2151	1	30.353	0.141	Northeast
270440	Major Isidoro	AL	19743	47	0	34.008	0	1	0	0.724	0	Northeast
270450	Maragogi	AL	32369	109	0	48.106	0	39	0	17.212	0	Northeast
270460	Maravilha	AL	9326	2	1	3.064	15.318	0	0	0	0	Northeast
270470	Marechal Deodoro	AL	51410	114	0	31.678	0	25	1	6.947	2.779	Northeast
270480	Maribondo	AL	13337	19	0	20.352	0	18	0	19.28	0	Northeast
270490	Mar Vermelho	AL	3534	0	0	0	0	0	0	0	0	Northeast
270500	Mata Grande	AL	25226	177	0	100.237	0	13	0	7.362	0	Northeast
270510	Matriz de Camaragibe	AL	24649	9	0	5.216	0	50	0	28.978	0	Northeast
270520	Messias	AL	17676	49	0	39.602	0	55	0	44.451	0	Northeast
270530	Minador do Negrão	AL	5337	25	0	66.918	0	4	0	10.707	0	Northeast
270540	Monteirópolis	AL	7153	0	0	0	0	2	0	3.994	0	Northeast
270550	Murici	AL	28137	37	0	18.786	0	30	0	15.232	0	Northeast
270560	Novo Lino	AL	12615	17	0	19.251	0	12	0	13.589	0	Northeast
270570	Olho d'Água das Flores	AL	21545	10	0	6.631	0	0	0	0	0	Northeast
270580	Olho d'Água do Casado	AL	9303	0	0	0	0	1	0	1.536	0	Northeast
270590	Olho d'Água Grande	AL	5117	8	0	22.335	0	3	0	8.375	0	Northeast
270600	Olivença	AL	11584	0	0	0	0	2	0	2.466	0	Northeast
270610	Ouro Branco	AL	11456	1	0	1.247	0	1	0	1.247	0	Northeast
270620	Palestina	AL	4985	6	0	17.194	0	1	0	2.866	0	Northeast
270630	Palmeira dos Índios	AL	73096	889	0	173.744	0	48	0	9.381	0	Northeast
270640	Pão de Açúcar	AL	24446	9	0	5.259	0	2	0	1.169	0	Northeast
270642	Pariconha	AL	10527	53	0	71.924	0	0	0	0	0	Northeast
270644	Paripueira	AL	13016	107	0	117.438	0	47	0	51.585	0	Northeast
270650	Passo de Camaragibe	AL	15232	1	0	0.938	0	1	0	0.938	0	Northeast
270660	Paulo Jacinto	AL	7568	1	0	1.888	0	1	0	1.888	0	Northeast
270670	Penedo	AL	63516	113	0	25.415	0	35	0	7.872	0	Northeast
270680	Piaçabuçu	AL	17805	136	0	109.119	0	16	0	12.837	0	Northeast
270690	Pilar	AL	35008	207	0	84.47	0	6	0	2.448	0	Northeast
270700	Pindoba	AL	2911	3	0	14.722	0	22	0	107.965	0	Northeast
270710	Piranhas	AL	24891	3	0	1.722	0	1	0	0.574	0	Northeast
270720	Poço das Trincheiras	AL	14354	68	0	67.677	0	2	0	1.99	0	Northeast
270730	Porto Calvo	AL	27079	0	0	0	0	3	0	1.583	0	Northeast
270740	Porto de Pedras	AL	7873	0	0	0	0	0	0	0	0	Northeast
270750	Porto Real do Colégio	AL	20018	24	0	17.127	0	0	0	0	0	Northeast
270760	Quebrangulo	AL	11342	2	0	2.519	0	8	0	10.076	0	Northeast
270770	Rio Largo	AL	74838	1708	0	326.038	0	1014	0	193.561	0	Northeast
270780	Roteiro	AL	6680	59	0	126.176	0	2	0	4.277	0	Northeast
270790	Santa Luzia do North	AL	7272	18	0	35.361	0	5	0	9.822	0	Northeast
270800	Santana do Ipanema	AL	47418	231	0	69.594	0	25	0	7.532	0	Northeast
270810	Santana do Mundaú	AL	10793	1	0	1.324	0	1	0	1.324	0	Northeast
270820	São Brás	AL	6953	2	0	4.109	0	0	0	0	0	Northeast
270830	São José da Laje	AL	23855	30	0	17.966	0	33	0	19.762	0	Northeast
270840	São José da Tapera	AL	32027	126	2	56.203	8.921	214	0	95.455	0	Northeast
270850	São Luís do Quitunde	AL	34415	16	0	6.642	0	37	0	15.359	0	Northeast
270860	São Miguel dos Campos	AL	60691	117	0	27.54	0	57	0	13.417	0	Northeast
270870	São Miguel dos Milagres	AL	7888	1	0	1.811	0	0	0	0	0	Northeast
270880	São Sebastião	AL	34011	33	0	13.861	0	17	0	7.141	0	Northeast
270890	Satuba	AL	13716	63	0	65.617	0	42	0	43.745	0	Northeast
270895	Senador Rui Palmeira	AL	13742	106	0	110.194	0	7	0	7.277	0	Northeast
270900	Tanque d'Arca	AL	6187	36	0	83.124	0	2	0	4.618	0	Northeast
270910	Taquarana	AL	19886	36	0	25.862	0	0	0	0	0	Northeast
270915	Teotônio Vilela	AL	43960	24	0	7.799	0	44	0	14.299	0	Northeast
270920	Traipu	AL	27603	45	0	23.289	0	2	0	1.035	0	Northeast
270930	União dos Palmares	AL	65427	119	0	25.983	0	15	0	3.275	0	Northeast
270940	Viçosa	AL	25773	11	0	6.097	0	60	0	33.257	0	Northeast
280010	Amparo do São Francisco	SE	2368	0	0	0	0	0	0	0	0	Northeast
280020	Aquidabã	SE	21443	57	0	37.974	0	6	0	3.997	0	Northeast
280030	Aracaju	SE	648939	4568	3	100.56	0.66	203	0	4.469	0	Northeast
280040	Arauá	SE	10168	92	0	129.257	0	15	0	21.075	0	Northeast
280050	Areia Branca	SE	18396	19	0	14.755	0	1	0	0.777	0	Northeast
280060	Barra dos Coqueiros	SE	29873	280	0	133.9	0	13	0	6.217	0	Northeast
280067	Boquim	SE	26731	204	0	109.023	0	5	0	2.672	0	Northeast
280070	Brejo Grande	SE	8264	0	0	0	0	0	0	0	0	Northeast
280100	Campo do Brito	SE	17997	16	0	12.701	0	0	0	0	0	Northeast
280110	Canhoba	SE	4011	12	0	42.74	0	0	0	0	0	Northeast
280120	Canindé de São Francisco	SE	29384	15	0	7.293	0	5	0	2.431	0	Northeast
280130	Capela	SE	33904	18	0	7.584	0	0	0	0	0	Northeast
280140	Carira	SE	21922	14	0	9.123	0	0	0	0	0	Northeast
280150	Carmópolis	SE	16324	196	0	171.527	0	0	0	0	0	Northeast
280160	Cedro de São João	SE	5880	73	0	177.357	0	17	0	41.302	0	Northeast
280170	Cristinápolis	SE	17714	17	0	13.71	0	5	0	4.032	0	Northeast
280190	Cumbe	SE	3977	17	0	61.065	0	5	0	17.96	0	Northeast
280200	Divina Pastora	SE	5059	13	0	36.71	0	0	0	0	0	Northeast
280210	Estância	SE	68804	702	0	145.756	0	14	0	2.907	0	Northeast
280220	Feira Nova	SE	5567	1	0	2.566	0	0	0	0	0	Northeast
280230	Frei Paulo	SE	15283	27	0	25.238	0	4	0	3.739	0	Northeast
280240	Gararu	SE	11606	25	0	30.772	0	0	0	0	0	Northeast
280250	General Maynard	SE	3307	17	0	73.437	0	0	0	0	0	Northeast
280260	Gracho Cardoso	SE	5811	7	0	17.209	0	0	0	0	0	Northeast
280270	Ilha das Flores	SE	8519	0	0	0	0	0	0	0	0	Northeast
280280	Indiaroba	SE	17761	44	0	35.391	0	0	0	0	0	Northeast
280290	Itabaiana	SE	94696	562	1	84.783	1.509	14	0	2.112	0	Northeast
280300	Itabaianinha	SE	41684	536	0	183.695	0	37	0	12.68	0	Northeast
280310	Itabi	SE	4921	0	0	0	0	0	0	0	0	Northeast
280320	Itaporanga d'Ajuda	SE	33994	45	0	18.911	0	1	0	0.42	0	Northeast
280330	Japaratuba	SE	18576	34	0	26.147	0	1	0	0.769	0	Northeast
280340	Japoatã	SE	13440	8	0	8.503	0	0	0	0	0	Northeast
280350	Lagarto	SE	103576	278	1	38.343	1.379	32	0	4.414	0	Northeast
280360	Laranjeiras	SE	29567	44	0	21.259	0	0	0	0	0	Northeast
280370	Macambira	SE	6877	33	0	68.551	0	0	0	0	0	Northeast
280380	Malhada dos Bois	SE	3665	90	0	350.809	0	5	0	19.489	0	Northeast
280390	Malhador	SE	12581	260	0	295.23	0	1	0	1.135	0	Northeast
280400	Maruim	SE	17153	7	0	5.83	0	0	0	0	0	Northeast
280410	Moita Bonita	SE	11322	53	0	66.874	0	1	0	1.262	0	Northeast
280420	Monte Alegre de Sergipe	SE	14885	31	1	29.752	9.597	5	0	4.799	0	Northeast
280430	Muribeca	SE	7610	42	0	78.844	0	0	0	0	0	Northeast
280440	Neópolis	SE	18735	133	0	101.414	0	13	0	9.913	0	Northeast
280445	Nossa Senhora Aparecida	SE	8783	5	0	8.133	0	0	0	0	0	Northeast
280450	Nossa Senhora da Glória	SE	36514	26	0	10.172	0	0	0	0	0	Northeast
280460	Nossa Senhora das Dores	SE	26460	1150	0	620.883	0	20	0	10.798	0	Northeast
280470	Nossa Senhora de Lourdes	SE	6470	1	0	2.208	0	0	0	0	0	Northeast
280480	Nossa Senhora do Socorro	SE	181503	1495	1	117.668	0.787	65	0	5.116	0	Northeast
280490	Pacatuba	SE	14312	7	0	6.987	0	0	0	0	0	Northeast
280500	Pedra Mole	SE	3236	8	0	35.317	0	0	0	0	0	Northeast
280510	Pedrinhas	SE	9538	1	0	1.498	0	0	0	0	0	Northeast
280520	Pinhão	SE	6523	23	1	50.371	21.901	8	0	17.52	0	Northeast
280530	Pirambu	SE	9199	1	0	1.553	0	0	0	0	0	Northeast
280540	Poço Redondo	SE	34420	17	0	7.056	0	3	0	1.245	0	Northeast
280550	Poço Verde	SE	23586	1	0	0.606	0	0	0	0	0	Northeast
280560	Porto da Folha	SE	28497	293	0	146.883	0	7	0	3.509	0	Northeast
280570	Propriá	SE	29559	25	0	12.082	0	0	0	0	0	Northeast
280580	Riachão do Dantas	SE	19800	100	0	72.15	0	0	0	0	0	Northeast
280590	Riachuelo	SE	10140	2	0	2.818	0	0	0	0	0	Northeast
280600	Ribeirópolis	SE	18528	82	0	63.225	0	0	0	0	0	Northeast
280610	Rosário do Catete	SE	10697	7	0	9.348	0	1	0	1.335	0	Northeast
280620	Salgado	SE	19970	14	0	10.015	0	0	0	0	0	Northeast
280630	Santa Luzia do Itanhy	SE	13947	2	0	2.049	0	0	0	0	0	Northeast
280640	Santana do São Francisco	SE	7714	2	0	3.704	0	0	0	0	0	Northeast
280650	Santa Rosa de Lima	SE	3904	17	0	62.207	0	0	0	0	0	Northeast
280660	Santo Amaro das Brotas	SE	12051	19	0	22.523	0	0	0	0	0	Northeast
280670	São Cristóvão	SE	89027	3877	0	622.123	0	47	0	7.542	0	Northeast
280680	São Domingos	SE	11065	11	0	14.202	0	1	0	1.291	0	Northeast
280690	São Francisco	SE	3667	4	0	15.583	0	0	0	0	0	Northeast
280700	São Miguel do Aleixo	SE	3913	1	0	3.651	0	1	0	3.651	0	Northeast
280710	Simão Dias	SE	40359	327	0	115.747	0	23	0	8.141	0	Northeast
280720	Siriri	SE	8813	18	0	29.178	0	0	0	0	0	Northeast
280730	Telha	SE	3204	4	0	17.835	0	0	0	0	0	Northeast
280740	Tobias Barreto	SE	51843	31	0	8.542	0	1	0	0.276	0	Northeast
280750	Tomar do Geru	SE	13537	2	0	2.111	0	0	0	0	0	Northeast
280760	Umbaúba	SE	25033	81	0	46.225	0	13	0	7.419	0	Northeast
290010	Abaíra	BA	8767	0	0	0	0	0	0	0	0	Northeast
290020	Abaré	BA	19814	2	0	1.442	0	2	0	1.442	0	Northeast
290030	Acajutiba	BA	15129	6	0	5.666	0	0	0	0	0	Northeast
290035	Adustina	BA	16949	4	0	3.371	0	0	0	0	0	Northeast
290040	Água Fria	BA	16901	7	0	5.917	0	0	0	0	0	Northeast
290050	Érico Cardoso	BA	10662	0	0	0	0	5	0	6.699	0	Northeast
290060	Aiquara	BA	4478	5	0	15.951	0	3	0	9.571	0	Northeast
290070	Alagoinhas	BA	150832	123	0	11.65	0	41	0	3.883	0	Northeast
290080	Alcobaça	BA	22449	45	0	28.636	0	0	0	0	0	Northeast
290090	Almadina	BA	5566	0	0	0	0	1	0	2.567	0	Northeast
290100	Amargosa	BA	37031	92	0	35.491	0	5	0	1.929	0	Northeast
290110	Amélia Rodrigues	BA	25159	44	0	24.984	0	0	0	0	0	Northeast
290115	América Dourada	BA	16097	22	0	19.524	0	8	0	7.1	0	Northeast
290120	Anagé	BA	22420	1	0	0.637	0	0	0	0	0	Northeast
290130	Andaraí	BA	13153	98	0	106.44	0	0	0	0	0	Northeast
290135	Andorinha	BA	14690	0	0	0	0	1	0	0.972	0	Northeast
290140	Angical	BA	14017	0	0	0	0	0	0	0	0	Northeast
290150	Anguera	BA	11142	39	0	50.004	0	7	0	8.975	0	Northeast
290160	Antas	BA	19093	230	0	172.09	0	18	0	13.468	0	Northeast
290170	Antônio Cardoso	BA	11691	19	0	23.217	0	0	0	0	0	Northeast
290180	Antônio Gonçalves	BA	11715	60	0	73.166	0	1	0	1.219	0	Northeast
290190	Aporá	BA	17673	1	0	0.808	0	0	0	0	0	Northeast
290195	Apuarema	BA	7360	0	0	0	0	2	0	3.882	0	Northeast
290200	Aracatu	BA	13229	0	0	0	0	1	0	1.08	0	Northeast
290205	Araçás	BA	12143	0	0	0	0	0	0	0	0	Northeast
290210	Araci	BA	54099	79	0	20.861	0	1	0	0.264	0	Northeast
290220	Aramari	BA	11332	0	0	0	0	0	0	0	0	Northeast
290225	Arataca	BA	11079	0	0	0	0	1	0	1.289	0	Northeast
290230	Aratuípe	BA	8813	0	0	0	0	0	0	0	0	Northeast
290240	Aurelino Leal	BA	11774	0	0	0	0	0	0	0	0	Northeast
290250	Baianópolis	BA	13824	1	0	1.033	0	0	0	0	0	Northeast
290260	Baixa Grande	BA	20488	75	1	52.295	6.973	0	0	0	0	Northeast
290265	Banzaê	BA	13217	18	0	19.455	0	0	0	0	0	Northeast
290270	Barra	BA	53231	24	0	6.441	0	0	0	0	0	Northeast
290280	Barra da Estiva	BA	20813	0	0	0	0	0	0	0	0	Northeast
290290	Barra do Choça	BA	32018	0	0	0	0	0	0	0	0	Northeast
290300	Barra do Mendes	BA	13222	6	0	6.483	0	3	0	3.241	0	Northeast
290310	Barra do Rocha	BA	5821	8	0	19.633	0	2	0	4.908	0	Northeast
290320	Barreiras	BA	153831	4202	0	390.224	0	305	0	28.324	0	Northeast
290323	Barro Alto	BA	14802	0	0	0	0	0	0	0	0	Northeast
290327	Barrocas	BA	15846	11	0	9.917	0	2	0	1.803	0	Northeast
290330	Barro Preto	BA	5743	158	0	393.025	0	90	0	223.875	0	Northeast
290340	Belmonte	BA	23214	48	0	29.539	0	65	0	40	0	Northeast
290350	Belo Campo	BA	17317	0	0	0	0	0	0	0	0	Northeast
290360	Biritinga	BA	15975	259	0	231.612	0	0	0	0	0	Northeast
290370	Boa Nova	BA	12953	7	0	7.72	0	16	0	17.646	0	Northeast
290380	Boa Vista do Tupim	BA	18622	8	0	6.137	0	0	0	0	0	Northeast
290390	Bom Jesus da Lapa	BA	68609	9	0	1.874	0	13	0	2.707	0	Northeast
290395	Bom Jesus da Serra	BA	9942	1	0	1.437	0	0	0	0	0	Northeast
290400	Boninal	BA	14288	1	0	1	0	0	0	0	0	Northeast
290405	Bonito	BA	16637	0	0	0	0	0	0	0	0	Northeast
290410	Boquira	BA	21520	32	0	21.243	0	5	0	3.319	0	Northeast
290420	Botuporã	BA	10300	5	0	6.935	0	3	0	4.161	0	Northeast
290430	Brejões	BA	14370	5	0	4.971	0	1	0	0.994	0	Northeast
290440	Brejolândia	BA	10493	0	0	0	0	0	0	0	0	Northeast
290450	Brotas de Macaúbas	BA	11019	62	0	80.381	0	2	0	2.593	0	Northeast
290460	Brumado	BA	67048	32	0	6.818	0	141	0	30.042	0	Northeast
290470	Buerarema	BA	18391	42	1	32.625	7.768	36	0	27.964	0	Northeast
290475	Buritirama	BA	21067	5	0	3.391	0	0	0	0	0	Northeast
290480	Caatiba	BA	7043	8	0	16.227	0	0	0	0	0	Northeast
290485	Cabaceiras do Paraguaçu	BA	18698	3	0	2.292	0	1	1	0.764	7.64	Northeast
290490	Cachoeira	BA	33369	11	0	4.709	0	5	0	2.141	0	Northeast
290500	Caculé	BA	23045	0	0	0	0	0	0	0	0	Northeast
290510	Caém	BA	9372	5	0	7.621	0	0	0	0	0	Northeast
290515	Caetanos	BA	14474	2	0	1.974	0	1	0	0.987	0	Northeast
290520	Caetité	BA	50861	9	0	2.528	0	1	0	0.281	0	Northeast
290530	Cafarnaum	BA	18356	14	0	10.896	0	9	0	7.004	0	Northeast
290540	Cairu	BA	17913	1	0	0.798	0	0	0	0	0	Northeast
290550	Caldeirão Grande	BA	13260	8	0	8.619	0	0	0	0	0	Northeast
290560	Camacan	BA	31968	74	0	33.069	0	130	0	58.094	0	Northeast
290570	Camaçari	BA	293723	1714	0	83.363	0	63	0	3.064	0	Northeast
290580	Camamu	BA	35248	4	0	1.621	0	0	0	0	0	Northeast
290590	Campo Alegre de Lourdes	BA	28777	5	0	2.482	0	2	0	0.993	0	Northeast
290600	Campo Formoso	BA	70912	99	0	19.944	0	33	0	6.648	0	Northeast
290610	Canápolis	BA	9719	0	0	0	0	0	0	0	0	Northeast
290620	Canarana	BA	26020	21	0	11.53	0	0	0	0	0	Northeast
290630	Canavieiras	BA	31301	53	0	24.189	0	2	0	0.913	0	Northeast
290640	Candeal	BA	8338	3	0	5.14	0	0	0	0	0	Northeast
290650	Candeias	BA	86677	2488	4	410.061	6.593	34	0	5.604	0	Northeast
290660	Candiba	BA	14268	1	0	1.001	0	0	0	0	0	Northeast
290670	Cândido Sales	BA	25332	9	0	5.075	0	25	0	14.098	0	Northeast
290680	Cansanção	BA	34784	1863	1	765.13	4.107	5	0	2.053	0	Northeast
290682	Canudos	BA	16582	0	0	0	0	0	0	0	0	Northeast
290685	Capela do Alto Alegre	BA	11660	83	0	101.691	0	0	0	0	0	Northeast
290687	Capim Grosso	BA	30451	161	0	75.531	0	65	0	30.494	0	Northeast
290689	Caraíbas	BA	9107	1	0	1.569	0	0	0	0	0	Northeast
290690	Caravelas	BA	21937	203	0	132.197	0	3	0	1.954	0	Northeast
290700	Cardeal da Silva	BA	9240	0	0	0	0	0	0	0	0	Northeast
290710	Carinhanha	BA	28965	3	0	1.48	0	0	0	0	0	Northeast
290720	Casa Nova	BA	71366	3	0	0.601	0	4	0	0.801	0	Northeast
290730	Castro Alves	BA	26209	1	0	0.545	0	2	0	1.09	0	Northeast
290740	Catolândia	BA	3555	2	0	8.037	0	0	0	0	0	Northeast
290750	Catu	BA	54424	378	0	99.221	0	34	0	8.925	0	Northeast
290755	Caturama	BA	9340	3	0	4.589	0	0	0	0	0	Northeast
290760	Central	BA	17252	9	0	7.453	0	3	0	2.484	0	Northeast
290770	Chorrochó	BA	11154	1	0	1.281	0	1	0	1.281	0	Northeast
290780	Cícero Dantas	BA	32450	11	1	4.843	4.402	2	0	0.88	0	Northeast
290790	Cipó	BA	17245	23	0	19.053	0	0	0	0	0	Northeast
290800	Coaraci	BA	17458	190	0	155.475	0	167	0	136.655	0	Northeast
290810	Cocos	BA	18746	1	0	0.762	0	1	0	0.762	0	Northeast
290820	Conceição da Feira	BA	22392	6	0	3.828	0	0	0	0	0	Northeast
290830	Conceição do Almeida	BA	17332	54	0	44.509	0	2	0	1.648	0	Northeast
290840	Conceição do Coité	BA	66191	677	0	146.114	0	1	0	0.216	0	Northeast
290850	Conceição do Jacuípe	BA	32897	4	0	1.737	0	4	0	1.737	0	Northeast
290860	Conde	BA	25630	7	0	3.902	0	1	0	0.557	0	Northeast
290870	Condeúba	BA	17319	4	0	3.299	0	1	0	0.825	0	Northeast
290880	Contendas do Sincorá	BA	4086	7	0	24.474	0	9	0	31.466	0	Northeast
290890	Coração de Maria	BA	22719	172	0	108.154	0	0	0	0	0	Northeast
290900	Cordeiros	BA	8585	0	0	0	0	0	0	0	0	Northeast
290910	Coribe	BA	14240	6	0	6.019	0	0	0	0	0	Northeast
290920	Coronel João Sá	BA	16079	36	0	31.985	0	4	0	3.554	0	Northeast
290930	Correntina	BA	32081	1	0	0.445	0	0	0	0	0	Northeast
290940	Cotegipe	BA	13796	315	0	326.182	0	11	0	11.39	0	Northeast
290950	Cravolândia	BA	5349	7	0	18.695	0	11	0	29.378	0	Northeast
290960	Crisópolis	BA	21040	3	0	2.037	0	1	0	0.679	0	Northeast
290970	Cristópolis	BA	13872	71	0	73.117	0	1	0	1.03	0	Northeast
290980	Cruz das Almas	BA	62871	439	0	99.751	0	12	0	2.727	0	Northeast
290990	Curaçá	BA	34503	6	0	2.484	0	5	0	2.07	0	Northeast
291000	Dário Meira	BA	10906	186	0	243.64	0	15	0	19.648	0	Northeast
291005	Dias d'Ávila	BA	79685	28	0	5.02	0	2	0	0.359	0	Northeast
291010	Dom Basílio	BA	12155	3	0	3.526	0	7	0	8.227	0	Northeast
291020	Dom Macedo Costa	BA	4050	0	0	0	0	0	0	0	0	Northeast
291030	Elísio Medrado	BA	8119	0	0	0	0	0	0	0	0	Northeast
291040	Encruzilhada	BA	17593	1	0	0.812	0	0	0	0	0	Northeast
291050	Entre Rios	BA	41654	315	0	108.033	0	2	0	0.686	0	Northeast
291060	Esplanada	BA	36882	36	0	13.944	0	3	0	1.162	0	Northeast
291070	Euclides da Cunha	BA	60300	9	0	2.132	0	0	0	0	0	Northeast
291072	Eunápolis	BA	112318	2185	0	277.91	0	474	0	60.288	0	Northeast
291075	Fátima	BA	17937	19	0	15.132	0	0	0	0	0	Northeast
291077	Feira da Mata	BA	5668	0	0	0	0	0	0	0	0	Northeast
291080	Feira de Santana	BA	609913	8823	3	206.657	0.703	129	0	3.022	0	Northeast
291085	Filadélfia	BA	16410	358	0	311.657	0	15	0	13.058	0	Northeast
291090	Firmino Alves	BA	5604	9	0	22.943	0	52	0	132.558	0	Northeast
291100	Floresta Azul	BA	10686	236	0	315.5	0	5	0	6.684	0	Northeast
291110	Formosa do Rio Preto	BA	25311	4	0	2.258	0	1	0	0.564	0	Northeast
291120	Gandu	BA	32202	13	0	5.767	0	3	0	1.331	0	Northeast
291125	Gavião	BA	4487	3	0	9.551	0	4	0	12.735	0	Northeast
291130	Gentio do Ouro	BA	11206	75	0	95.612	0	0	0	0	0	Northeast
291140	Glória	BA	15208	23	0	21.605	0	1	0	0.939	0	Northeast
291150	Gongogi	BA	7276	39	0	76.573	0	2	0	3.927	0	Northeast
291160	Governador Mangabeira	BA	20679	37	0	25.561	0	2	0	1.382	0	Northeast
291165	Guajeru	BA	7239	0	0	0	0	24	0	47.363	0	Northeast
291170	Guanambi	BA	84014	486	0	82.639	0	186	0	31.627	0	Northeast
291180	Guaratinga	BA	20991	5	0	3.403	0	2	0	1.361	0	Northeast
291185	Heliópolis	BA	13076	24	0	26.22	0	0	0	0	0	Northeast
291190	Iaçu	BA	24496	3	0	1.75	0	0	0	0	0	Northeast
291200	Ibiassucê	BA	9427	0	0	0	0	0	0	0	0	Northeast
291210	Ibicaraí	BA	22014	124	0	80.468	0	5	0	3.245	0	Northeast
291220	Ibicoara	BA	19346	8	0	5.907	0	9	0	6.646	0	Northeast
291230	Ibicuí	BA	16162	0	0	0	0	1	0	0.884	0	Northeast
291240	Ibipeba	BA	18097	13	0	10.262	0	0	0	0	0	Northeast
291250	Ibipitanga	BA	14856	239	0	229.825	0	44	0	42.311	0	Northeast
291260	Ibiquera	BA	4043	30	0	106.003	0	0	0	0	0	Northeast
291270	Ibirapitanga	BA	23343	7	0	4.284	0	2	0	1.224	0	Northeast
291280	Ibirapuã	BA	8581	180	0	299.665	0	0	0	0	0	Northeast
291290	Ibirataia	BA	15760	3	0	2.719	0	7	0	6.345	0	Northeast
291300	Ibitiara	BA	16272	27	0	23.704	0	19	0	16.681	0	Northeast
291310	Ibititá	BA	17150	4	0	3.332	0	0	0	0	0	Northeast
291320	Ibotirama	BA	26846	207	0	110.152	0	51	0	27.139	0	Northeast
291330	Ichu	BA	6194	33	0	76.111	0	0	0	0	0	Northeast
291340	Igaporã	BA	15630	3	0	2.742	0	1	0	0.914	0	Northeast
291345	Igrapiúna	BA	13367	2	0	2.137	0	2	0	2.137	0	Northeast
291350	Iguaí	BA	26868	4	0	2.127	0	3	0	1.595	0	Northeast
291360	Ilhéus	BA	164844	611	2	52.95	1.733	49	0	4.246	0	Northeast
291370	Inhambupe	BA	39499	79	0	28.572	0	60	1	21.7	3.617	Northeast
291380	Ipecaetá	BA	14625	154	0	150.427	0	4	0	3.907	0	Northeast
291390	Ipiaú	BA	45823	0	0	0	0	2	0	0.624	0	Northeast
291400	Ipirá	BA	59763	29	0	6.932	0	15	0	3.586	0	Northeast
291410	Ipupiara	BA	9817	53	0	77.126	0	7	0	10.186	0	Northeast
291420	Irajuba	BA	7243	91	0	179.484	0	9	0	17.751	0	Northeast
291430	Iramaia	BA	8893	0	0	0	0	0	0	0	0	Northeast
291440	Iraquara	BA	24942	21	0	12.028	0	1	0	0.573	0	Northeast
[truncated: 3,572 more rows]

## Sheet: Table S1b - chikunguya
ID_MN_RESI	FxEt	data	Sexo	Classification	n
110001	5to9	2018-06-11	M	autochthonous	1
110001	20to29	2017-05-01	M	opened	1
110002	0to4	2016-09-30	F	autochthonous	1
110002	0to4	2017-07-11	F	opened	1
110002	5to9	2020-04-04	F	autochthonous	1
110002	5to9	2020-04-05	F	autochthonous	1
110002	15to19	2018-01-19	M	autochthonous	1
110002	15to19	2018-05-03	F	opened	1
110002	15to19	2020-08-05	M	autochthonous	1
110002	15to19	2020-12-30	M	autochthonous	1
110002	20to29	2017-12-25	M	autochthonous	1
110002	20to29	2018-01-01	F	opened	1
110002	20to29	2019-11-25	M	opened	1
110002	30to39	2018-05-28	F	opened	1
110002	30to39	2020-06-01	F	autochthonous	1
110002	40to49	2017-03-20	F	opened	1
110002	40to49	2020-04-12	M	opened	1
110002	40to49	2020-09-19	M	autochthonous	1
110002	40to49	2021-01-01	F	autochthonous	1
110002	50to59	2020-02-21	M	autochthonous	1
110002	50to59	2020-05-26	M	autochthonous	1
110002	60to69	2016-04-11	F	autochthonous	1
110002	60to69	2020-04-06	M	autochthonous	1
110002	70to79	2017-06-20	M	autochthonous	1
110002	70to79	2020-08-15	F	autochthonous	1
110002	70to79	2020-09-13	F	autochthonous	1
110003	0to4	2019-08-05	M	autochthonous	1
110004	5to9	2016-07-06	M	autochthonous	1
110004	5to9	2017-03-26	M	autochthonous	1
110004	5to9	2018-03-09	F	autochthonous	1
110004	5to9	2018-06-20	F	autochthonous	1
110004	5to9	2018-07-04	M	autochthonous	1
110004	5to9	2019-02-05	M	autochthonous	1
110004	5to9	2019-02-19	M	autochthonous	1
110004	5to9	2019-03-30	M	autochthonous	1
110004	10to14	2018-03-16	F	autochthonous	1
110004	10to14	2018-09-08	M	autochthonous	1
110004	10to14	2019-02-18	M	autochthonous	1
110004	10to14	2019-02-27	F	autochthonous	1
110004	10to14	2021-05-09	F	autochthonous	1
110004	15to19	2017-04-14	F	autochthonous	1
110004	20to29	2017-08-15	F	autochthonous	1
110004	20to29	2018-05-23	F	autochthonous	1
110004	20to29	2019-02-22	F	autochthonous	1
110004	20to29	2019-04-22	M	autochthonous	1
110004	30to39	2015-12-26	F	autochthonous	1
110004	30to39	2016-02-20	F	autochthonous	1
110004	30to39	2018-01-29	M	autochthonous	1
110004	30to39	2018-09-14	F	autochthonous	1
110004	30to39	2019-02-22	M	autochthonous	1
110004	30to39	2020-06-18	F	autochthonous	1
110004	30to39	2021-05-10	F	autochthonous	1
110004	30to39	2021-07-27	F	autochthonous	1
110004	40to49	2016-03-02	M	autochthonous	1
110004	40to49	2016-03-05	F	autochthonous	1
110004	40to49	2016-05-07	M	autochthonous	1
110004	40to49	2019-02-15	F	autochthonous	1
110004	40to49	2020-03-01	F	autochthonous	1
110004	50to59	2017-07-14	M	opened	1
110004	50to59	2018-05-29	F	autochthonous	1
110005	0to4	2016-02-22	F	autochthonous	1
110005	5to9	2016-02-16	F	autochthonous	1
110005	10to14	2017-08-03	F	autochthonous	1
110005	30to39	2017-12-09	F	autochthonous	1
110005	30to39	2020-04-10	M	autochthonous	1
110005	40to49	2019-04-10	F	autochthonous	1
110005	40to49	2019-05-07	M	autochthonous	1
110005	40to49	2021-01-04	M	opened	1
110005	50to59	2016-02-21	M	autochthonous	1
110005	50to59	2018-05-02	F	opened	1
110005	50to59	2019-03-15	F	autochthonous	1
110005	50to59	2020-01-28	F	autochthonous	1
110005	50to59	2020-03-25	M	opened	1
110005	60to69	2016-02-05	F	autochthonous	1
110005	60to69	2020-01-15	M	opened	1
110005	60to69	2020-02-10	M	autochthonous	1
110006	5to9	2021-06-30	F	autochthonous	1
110006	10to14	2021-06-14	M	autochthonous	1
110006	20to29	2018-01-02	F	autochthonous	1
110006	20to29	2021-05-14	F	autochthonous	1
110006	20to29	2021-06-18	F	autochthonous	1
110006	30to39	2021-06-15	F	autochthonous	1
110006	30to39	2021-06-19	F	autochthonous	1
110006	40to49	2021-05-28	F	autochthonous	1
110006	40to49	2021-06-11	F	autochthonous	1
110006	40to49	2021-06-13	F	autochthonous	1
110006	40to49	2021-06-30	F	autochthonous	1
110006	40to49	2021-07-05	F	autochthonous	1
110006	50to59	2021-07-12	F	autochthonous	1
110006	50to59	2021-08-10	F	autochthonous	1
110007	50to59	2019-11-25	F	autochthonous	1
110010	0to4	2019-04-14	F	opened	1
110010	20to29	2019-05-12	F	opened	1
110010	30to39	2017-03-30	M	opened	1
110010	40to49	2018-07-23	F	opened	1
110011	5to9	2020-03-02	F	autochthonous	1
110011	20to29	2017-02-15	F	opened	1
110011	30to39	2018-04-06	F	opened	1
110011	40to49	2017-01-29	F	opened	1
110011	40to49	2017-02-03	F	opened	1
110011	40to49	2017-03-02	F	autochthonous	1
110011	40to49	2017-03-13	F	opened	2
110011	40to49	2017-03-21	M	opened	1
110011	50to59	2017-02-08	M	autochthonous	1
110012	5to9	2018-05-14	M	autochthonous	1
110012	5to9	2019-03-21	F	autochthonous	1
110012	10to14	2018-04-13	M	opened	1
110012	15to19	2017-10-23	M	autochthonous	1
110012	15to19	2021-06-07	M	autochthonous	1
110012	20to29	2017-12-05	F	opened	1
110012	20to29	2021-08-20	F	opened	1
110012	20to29	2021-10-20	F	opened	1
110012	30to39	2017-05-08	F	opened	1
110012	30to39	2018-01-13	F	autochthonous	1
110012	30to39	2018-02-09	M	opened	1
110012	30to39	2021-05-08	F	opened	1
110012	30to39	2021-05-17	M	opened	1
110012	30to39	2021-07-23	M	opened	1
110012	40to49	2017-08-04	F	autochthonous	1
110012	40to49	2018-01-21	F	opened	1
110012	40to49	2019-04-11	F	autochthonous	1
110012	40to49	2021-01-14	F	opened	1
110012	40to49	2021-05-23	F	autochthonous	1
110012	50to59	2017-05-22	F	autochthonous	1
110012	50to59	2017-06-18	F	autochthonous	1
110012	50to59	2017-08-01	F	opened	1
110012	50to59	2018-01-10	M	opened	1
110012	60to69	2017-01-26	M	opened	1
110012	60to69	2017-07-12	F	opened	1
110012	60to69	2018-01-11	F	opened	1
110012	60to69	2021-08-01	M	opened	1
110012	70to79	2021-01-16	M	opened	1
110015	0to4	2019-02-21	F	opened	1
110015	30to39	2018-01-16	F	autochthonous	1
110015	60to69	2017-11-25	F	autochthonous	1
110015	60to69	2020-06-10	M	autochthonous	1
110018	15to19	2016-01-10	F	autochthonous	1
110018	20to29	2016-02-07	F	autochthonous	1
110018	30to39	2019-03-17	M	opened	1
110020	0to4	2016-07-13	F	opened	1
110020	0to4	2016-07-27	M	opened	1
110020	0to4	2016-08-30	M	opened	1
110020	0to4	2016-09-18	M	autochthonous	1
110020	0to4	2016-09-19	F	autochthonous	1
110020	0to4	2016-09-23	F	autochthonous	1
110020	0to4	2016-10-17	M	autochthonous	1
110020	0to4	2016-10-18	F	opened	1
110020	0to4	2016-10-25	F	opened	1
110020	0to4	2016-11-11	F	autochthonous	1
110020	0to4	2016-12-22	M	autochthonous	1
110020	0to4	2017-02-14	F	autochthonous	1
110020	0to4	2017-03-31	F	autochthonous	1
110020	0to4	2017-05-16	F	autochthonous	1
110020	0to4	2017-06-07	M	autochthonous	1
110020	0to4	2017-09-05	F	autochthonous	1
110020	0to4	2017-10-02	F	autochthonous	1
110020	0to4	2018-07-11	M	autochthonous	1
110020	0to4	2018-08-15	M	autochthonous	1
110020	0to4	2019-03-17	M	autochthonous	1
110020	5to9	2016-02-26	F	autochthonous	1
110020	5to9	2017-01-11	M	autochthonous	1
110020	5to9	2017-02-03	F	opened	1
110020	5to9	2017-02-16	F	autochthonous	1
110020	5to9	2017-02-17	M	autochthonous	1
110020	5to9	2017-06-08	F	autochthonous	1
110020	5to9	2017-09-28	F	autochthonous	1
110020	5to9	2017-12-01	M	autochthonous	1
110020	10to14	2017-01-22	F	autochthonous	1
110020	10to14	2017-03-07	M	autochthonous	1
110020	10to14	2017-03-15	F	autochthonous	1
110020	10to14	2018-02-15	M	autochthonous	1
110020	10to14	2019-02-20	F	autochthonous	1
110020	10to14	2019-03-13	F	autochthonous	1
110020	10to14	2019-04-28	M	autochthonous	1
110020	10to14	2019-05-03	F	autochthonous	1
110020	10to14	2021-06-03	M	autochthonous	1
110020	15to19	2016-01-28	F	autochthonous	1
110020	15to19	2016-02-10	F	autochthonous	1
110020	15to19	2016-06-21	F	opened	1
110020	15to19	2017-01-23	F	autochthonous	1
110020	15to19	2017-07-02	M	autochthonous	1
110020	15to19	2017-07-09	F	autochthonous	1
110020	15to19	2017-12-16	F	autochthonous	1
110020	15to19	2019-03-09	M	autochthonous	1
110020	20to29	2016-01-15	F	autochthonous	1
110020	20to29	2016-02-01	F	autochthonous	1
110020	20to29	2016-02-02	F	opened	1
110020	20to29	2016-02-13	F	autochthonous	1
110020	20to29	2016-02-16	F	opened	1
110020	20to29	2016-05-26	F	opened	1
110020	20to29	2016-05-30	F	opened	1
110020	20to29	2016-06-16	F	opened	1
110020	20to29	2016-07-12	F	opened	1
110020	20to29	2016-08-03	F	opened	1
110020	20to29	2016-10-12	F	autochthonous	2
110020	20to29	2016-10-15	M	autochthonous	1
110020	20to29	2016-10-21	F	opened	1
110020	20to29	2016-12-19	M	autochthonous	1
110020	20to29	2016-12-31	F	autochthonous	1
110020	20to29	2017-01-04	F	autochthonous	2
110020	20to29	2017-01-09	M	autochthonous	1
110020	20to29	2017-01-15	F	autochthonous	1
110020	20to29	2017-01-16	M	autochthonous	1
110020	20to29	2017-02-05	M	autochthonous	1
110020	20to29	2017-02-14	F	autochthonous	1
110020	20to29	2017-02-19	F	autochthonous	1
110020	20to29	2017-08-12	F	autochthonous	1
110020	20to29	2017-10-02	F	autochthonous	1
110020	20to29	2017-10-16	F	autochthonous	1
110020	20to29	2018-03-04	F	autochthonous	1
110020	20to29	2018-07-31	M	autochthonous	1
110020	20to29	2019-03-04	M	autochthonous	1
110020	20to29	2019-03-13	M	autochthonous	1
110020	20to29	2019-03-14	F	autochthonous	1
110020	20to29	2019-03-30	M	autochthonous	1
110020	20to29	2019-04-01	M	autochthonous	1
110020	20to29	2019-05-03	F	autochthonous	1
110020	20to29	2019-07-14	M	autochthonous	1
110020	20to29	2019-12-02	F	autochthonous	1
110020	20to29	2020-02-03	F	autochthonous	1
110020	20to29	2020-02-14	F	autochthonous	1
110020	20to29	2021-05-05	F	autochthonous	1
110020	20to29	2021-09-17	F	autochthonous	1
110020	20to29	2021-11-14	M	autochthonous	1
110020	30to39	2016-02-17	F	opened	1
110020	30to39	2016-02-18	F	autochthonous	1
110020	30to39	2016-03-08	F	autochthonous	1
110020	30to39	2016-03-23	F	autochthonous	1
110020	30to39	2016-07-06	F	opened	1
110020	30to39	2016-12-12	F	autochthonous	1
110020	30to39	2016-12-22	M	autochthonous	2
110020	30to39	2016-12-23	F	autochthonous	1
110020	30to39	2017-01-03	F	autochthonous	1
110020	30to39	2017-01-17	F	autochthonous	1
110020	30to39	2017-01-23	F	autochthonous	1
110020	30to39	2017-01-24	F	autochthonous	1
110020	30to39	2017-02-06	F	autochthonous	1
110020	30to39	2017-02-15	M	autochthonous	1
110020	30to39	2017-02-18	F	autochthonous	1
110020	30to39	2017-03-07	F	autochthonous	2
110020	30to39	2017-03-10	F	autochthonous	1
110020	30to39	2017-03-17	M	autochthonous	1
110020	30to39	2017-03-21	F	autochthonous	1
110020	30to39	2017-05-21	M	autochthonous	1
110020	30to39	2017-09-17	F	autochthonous	1
110020	30to39	2017-10-10	F	opened	1
110020	30to39	2018-01-31	F	autochthonous	1
110020	30to39	2018-02-08	M	autochthonous	1
110020	30to39	2018-06-01	F	autochthonous	1
110020	30to39	2018-08-20	M	autochthonous	1
110020	30to39	2019-03-16	M	autochthonous	1
110020	30to39	2019-03-20	F	autochthonous	1
110020	30to39	2019-04-14	M	autochthonous	1
110020	30to39	2019-04-20	M	autochthonous	1
110020	30to39	2020-01-28	M	autochthonous	1
110020	30to39	2020-02-02	M	autochthonous	1
110020	30to39	2020-02-09	F	autochthonous	2
110020	30to39	2020-02-13	F	autochthonous	1
110020	30to39	2021-02-08	F	autochthonous	1
110020	30to39	2021-02-12	M	autochthonous	1
110020	30to39	2021-11-15	M	opened	1
110020	40to49	2015-12-05	F	autochthonous	1
110020	40to49	2016-02-01	F	autochthonous	3
110020	40to49	2016-02-13	F	autochthonous	1
110020	40to49	2016-02-22	F	autochthonous	1
110020	40to49	2016-09-21	F	autochthonous	1
110020	40to49	2016-12-10	F	opened	1
110020	40to49	2016-12-29	F	autochthonous	1
110020	40to49	2017-01-08	F	autochthonous	1
110020	40to49	2017-01-13	F	autochthonous	1
110020	40to49	2017-01-16	F	autochthonous	1
110020	40to49	2017-01-28	M	autochthonous	1
110020	40to49	2017-02-05	M	autochthonous	1
110020	40to49	2017-02-18	F	autochthonous	1
110020	40to49	2017-02-21	F	autochthonous	1
110020	40to49	2017-04-24	M	autochthonous	1
110020	40to49	2017-09-15	M	autochthonous	1
110020	40to49	2017-10-20	M	opened	1
110020	40to49	2018-02-05	F	autochthonous	1
110020	40to49	2018-03-05	F	autochthonous	1
110020	40to49	2018-04-16	F	autochthonous	1
110020	40to49	2018-10-28	F	autochthonous	1
110020	40to49	2019-05-05	M	autochthonous	1
110020	40to49	2020-01-03	M	opened	1
110020	40to49	2020-02-07	M	autochthonous	1
110020	40to49	2020-02-17	M	autochthonous	1
110020	50to59	2016-12-23	F	autochthonous	1
110020	50to59	2016-12-27	F	autochthonous	1
110020	50to59	2017-01-09	F	autochthonous	1
110020	50to59	2017-01-19	F	autochthonous	1
110020	50to59	2017-01-25	M	autochthonous	1
110020	50to59	2017-01-30	F	autochthonous	1
110020	50to59	2017-02-10	F	autochthonous	1
110020	50to59	2017-03-25	F	autochthonous	1
110020	50to59	2017-06-19	F	autochthonous	1
110020	50to59	2018-02-25	M	autochthonous	1
110020	50to59	2019-03-11	F	autochthonous	1
110020	50to59	2019-04-15	F	autochthonous	1
110020	50to59	2020-02-01	M	autochthonous	1
110020	50to59	2020-11-27	F	autochthonous	1
110020	50to59	2021-06-24	M	autochthonous	1
110020	50to59	2021-07-26	M	autochthonous	1
110020	60to69	2016-12-29	F	autochthonous	1
110020	60to69	2017-01-09	F	autochthonous	1
110020	60to69	2017-02-10	F	autochthonous	1
110020	60to69	2017-02-18	F	autochthonous	1
110020	60to69	2017-02-26	M	autochthonous	1
110020	60to69	2017-05-25	M	autochthonous	1
110020	60to69	2018-03-01	M	autochthonous	1
110020	60to69	2021-02-05	M	autochthonous	1
110020	60to69	2021-07-22	F	autochthonous	1
110020	70to79	2016-08-11	M	opened	1
110020	70to79	2021-06-02	F	autochthonous	1
110025	0to4	2016-09-16	F	opened	1
110025	0to4	2021-04-19	M	opened	1
110025	5to9	2019-03-13	M	opened	1
110025	5to9	2019-03-16	F	opened	1
110025	10to14	2019-02-26	F	autochthonous	1
110025	10to14	2019-03-19	F	opened	1
110025	15to19	2019-04-09	F	opened	1
110025	15to19	2020-02-10	M	opened	1
110025	15to19	2021-03-10	F	opened	1
110025	15to19	2021-03-17	F	opened	1
110025	15to19	2021-03-29	M	opened	1
110025	20to29	2017-08-20	F	autochthonous	1
110025	20to29	2021-03-17	M	opened	1
110025	20to29	2021-03-20	F	opened	1
110025	20to29	2021-04-19	M	opened	1
110025	30to39	2016-04-16	F	opened	1
110025	30to39	2017-09-18	F	autochthonous	1
110025	30to39	2021-03-18	M	opened	1
110025	30to39	2021-03-19	F	opened	1
110025	30to39	2021-10-04	M	opened	1
110025	40to49	2017-02-25	M	opened	1
110025	40to49	2017-08-27	F	opened	1
110025	40to49	2019-02-17	F	opened	1
110025	40to49	2019-03-16	F	opened	1
110025	40to49	2019-03-18	F	opened	1
110025	40to49	2020-02-14	M	autochthonous	1
110025	40to49	2021-03-05	F	opened	1
110025	40to49	2021-05-31	F	opened	1
110025	50to59	2019-04-19	F	opened	1
110025	50to59	2020-02-11	F	opened	1
110025	50to59	2021-03-18	M	opened	1
110025	50to59	2021-03-27	F	opened	1
110025	50to59	2021-05-10	F	opened	1
110025	50to59	2021-09-12	F	opened	1
110028	0to4	2016-02-20	F	autochthonous	1
110028	20to29	2019-03-21	F	opened	1
110029	20to29	2020-05-16	F	opened	1
110029	40to49	2020-03-06	F	autochthonous	1
110030	0to4	2019-10-25	M	autochthonous	1
110030	0to4	2021-07-07	M	autochthonous	1
110030	5to9	2020-04-28	M	opened	1
110030	5to9	2021-06-22	F	autochthonous	1
110030	10to14	2020-03-13	F	autochthonous	1
110030	15to19	2019-07-21	F	opened	1
110030	15to19	2020-05-04	F	autochthonous	1
110030	20to29	2019-05-05	F	opened	1
110030	20to29	2020-04-09	M	autochthonous	1
110030	20to29	2020-07-27	F	autochthonous	1
110030	20to29	2021-05-04	F	opened	1
110030	20to29	2021-05-15	F	autochthonous	1
110030	30to39	2019-03-18	M	autochthonous	1
110030	30to39	2019-10-24	F	autochthonous	1
110030	30to39	2020-12-12	M	opened	1
110030	30to39	2021-01-19	M	autochthonous	1
110030	30to39	2021-04-16	F	autochthonous	1
110030	40to49	2016-01-21	F	autochthonous	1
110030	40to49	2016-12-30	F	autochthonous	1
110030	40to49	2020-10-15	M	opened	1
110030	50to59	2017-01-16	F	autochthonous	1
110030	50to59	2020-01-15	M	opened	1
110030	50to59	2020-10-01	M	autochthonous	1
110030	60to69	2020-03-25	F	autochthonous	1
110030	60to69	2021-04-14	M	autochthonous	1
110030	70to79	2020-03-15	F	autochthonous	1
110030	>= 80	2017-11-28	M	autochthonous	1
110032	20to29	2019-01-09	F	autochthonous	1
110032	40to49	2019-03-07	F	autochthonous	1
110033	10to14	2020-02-12	F	autochthonous	1
110033	20to29	2020-01-18	F	autochthonous	1
110037	15to19	2017-12-16	M	autochthonous	1
110037	20to29	2018-01-15	M	autochthonous	1
110037	20to29	2020-01-28	F	autochthonous	1
110037	20to29	2021-01-08	M	autochthonous	1
110037	30to39	2020-02-15	F	autochthonous	1
110037	40to49	2016-12-12	M	autochthonous	1
110037	40to49	2018-01-23	M	opened	1
110037	40to49	2020-01-24	M	autochthonous	1
110037	50to59	2020-02-01	F	autochthonous	1
110037	70to79	2019-02-01	M	autochthonous	1
110040	50to59	2016-11-24	M	autochthonous	1
110080	0to4	2016-12-09	F	opened	1
110080	10to14	2021-08-21	M	opened	1
110080	20to29	2017-02-05	M	opened	1
110080	20to29	2017-07-04	F	opened	1
110080	20to29	2019-02-18	F	opened	1
110080	30to39	2018-03-12	M	autochthonous	1
110080	40to49	2019-02-03	M	opened	1
110092	5to9	2021-06-02	F	autochthonous	1
110094	0to4	2017-02-19	M	autochthonous	1
110100	50to59	2020-03-23	M	opened	1
110110	0to4	2016-09-19	M	opened	1
110110	30to39	2017-02-09	F	autochthonous	1
110110	50to59	2018-06-09	F	autochthonous	1
110120	10to14	2018-04-28	M	autochthonous	1
110140	15to19	2017-12-05	F	autochthonous	1
110143	10to14	2017-07-18	F	opened	1
110143	20to29	2017-02-14	F	opened	1
110143	30to39	2017-06-09	F	opened	1
110143	50to59	2017-02-14	M	opened	1
110145	10to14	2021-01-14	F	autochthonous	1
110145	10to14	2021-02-05	M	opened	1
110145	15to19	2021-02-01	F	autochthonous	1
110145	20to29	2021-01-24	F	autochthonous	1
110145	40to49	2021-01-28	F	opened	1
110145	40to49	2021-02-11	F	autochthonous	1
110146	0to4	2019-04-01	F	autochthonous	1
110146	5to9	2016-03-24	F	autochthonous	1
110146	5to9	2018-04-25	M	autochthonous	1
110146	5to9	2018-05-11	M	opened	1
110146	5to9	2018-05-26	M	opened	1
110146	5to9	2019-03-25	F	autochthonous	1
110146	5to9	2019-03-28	F	autochthonous	1
110146	15to19	2018-04-17	M	opened	1
110146	15to19	2018-05-08	M	autochthonous	1
110146	20to29	2018-05-31	F	opened	1
110146	30to39	2019-03-26	M	autochthonous	1
110146	30to39	2019-04-05	M	autochthonous	1
110146	40to49	2019-03-26	F	opened	1
110146	40to49	2019-05-08	M	autochthonous	1
110147	5to9	2019-02-15	M	opened	1
110147	10to14	2020-11-25	F	opened	1
110147	20to29	2019-02-20	F	autochthonous	1
110147	50to59	2020-11-26	M	autochthonous	1
110149	30to39	2021-04-14	M	autochthonous	1
110150	15to19	2016-10-05	F	autochthonous	1
110155	20to29	2018-04-06	F	autochthonous	1
110155	30to39	2018-04-06	M	autochthonous	1
110170	5to9	2017-08-12	M	autochthonous	1
110170	40to49	2017-07-12	F	opened	1
110170	50to59	2017-08-28	F	opened	1
110170	50to59	2018-02-03	F	autochthonous	1
110180	10to14	2021-06-04	M	Undetermined	1
110180	10to14	2021-06-12	M	Undetermined	1
120001	5to9	2016-09-09	F	opened	1
120005	0to4	2020-07-20	M	opened	1
120005	30to39	2016-02-02	M	autochthonous	1
120005	30to39	2018-09-06	M	autochthonous	1
120010	10to14	2016-12-24	F	autochthonous	1
120010	15to19	2017-02-08	F	autochthonous	1
120010	20to29	2017-01-28	F	autochthonous	2
120010	20to29	2017-09-25	F	autochthonous	1
120010	20to29	2018-03-08	F	autochthonous	1
120010	30to39	2017-01-09	F	autochthonous	1
120010	30to39	2017-01-22	F	autochthonous	1
120010	30to39	2017-03-07	F	autochthonous	1
120010	40to49	2016-12-07	M	autochthonous	1
120010	40to49	2017-02-05	M	autochthonous	1
120010	40to49	2018-03-10	F	autochthonous	1
120010	40to49	2018-07-06	F	autochthonous	1
120010	50to59	2016-12-17	M	autochthonous	1
120010	50to59	2017-01-02	F	autochthonous	1
120010	50to59	2017-01-09	M	autochthonous	1
120013	5to9	2017-07-05	M	opened	1
120013	20to29	2018-10-18	F	autochthonous	1
120013	30to39	2020-07-16	F	opened	1
120013	40to49	2021-02-16	F	opened	1
120017	10to14	2019-01-03	M	opened	1
120020	0to4	2017-12-05	F	autochthonous	1
120020	0to4	2018-10-16	F	autochthonous	1
120020	0to4	2021-02-08	M	opened	1
120020	0to4	2021-03-04	M	opened	1
120020	5to9	2017-06-16	M	autochthonous	1
120020	5to9	2018-04-25	F	autochthonous	1
120020	5to9	2020-12-22	M	autochthonous	1
120020	10to14	2017-06-05	F	autochthonous	1
120020	10to14	2017-06-12	F	autochthonous	1
120020	10to14	2017-10-13	F	opened	1
120020	10to14	2017-12-20	F	autochthonous	1
120020	10to14	2018-01-08	F	autochthonous	1
120020	10to14	2020-02-14	F	autochthonous	1
120020	10to14	2020-02-15	F	opened	1
120020	10to14	2021-01-18	F	autochthonous	1
120020	10to14	2021-03-02	M	opened	1
120020	15to19	2020-02-10	F	autochthonous	1
120020	15to19	2020-02-10	F	opened	1
120020	15to19	2021-01-11	M	opened	1
120020	15to19	2021-03-03	F	opened	1
120020	15to19	2021-06-07	M	opened	1
120020	15to19	2021-06-09	M	opened	1
120020	15to19	2021-10-14	F	autochthonous	1
120020	20to29	2017-05-08	F	autochthonous	1
120020	20to29	2017-06-14	M	autochthonous	1
120020	20to29	2017-10-08	M	opened	1
120020	20to29	2017-12-15	F	autochthonous	1
120020	20to29	2018-02-07	M	autochthonous	1
120020	20to29	2018-03-29	M	autochthonous	1
120020	20to29	2019-12-10	F	autochthonous	1
120020	20to29	2019-12-19	M	autochthonous	1
120020	20to29	2020-05-14	M	opened	1
120020	20to29	2021-01-01	F	opened	1
120020	20to29	2021-01-11	F	autochthonous	1
120020	20to29	2021-01-17	F	autochthonous	1
120020	20to29	2021-03-12	M	opened	1
120020	20to29	2021-05-14	F	autochthonous	1
120020	20to29	2021-10-05	F	opened	1
120020	20to29	2021-11-04	F	opened	1
120020	20to29	2021-11-15	F	opened	1
120020	30to39	2018-01-09	F	autochthonous	1
120020	30to39	2018-08-02	M	autochthonous	1
120020	30to39	2018-09-05	M	opened	1
120020	30to39	2018-09-23	F	opened	1
120020	30to39	2018-09-29	M	autochthonous	1
120020	30to39	2018-10-08	M	autochthonous	1
120020	30to39	2020-03-06	F	autochthonous	1
120020	30to39	2020-03-12	F	autochthonous	1
120020	30to39	2020-05-03	M	autochthonous	1
120020	30to39	2020-05-10	F	opened	1
120020	30to39	2020-12-14	M	opened	1
120020	30to39	2021-01-10	F	autochthonous	1
120020	30to39	2021-01-14	F	autochthonous	1
120020	30to39	2021-01-17	F	autochthonous	1
120020	30to39	2021-01-17	F	opened	1
120020	30to39	2021-02-19	F	opened	1
120020	30to39	2021-02-28	M	opened	1
120020	30to39	2021-03-02	F	opened	1
120020	30to39	2021-03-12	F	opened	1
120020	30to39	2021-04-30	M	autochthonous	1
120020	30to39	2021-05-01	F	opened	1
120020	30to39	2021-05-16	M	opened	1
120020	30to39	2021-11-18	M	opened	1
120020	30to39	2021-12-23	M	autochthonous	1
120020	40to49	2016-02-09	F	autochthonous	1
120020	40to49	2017-10-21	F	autochthonous	1
120020	40to49	2018-01-14	M	autochthonous	1
120020	40to49	2018-02-01	M	autochthonous	1
120020	40to49	2018-02-20	M	autochthonous	1
120020	40to49	2018-03-28	F	autochthonous	1
120020	40to49	2018-05-20	M	autochthonous	1
120020	40to49	2018-09-03	F	autochthonous	1
120020	40to49	2020-11-18	M	opened	1
120020	40to49	2021-01-01	F	autochthonous	1
120020	40to49	2021-01-13	F	autochthonous	1
120020	40to49	2021-01-14	M	autochthonous	1
120020	40to49	2021-01-16	F	autochthonous	1
120020	40to49	2021-02-10	M	opened	1
120020	40to49	2021-02-26	F	opened	1
120020	40to49	2021-06-30	M	opened	1
120020	50to59	2017-10-05	M	opened	1
120020	50to59	2018-01-19	F	autochthonous	1
120020	50to59	2018-01-25	M	autochthonous	1
120020	50to59	2018-02-01	F	autochthonous	1
120020	50to59	2018-02-06	F	autochthonous	1
120020	50to59	2018-07-06	F	autochthonous	1
120020	50to59	2018-09-06	F	opened	1
120020	50to59	2020-01-20	F	autochthonous	1
120020	50to59	2020-05-24	F	opened	1
120020	50to59	2021-01-18	F	autochthonous	1
120020	50to59	2021-01-24	F	autochthonous	1
120020	50to59	2021-09-13	F	opened	1
120020	60to69	2018-03-15	F	autochthonous	1
120020	60to69	2020-05-13	M	opened	1
120020	60to69	2020-11-26	M	opened	1
120020	60to69	2021-01-14	M	autochthonous	1
120020	60to69	2021-01-18	F	autochthonous	1
120020	60to69	2021-03-25	F	autochthonous	1
120020	60to69	2021-06-09	M	opened	1
120020	60to69	2021-06-10	M	opened	1
120020	60to69	2021-10-24	M	opened	1
120020	70to79	2018-09-29	F	autochthonous	1
120020	70to79	2020-01-28	M	opened	1
120020	70to79	2020-05-23	M	opened	1
120020	>= 80	2018-01-18	F	autochthonous	1
120020	>= 80	2018-04-14	F	autochthonous	1
120025	0to4	2016-02-16	F	autochthonous	1
120025	0to4	2017-10-20	F	opened	1
120025	0to4	2018-03-16	M	opened	1
120025	0to4	2018-11-03	M	autochthonous	1
120025	0to4	2019-12-08	M	opened	1
120025	5to9	2015-12-11	F	autochthonous	1
120025	5to9	2016-02-07	M	autochthonous	1
120025	5to9	2019-02-05	F	opened	1
120025	5to9	2019-12-01	M	opened	1
120025	10to14	2016-03-25	F	Undetermined	1
120025	10to14	2016-03-28	F	opened	1
120025	10to14	2016-04-08	M	opened	1
120025	10to14	2016-04-09	F	Undetermined	1
120025	10to14	2016-04-26	M	Undetermined	1
120025	10to14	2016-05-02	F	opened	1
120025	15to19	2016-02-01	F	autochthonous	1
120025	15to19	2016-02-04	M	autochthonous	1
120025	15to19	2016-03-13	F	Undetermined	1
120025	15to19	2016-04-10	M	Undetermined	1
120025	15to19	2016-04-26	F	opened	1
120025	15to19	2017-01-05	M	opened	1
120025	15to19	2020-11-06	M	opened	1
120025	20to29	2016-02-01	F	autochthonous	1
120025	20to29	2016-02-05	M	autochthonous	1
120025	20to29	2016-02-22	F	autochthonous	1
120025	20to29	2016-02-23	F	autochthonous	1
120025	20to29	2016-03-09	M	Undetermined	1
120025	20to29	2016-04-04	F	Undetermined	1
120025	20to29	2016-04-08	F	Undetermined	1
120025	20to29	2016-04-20	M	Undetermined	1
120025	30to39	2015-12-16	F	autochthonous	1
120025	30to39	2016-01-11	M	autochthonous	1
120025	30to39	2016-01-24	F	autochthonous	1
120025	30to39	2016-02-04	F	autochthonous	1
120025	30to39	2016-02-06	F	autochthonous	1
120025	30to39	2016-02-08	M	autochthonous	1
120025	30to39	2016-02-10	F	autochthonous	1
120025	30to39	2016-02-20	F	Undetermined	1
120025	30to39	2016-03-02	M	autochthonous	1
120025	30to39	2016-03-09	M	autochthonous	1
120025	30to39	2016-03-18	F	autochthonous	1
120025	30to39	2016-03-26	F	Undetermined	1
120025	30to39	2016-04-08	F	Undetermined	1
120025	30to39	2016-04-12	F	opened	1
120025	30to39	2016-04-21	F	opened	1
120025	30to39	2016-04-24	F	opened	1
120025	30to39	2016-05-31	F	opened	1
120025	30to39	2017-01-18	F	opened	1
120025	30to39	2017-01-26	M	opened	1
120025	30to39	2017-05-13	M	opened	1
120025	30to39	2017-09-14	F	opened	1
120025	40to49	2015-12-24	F	autochthonous	1
120025	40to49	2016-01-13	F	autochthonous	1
120025	40to49	2016-02-05	F	Undetermined	1
120025	40to49	2016-04-13	F	Undetermined	1
120025	40to49	2016-04-16	F	Undetermined	1
120025	40to49	2016-04-21	F	Undetermined	1
120025	40to49	2016-04-24	F	opened	1
120025	40to49	2017-01-18	F	opened	1
120025	40to49	2017-01-22	F	opened	1
120025	40to49	2017-01-23	M	opened	1
120025	40to49	2017-01-28	F	opened	1
120025	40to49	2017-04-07	F	opened	1
120025	40to49	2017-05-16	M	opened	1
120025	50to59	2016-02-08	F	autochthonous	1
120025	50to59	2016-03-15	F	Undetermined	1
120025	50to59	2016-03-26	F	Undetermined	1
120025	50to59	2016-03-31	F	Undetermined	1
120025	50to59	2016-04-02	M	opened	1
120025	50to59	2016-12-07	F	opened	1
120025	50to59	2018-07-28	F	opened	1
120025	50to59	2018-10-21	F	opened	1
120025	50to59	2019-05-29	F	opened	1
120025	50to59	2021-01-06	F	opened	1
120025	60to69	2016-03-20	F	Undetermined	1
120025	60to69	2016-04-20	F	Undetermined	1
120025	60to69	2017-06-03	F	opened	1
120025	60to69	2017-10-12	M	opened	1
120025	70to79	2016-01-28	F	autochthonous	1
120025	70to79	2016-03-23	M	Undetermined	1
120025	70to79	2016-04-01	M	Undetermined	1
120025	70to79	2016-04-20	M	opened	1
120030	20to29	2021-09-24	M	autochthonous	1
120030	20to29	2021-11-01	F	autochthonous	1
120030	30to39	2021-10-06	M	autochthonous	1
120033	0to4	2021-03-09	M	opened	1
120033	0to4	2021-03-10	F	autochthonous	1
120033	5to9	2021-01-18	M	autochthonous	1
120033	5to9	2021-03-01	M	autochthonous	1
120033	5to9	2021-03-02	F	autochthonous	1
120033	5to9	2021-03-06	M	autochthonous	1
120033	5to9	2021-03-10	M	autochthonous	1
120033	5to9	2021-03-11	F	autochthonous	1
120033	5to9	2021-03-18	M	autochthonous	1
120033	10to14	2021-02-08	M	autochthonous	1
120033	10to14	2021-03-08	F	autochthonous	1
120033	10to14	2021-03-15	M	autochthonous	1
120033	10to14	2021-03-19	M	autochthonous	1
120033	10to14	2021-03-20	M	autochthonous	1
120033	10to14	2021-06-29	F	autochthonous	1
120033	15to19	2021-01-10	F	autochthonous	1
120033	15to19	2021-01-25	F	autochthonous	1
120033	15to19	2021-01-26	F	autochthonous	1
120033	15to19	2021-02-19	M	autochthonous	1
120033	15to19	2021-02-25	F	autochthonous	1
120033	15to19	2021-03-04	F	autochthonous	1
120033	15to19	2021-03-17	M	autochthonous	1
120033	15to19	2021-03-27	F	opened	1
120033	15to19	2021-06-01	F	autochthonous	1
120033	15to19	2021-09-25	F	autochthonous	1
120033	20to29	2020-06-11	F	opened	1
120033	20to29	2020-11-20	F	autochthonous	1
120033	20to29	2020-12-28	F	autochthonous	1
120033	20to29	2020-12-30	M	autochthonous	1
120033	20to29	2021-01-01	F	autochthonous	1
120033	20to29	2021-01-29	F	autochthonous	1
120033	20to29	2021-02-09	M	autochthonous	1
120033	20to29	2021-02-18	F	autochthonous	1
120033	20to29	2021-02-19	M	autochthonous	1
120033	20to29	2021-03-01	F	autochthonous	2
120033	20to29	2021-03-02	M	autochthonous	1
120033	20to29	2021-03-10	F	autochthonous	1
120033	20to29	2021-03-14	M	autochthonous	1
120033	20to29	2021-03-15	F	autochthonous	1
120033	20to29	2021-03-20	F	autochthonous	1
120033	20to29	2021-06-08	F	autochthonous	1
120033	20to29	2021-07-02	F	autochthonous	1
120033	20to29	2021-07-19	M	autochthonous	1
120033	30to39	2020-09-23	M	autochthonous	1
120033	30to39	2021-01-01	F	autochthonous	1
120033	30to39	2021-01-05	F	autochthonous	1
120033	30to39	2021-01-07	M	autochthonous	1
120033	30to39	2021-01-12	F	autochthonous	1
120033	30to39	2021-01-14	F	autochthonous	1
120033	30to39	2021-01-18	F	autochthonous	1
120033	30to39	2021-01-29	F	autochthonous	1
120033	30to39	2021-02-06	F	autochthonous	1
120033	30to39	2021-02-20	F	autochthonous	1
120033	30to39	2021-02-25	F	autochthonous	2
120033	30to39	2021-02-28	M	autochthonous	1
120033	30to39	2021-03-01	F	autochthonous	1
120033	30to39	2021-03-06	M	autochthonous	2
120033	30to39	2021-03-10	F	autochthonous	2
120033	30to39	2021-03-14	F	autochthonous	1
120033	30to39	2021-03-15	F	autochthonous	1
120033	30to39	2021-03-16	M	autochthonous	1
120033	30to39	2021-03-25	F	autochthonous	1
120033	30to39	2021-05-18	F	autochthonous	1
120033	30to39	2021-06-28	M	autochthonous	1
120033	30to39	2021-07-20	F	autochthonous	1
120033	40to49	2021-01-15	F	autochthonous	1
120033	40to49	2021-02-01	M	autochthonous	1
120033	40to49	2021-02-09	M	autochthonous	1
120033	40to49	2021-02-18	M	autochthonous	1
120033	40to49	2021-02-19	F	autochthonous	1
120033	40to49	2021-03-05	F	autochthonous	1
120033	40to49	2021-03-10	F	autochthonous	1
120033	40to49	2021-03-16	M	autochthonous	1
120033	40to49	2021-04-01	M	autochthonous	1
120033	40to49	2021-05-25	F	autochthonous	1
120033	50to59	2021-01-25	M	autochthonous	1
120033	50to59	2021-02-20	M	autochthonous	1
120033	50to59	2021-02-24	M	autochthonous	1
120033	50to59	2021-10-01	F	autochthonous	1
120033	60to69	2020-04-10	M	opened	1
120033	60to69	2020-11-15	M	autochthonous	1
120033	60to69	2020-12-28	F	autochthonous	1
120033	60to69	2021-01-01	F	autochthonous	1
120033	60to69	2021-02-02	F	autochthonous	1
120033	60to69	2021-02-25	F	autochthonous	1
120033	60to69	2021-03-08	F	autochthonous	1
120033	60to69	2021-03-08	F	opened	1
120033	60to69	2021-03-13	M	autochthonous	1
120033	60to69	2021-03-14	F	autochthonous	1
120033	70to79	2021-09-20	M	autochthonous	1
120034	60to69	2020-08-08	F	opened	1
120035	30to39	2021-03-18	F	opened	1
120035	40to49	2021-02-21	F	autochthonous	1
120038	10to14	2018-07-05	M	opened	1
120039	5to9	2020-02-16	M	opened	1
120039	50to59	2020-12-14	M	opened	1
120040	0to4	2016-03-06	F	autochthonous	1
120040	0to4	2016-04-23	M	autochthonous	1
120040	0to4	2016-06-06	F	autochthonous	1
120040	0to4	2016-06-13	M	autochthonous	1
120040	0to4	2018-03-01	F	opened	1
120040	0to4	2018-06-05	F	autochthonous	1
120040	0to4	2018-06-17	F	opened	1
120040	0to4	2018-08-15	M	autochthonous	1
120040	0to4	2020-07-28	F	opened	1
120040	0to4	2021-06-04	F	autochthonous	1
120040	5to9	2016-06-06	F	autochthonous	1
120040	5to9	2017-04-25	M	opened	1
120040	5to9	2017-06-04	F	opened	1
120040	5to9	2017-11-10	F	opened	1
120040	5to9	2018-02-23	M	autochthonous	1
120040	5to9	2018-06-14	M	autochthonous	1
120040	5to9	2018-06-14	M	opened	1
120040	5to9	2018-06-17	M	autochthonous	1
120040	5to9	2018-08-10	M	autochthonous	1
120040	5to9	2018-08-11	F	autochthonous	1
120040	5to9	2018-08-15	F	autochthonous	1
120040	5to9	2018-08-24	F	autochthonous	1
120040	5to9	2018-09-22	M	autochthonous	1
120040	5to9	2018-11-17	F	opened	1
120040	5to9	2018-11-28	M	autochthonous	1
120040	5to9	2018-12-31	F	autochthonous	1
120040	5to9	2019-01-10	M	opened	1
120040	5to9	2020-06-20	F	autochthonous	1
120040	5to9	2020-11-09	F	opened	1
120040	10to14	2016-05-13	M	opened	1
120040	10to14	2016-06-06	F	autochthonous	1
120040	10to14	2017-04-12	F	opened	1
120040	10to14	2017-05-08	M	opened	2
120040	10to14	2018-03-04	M	opened	1
120040	10to14	2018-03-07	M	opened	1
120040	10to14	2018-08-06	F	autochthonous	1
120040	10to14	2018-08-13	F	autochthonous	1
120040	10to14	2018-09-17	F	opened	1
120040	10to14	2018-10-21	M	opened	1
120040	15to19	2016-02-21	M	autochthonous	1
120040	15to19	2016-02-29	F	autochthonous	1
120040	15to19	2016-06-03	F	autochthonous	1
120040	15to19	2016-06-24	F	autochthonous	1
120040	15to19	2016-09-28	M	opened	1
120040	15to19	2016-12-24	F	opened	1
120040	15to19	2017-08-28	M	opened	1
120040	15to19	2017-12-09	F	opened	1
120040	15to19	2017-12-26	F	opened	1
120040	15to19	2018-02-20	F	autochthonous	1
120040	15to19	2018-03-23	F	opened	1
120040	15to19	2018-08-09	F	autochthonous	1
120040	15to19	2018-12-17	F	opened	1
120040	15to19	2020-07-01	F	opened	1
120040	15to19	2021-01-26	F	opened	1
120040	20to29	2016-01-20	M	autochthonous	1
120040	20to29	2016-03-14	M	autochthonous	1
120040	20to29	2016-03-17	M	autochthonous	1
120040	20to29	2016-03-19	F	autochthonous	1
120040	20to29	2016-04-11	F	autochthonous	1
120040	20to29	2016-04-18	F	autochthonous	1
120040	20to29	2016-05-09	F	autochthonous	1
120040	20to29	2016-05-11	M	opened	1
120040	20to29	2016-05-13	M	opened	1
120040	20to29	2016-05-17	F	opened	1
120040	20to29	2016-05-26	F	autochthonous	1
120040	20to29	2016-06-01	F	autochthonous	2
120040	20to29	2016-06-03	M	autochthonous	1
120040	20to29	2016-06-06	F	autochthonous	1
120040	20to29	2016-06-07	M	autochthonous	1
120040	20to29	2016-06-08	M	autochthonous	1
120040	20to29	2016-06-19	F	autochthonous	1
120040	20to29	2016-11-19	F	opened	1
120040	20to29	2016-11-25	F	opened	1
120040	20to29	2016-12-25	M	opened	1
120040	20to29	2017-01-23	M	opened	1
120040	20to29	2017-03-01	F	autochthonous	1
120040	20to29	2017-03-14	F	opened	1
120040	20to29	2017-07-10	F	opened	1
120040	20to29	2017-07-20	F	autochthonous	1
120040	20to29	2017-07-30	F	opened	1
120040	20to29	2017-11-11	F	opened	1
120040	20to29	2018-01-16	F	opened	1
120040	20to29	2018-02-24	M	opened	1
120040	20to29	2018-02-28	F	opened	1
120040	20to29	2018-03-01	F	opened	1
120040	20to29	2018-03-31	F	opened	1
120040	20to29	2018-04-04	F	opened	1
120040	20to29	2018-05-02	F	opened	1
120040	20to29	2018-05-30	F	opened	1
120040	20to29	2018-06-24	F	opened	1
120040	20to29	2018-07-16	F	opened	1
120040	20to29	2018-07-26	F	autochthonous	1
120040	20to29	2018-08-01	F	opened	1
120040	20to29	2018-08-07	F	opened	1
120040	20to29	2018-08-15	F	autochthonous	1
120040	20to29	2018-08-18	F	autochthonous	1
120040	20to29	2018-08-20	M	autochthonous	1
120040	20to29	2018-09-29	F	opened	1
120040	20to29	2018-11-16	F	opened	2
120040	20to29	2018-12-01	F	opened	1
120040	20to29	2018-12-23	M	opened	1
120040	20to29	2019-01-14	M	opened	1
120040	20to29	2019-01-15	F	opened	1
120040	20to29	2019-02-04	F	autochthonous	1
120040	20to29	2019-07-13	F	autochthonous	1
120040	20to29	2020-01-20	F	opened	1
120040	20to29	2020-05-23	M	opened	1
120040	20to29	2020-11-16	F	opened	2
120040	30to39	2016-02-01	F	opened	1
120040	30to39	2016-02-17	M	autochthonous	1
120040	30to39	2016-02-21	F	autochthonous	1
120040	30to39	2016-03-07	M	autochthonous	1
120040	30to39	2016-03-08	F	autochthonous	1
120040	30to39	2016-03-31	F	autochthonous	1
120040	30to39	2016-04-01	M	autochthonous	1
120040	30to39	2016-04-09	M	autochthonous	1
120040	30to39	2016-04-14	M	autochthonous	1
120040	30to39	2016-04-19	F	autochthonous	1
120040	30to39	2016-05-01	F	opened	1
120040	30to39	2016-05-03	F	opened	1
120040	30to39	2016-05-25	F	autochthonous	1
120040	30to39	2016-05-29	F	autochthonous	1
120040	30to39	2016-06-05	M	autochthonous	1
120040	30to39	2016-06-09	F	autochthonous	2
120040	30to39	2016-06-13	F	autochthonous	1
120040	30to39	2016-06-14	F	autochthonous	1
120040	30to39	2016-06-16	M	autochthonous	1
120040	30to39	2016-07-08	F	opened	1
120040	30to39	2016-11-25	M	opened	1
120040	30to39	2017-02-08	F	opened	1
120040	30to39	2017-03-23	F	opened	2
120040	30to39	2017-06-01	F	opened	1
120040	30to39	2017-06-26	F	opened	1
120040	30to39	2017-10-01	F	autochthonous	1
120040	30to39	2017-12-01	F	opened	1
120040	30to39	2017-12-17	F	opened	1
120040	30to39	2018-01-01	M	opened	1
120040	30to39	2018-02-02	F	opened	1
120040	30to39	2018-02-15	F	opened	1
120040	30to39	2018-02-19	M	autochthonous	1
120040	30to39	2018-03-08	M	opened	1
120040	30to39	2018-06-05	F	opened	1
120040	30to39	2018-08-01	M	opened	1
120040	30to39	2018-08-20	M	autochthonous	1
120040	30to39	2018-09-09	F	autochthonous	1
120040	30to39	2018-09-15	F	autochthonous	1
120040	30to39	2018-10-07	F	autochthonous	1
120040	30to39	2018-10-29	M	opened	1
120040	30to39	2018-11-02	F	autochthonous	1
120040	30to39	2018-11-02	F	opened	1
120040	30to39	2018-11-05	F	autochthonous	1
120040	30to39	2018-11-28	F	opened	1
120040	30to39	2019-01-04	F	autochthonous	1
120040	30to39	2019-01-08	M	opened	1
120040	30to39	2019-01-17	F	opened	1
120040	30to39	2019-02-05	M	autochthonous	1
120040	30to39	2020-01-18	F	autochthonous	1
120040	30to39	2020-04-15	F	autochthonous	1
120040	30to39	2020-07-15	F	opened	1
120040	30to39	2020-07-19	M	opened	1
120040	30to39	2020-12-22	F	opened	1
120040	30to39	2020-12-25	M	opened	1
120040	40to49	2016-01-30	M	autochthonous	1
120040	40to49	2016-03-02	M	autochthonous	1
120040	40to49	2016-03-09	M	autochthonous	1
120040	40to49	2016-03-15	F	autochthonous	1
120040	40to49	2016-06-02	M	autochthonous	1
120040	40to49	2016-06-03	M	autochthonous	1
120040	40to49	2016-06-05	F	autochthonous	1
120040	40to49	2017-01-26	M	opened	1
120040	40to49	2017-04-30	F	opened	1
120040	40to49	2017-12-25	F	opened	1
120040	40to49	2018-01-17	F	opened	1
120040	40to49	2018-02-16	F	opened	1
120040	40to49	2018-02-20	M	opened	1
120040	40to49	2018-03-04	F	opened	1
120040	40to49	2018-06-17	M	autochthonous	1
120040	40to49	2018-07-18	M	autochthonous	1
120040	40to49	2018-08-17	F	autochthonous	2
120040	40to49	2018-08-18	F	autochthonous	1
120040	40to49	2018-10-02	F	autochthonous	1
120040	40to49	2018-10-03	F	autochthonous	1
120040	40to49	2018-10-04	F	autochthonous	1
120040	40to49	2018-10-27	F	autochthonous	1
120040	40to49	2019-01-07	F	opened	1
120040	40to49	2019-01-10	F	opened	1
120040	40to49	2019-01-14	F	opened	1
120040	40to49	2019-01-28	F	autochthonous	1
120040	40to49	2019-02-10	F	autochthonous	1
120040	40to49	2020-07-10	F	opened	1
120040	40to49	2020-07-19	F	opened	1
120040	40to49	2021-03-19	F	opened	1
120040	40to49	2021-07-29	F	opened	1
120040	50to59	2016-03-08	F	autochthonous	1
120040	50to59	2016-03-19	F	autochthonous	1
120040	50to59	2016-03-20	F	autochthonous	1
120040	50to59	2016-03-25	M	autochthonous	1
120040	50to59	2016-06-06	F	autochthonous	1
120040	50to59	2016-06-20	M	autochthonous	1
120040	50to59	2016-10-09	F	opened	1
120040	50to59	2017-03-08	F	opened	1
120040	50to59	2017-07-01	M	opened	1
120040	50to59	2018-02-17	F	autochthonous	1
120040	50to59	2018-03-13	F	opened	1
120040	50to59	2018-10-26	M	opened	1
120040	50to59	2019-01-19	M	opened	1
120040	50to59	2019-01-31	M	autochthonous	1
120040	50to59	2020-05-29	F	opened	1
120040	50to59	2020-09-04	M	opened	1
120040	50to59	2021-03-07	F	autochthonous	1
120040	60to69	2016-03-07	F	autochthonous	1
120040	60to69	2016-03-21	F	autochthonous	2
120040	60to69	2016-03-22	M	autochthonous	1
120040	60to69	2016-03-25	F	autochthonous	1
120040	60to69	2016-06-01	M	autochthonous	1
120040	60to69	2016-11-14	M	opened	1
120040	60to69	2018-02-02	M	opened	1
120040	60to69	2019-01-09	F	opened	1
120040	60to69	2019-01-19	M	opened	1
120040	60to69	2020-05-31	F	opened	1
120040	60to69	2020-07-05	F	opened	1
120040	60to69	2020-07-13	F	opened	1
120040	60to69	2020-07-25	M	opened	1
120040	70to79	2016-03-17	F	autochthonous	1
120040	70to79	2019-01-04	M	opened	1
120040	70to79	2019-01-07	F	opened	1
120040	>= 80	2016-06-01	M	autochthonous	1
120040	>= 80	2020-05-13	M	opened	1
120040	>= 80	2020-06-07	M	opened	1
120042	20to29	2017-10-08	M	opened	1
120042	20to29	2021-02-24	M	autochthonous	1
120042	20to29	2021-10-07	M	opened	1
120042	30to39	2021-02-20	M	autochthonous	1
120042	30to39	2021-02-22	F	autochthonous	1
120042	30to39	2021-03-30	M	opened	1
120042	40to49	2021-02-23	M	autochthonous	1
120045	40to49	2018-02-23	F	opened	1
120050	40to49	2021-03-30	F	autochthonous	1
120060	0to4	2018-10-20	F	autochthonous	1
120060	0to4	2018-11-15	M	autochthonous	1
120060	0to4	2018-11-22	M	autochthonous	1
120060	0to4	2018-12-01	F	autochthonous	1
120060	0to4	2018-12-03	M	autochthonous	1
120060	0to4	2018-12-20	F	autochthonous	1
120060	0to4	2019-03-17	F	autochthonous	1
120060	0to4	2021-01-27	F	autochthonous	1
120060	0to4	2021-03-15	M	autochthonous	1
120060	0to4	2021-03-17	M	autochthonous	1
120060	5to9	2018-10-28	F	autochthonous	1
120060	5to9	2018-11-19	F	autochthonous	1
120060	5to9	2021-03-30	M	autochthonous	1
120060	10to14	2018-10-24	M	autochthonous	1
120060	10to14	2018-11-14	F	autochthonous	1
120060	10to14	2018-12-20	M	autochthonous	1
120060	10to14	2019-01-06	F	autochthonous	1
120060	10to14	2021-01-12	M	autochthonous	1
120060	15to19	2018-06-24	F	autochthonous	1
120060	15to19	2018-09-02	F	autochthonous	1
120060	15to19	2018-10-30	M	autochthonous	1
120060	15to19	2018-11-01	F	autochthonous	1
120060	15to19	2018-11-16	M	autochthonous	1
120060	15to19	2018-11-19	F	autochthonous	1
120060	15to19	2018-12-13	F	autochthonous	1
120060	15to19	2019-01-11	M	autochthonous	1
120060	15to19	2019-02-20	F	autochthonous	1
120060	15to19	2019-02-21	F	autochthonous	1
120060	15to19	2021-03-12	F	autochthonous	1
120060	15to19	2021-03-15	M	autochthonous	1
120060	15to19	2021-03-17	M	autochthonous	1
120060	15to19	2021-03-21	F	autochthonous	1
120060	20to29	2018-07-10	F	autochthonous	1
120060	20to29	2018-07-28	F	autochthonous	1
120060	20to29	2018-10-17	F	autochthonous	1
120060	20to29	2018-10-21	F	autochthonous	1
120060	20to29	2018-10-27	F	autochthonous	1
120060	20to29	2018-10-27	F	opened	1
120060	20to29	2018-10-28	M	autochthonous	1
120060	20to29	2018-10-29	F	autochthonous	1
120060	20to29	2018-11-01	F	autochthonous	1
120060	20to29	2018-11-04	F	autochthonous	1
120060	20to29	2018-11-08	F	autochthonous	1
120060	20to29	2018-11-08	M	autochthonous	1
120060	20to29	2018-11-11	M	autochthonous	1
120060	20to29	2018-11-14	F	autochthonous	1
120060	20to29	2018-11-16	F	autochthonous	2
120060	20to29	2018-11-17	F	autochthonous	1
120060	20to29	2018-11-28	F	autochthonous	1
120060	20to29	2018-11-30	F	autochthonous	1
120060	20to29	2018-12-03	F	autochthonous	1
120060	20to29	2018-12-13	M	autochthonous	1
120060	20to29	2018-12-14	F	autochthonous	1
120060	20to29	2018-12-15	M	autochthonous	1
120060	20to29	2018-12-20	F	autochthonous	1
120060	20to29	2018-12-23	M	autochthonous	1
120060	20to29	2019-01-09	F	autochthonous	1
120060	20to29	2019-01-15	F	autochthonous	1
120060	20to29	2019-01-22	F	autochthonous	2
120060	20to29	2019-02-23	M	autochthonous	1
120060	20to29	2021-01-08	F	autochthonous	1
120060	20to29	2021-01-10	F	autochthonous	1
120060	20to29	2021-01-13	M	autochthonous	1
120060	20to29	2021-01-15	F	autochthonous	1
120060	20to29	2021-01-23	M	autochthonous	1
120060	20to29	2021-03-15	F	autochthonous	2
120060	30to39	2018-09-02	M	autochthonous	1
120060	30to39	2018-10-08	F	autochthonous	1
120060	30to39	2018-10-12	M	autochthonous	1
120060	30to39	2018-10-14	F	autochthonous	1
120060	30to39	2018-10-16	M	autochthonous	1
120060	30to39	2018-10-27	F	autochthonous	2
120060	30to39	2018-10-28	F	autochthonous	1
120060	30to39	2018-10-31	F	autochthonous	1
120060	30to39	2018-11-01	F	autochthonous	1
120060	30to39	2018-11-01	M	autochthonous	1
120060	30to39	2018-11-03	F	autochthonous	3
120060	30to39	2018-11-05	F	autochthonous	1
120060	30to39	2018-11-06	F	autochthonous	1
120060	30to39	2018-11-15	F	autochthonous	1
120060	30to39	2018-11-19	M	autochthonous	1
120060	30to39	2018-12-02	F	autochthonous	1
120060	30to39	2018-12-13	F	autochthonous	2
120060	30to39	2018-12-18	F	autochthonous	1
120060	30to39	2019-01-13	M	autochthonous	1
120060	30to39	2019-01-14	F	autochthonous	1
120060	30to39	2019-01-16	F	autochthonous	1
120060	30to39	2019-01-16	M	autochthonous	1
120060	30to39	2020-12-23	F	autochthonous	1
120060	30to39	2021-01-01	F	autochthonous	1
120060	30to39	2021-01-13	M	autochthonous	2
120060	30to39	2021-01-14	F	autochthonous	1
120060	30to39	2021-01-16	F	autochthonous	1
120060	30to39	2021-03-03	F	autochthonous	1
120060	30to39	2021-03-13	F	autochthonous	1
120060	30to39	2021-03-13	M	autochthonous	1
120060	30to39	2021-03-16	F	autochthonous	1
120060	30to39	2021-03-17	F	autochthonous	1
120060	30to39	2021-03-21	F	autochthonous	1
120060	30to39	2021-04-08	F	autochthonous	1
120060	40to49	2018-09-28	F	autochthonous	1
120060	40to49	2018-10-04	F	opened	1
120060	40to49	2018-10-07	F	autochthonous	1
120060	40to49	2018-10-10	F	autochthonous	1
120060	40to49	2018-10-20	F	autochthonous	2
120060	40to49	2018-10-21	F	autochthonous	2
120060	40to49	2018-10-24	M	autochthonous	1
120060	40to49	2018-10-27	F	autochthonous	1
120060	40to49	2018-10-28	F	autochthonous	2
120060	40to49	2018-10-29	F	autochthonous	2
120060	40to49	2018-11-04	F	autochthonous	1
120060	40to49	2018-11-05	M	autochthonous	1
120060	40to49	2018-11-06	F	autochthonous	1
120060	40to49	2018-11-19	M	autochthonous	1
120060	40to49	2018-12-13	F	autochthonous	1
120060	40to49	2019-01-07	F	autochthonous	1
120060	40to49	2019-01-22	F	autochthonous	1
120060	40to49	2019-01-22	M	autochthonous	1
120060	40to49	2021-01-15	F	autochthonous	1
120060	40to49	2021-01-16	M	autochthonous	1
120060	40to49	2021-01-17	M	autochthonous	1
120060	40to49	2021-03-05	M	autochthonous	1
120060	40to49	2021-03-12	F	autochthonous	1
120060	40to49	2021-03-15	F	autochthonous	1
120060	50to59	2018-10-16	F	autochthonous	1
120060	50to59	2018-10-28	F	autochthonous	1
120060	50to59	2018-11-04	F	autochthonous	1
120060	50to59	2018-11-09	F	autochthonous	1
120060	50to59	2019-01-11	F	autochthonous	1
120060	50to59	2019-01-12	F	autochthonous	1
120060	50to59	2020-05-26	F	autochthonous	1
120060	50to59	2021-01-12	M	autochthonous	1
120060	50to59	2021-01-19	M	autochthonous	1
120060	50to59	2021-03-08	F	autochthonous	1
120060	50to59	2021-03-10	F	autochthonous	1
120060	50to59	2021-03-15	M	autochthonous	1
120060	50to59	2021-03-17	F	autochthonous	2
120060	60to69	2018-07-29	F	autochthonous	1
120060	60to69	2018-10-27	F	autochthonous	1
120060	60to69	2018-10-30	F	autochthonous	1
120060	60to69	2018-11-10	F	autochthonous	1
120060	60to69	2018-11-19	F	autochthonous	1
120060	60to69	2018-12-18	F	autochthonous	1
120060	60to69	2019-02-02	F	autochthonous	1
120060	60to69	2021-03-01	F	autochthonous	1
120060	70to79	2018-10-01	F	autochthonous	1
120060	70to79	2018-10-29	F	autochthonous	1
120060	70to79	2018-11-03	M	autochthonous	1
120060	70to79	2019-01-21	M	autochthonous	1
120060	70to79	2021-01-17	F	autochthonous	1
120060	>= 80	2018-10-26	F	autochthonous	1
120070	0to4	2018-06-13	M	Undetermined	1
120070	20to29	2017-01-19	M	Undetermined	1
120070	20to29	2021-04-26	F	Undetermined	1
120070	30to39	2021-02-25	F	Undetermined	1
120070	40to49	2021-02-26	M	Undetermined	1
120070	50to59	2021-01-04	F	Undetermined	1
120080	0to4	2018-12-01	M	autochthonous	1
120080	10to14	2018-08-31	F	opened	1
130002	0to4	2021-05-29	F	autochthonous	1
130040	0to4	2021-07-13	F	opened	1
130040	20to29	2016-12-16	M	autochthonous	1
130040	20to29	2017-03-23	F	Undetermined	1
130040	40to49	2020-04-07	F	opened	1
130040	60to69	2016-03-26	M	autochthonous	1
130063	20to29	2021-05-10	F	autochthonous	1
130063	20to29	2021-07-09	M	autochthonous	1
130063	30to39	2021-06-03	F	autochthonous	1
130063	30to39	2021-08-08	M	autochthonous	1
130063	40to49	2021-05-24	F	autochthonous	1
130063	50to59	2021-05-08	M	autochthonous	1
130080	0to4	2016-12-04	F	autochthonous	1
130080	5to9	2016-12-31	M	opened	1
130080	5to9	2017-01-27	M	opened	1
130080	10to14	2016-11-18	M	autochthonous	1
130080	10to14	2016-12-02	F	autochthonous	1
130080	10to14	2016-12-09	M	opened	1
130080	10to14	2017-03-09	F	opened	1
130080	15to19	2016-11-29	M	opened	1
130080	15to19	2017-01-29	F	opened	1
130080	15to19	2017-01-31	F	opened	1
130080	15to19	2017-02-17	F	opened	1
130080	15to19	2017-02-25	F	opened	1
130080	15to19	2017-03-01	M	opened	1
130080	20to29	2016-11-30	M	opened	1
130080	20to29	2016-12-01	F	opened	1
130080	20to29	2016-12-03	F	opened	1
130080	20to29	2016-12-05	M	opened	1
130080	20to29	2017-01-08	F	opened	1
130080	20to29	2017-01-13	F	autochthonous	1
130080	20to29	2017-03-14	F	opened	1
130080	30to39	2016-10-11	F	opened	1
130080	30to39	2016-11-25	F	autochthonous	1
130080	30to39	2016-11-28	M	autochthonous	1
130080	30to39	2017-02-19	F	opened	1
130080	30to39	2017-03-26	F	opened	1
130080	40to49	2016-11-24	F	autochthonous	1
130080	40to49	2016-12-01	F	opened	1
130080	50to59	2017-02-05	M	opened	1
130080	60to69	2017-01-29	M	opened	1
130080	60to69	2017-03-01	F	opened	1
130080	60to69	2017-04-20	M	opened	1
130083	15to19	2017-03-12	M	opened	1
130120	0to4	2021-07-20	M	autochthonous	1
130120	40to49	2016-07-16	M	autochthonous	1
130130	20to29	2021-06-26	M	autochthonous	1
130140	5to9	2021-07-04	M	autochthonous	1
130140	10to14	2021-01-04	F	opened	1
130160	10to14	2020-08-01	F	Undetermined	1
130170	10to14	2017-03-10	F	autochthonous	1
130170	15to19	2017-02-28	M	autochthonous	1
130170	20to29	2017-02-01	F	opened	1
130170	20to29	2017-02-20	F	autochthonous	1
130170	20to29	2017-02-28	F	autochthonous	1
130170	20to29	2017-04-01	M	autochthonous	1
130170	40to49	2017-02-01	F	autochthonous	1
130185	5to9	2021-07-04	F	opened	1
130185	15to19	2021-12-22	F	opened	1
130185	40to49	2021-09-06	F	autochthonous	1
130185	40to49	2021-10-06	F	autochthonous	1
130185	50to59	2017-02-22	M	autochthonous	1
130185	70to79	2021-10-12	M	autochthonous	1
130190	0to4	2021-05-17	M	autochthonous	1
130190	50to59	2018-07-11	M	autochthonous	1
130230	20to29	2021-12-11	M	opened	1
130250	0to4	2016-04-16	F	autochthonous	1
130250	0to4	2020-07-30	M	opened	1
130250	0to4	2021-09-24	M	opened	1
130250	5to9	2016-01-30	M	autochthonous	1
130250	20to29	2017-05-05	F	autochthonous	1
130250	20to29	2018-03-15	F	opened	1
130250	40to49	2017-04-26	M	autochthonous	1
130260	0to4	2015-12-29	M	autochthonous	1
130260	0to4	2016-04-04	M	autochthonous	1
130260	0to4	2016-04-05	F	autochthonous	1
130260	0to4	2016-04-06	M	autochthonous	1
130260	0to4	2016-04-08	F	autochthonous	1
130260	0to4	2016-04-09	F	autochthonous	1
130260	0to4	2016-04-10	F	autochthonous	1
130260	0to4	2016-04-12	F	autochthonous	1
130260	0to4	2016-04-14	M	autochthonous	1
130260	0to4	2016-04-15	F	autochthonous	3
130260	0to4	2016-04-16	F	autochthonous	1
130260	0to4	2016-04-18	F	autochthonous	1
130260	0to4	2016-04-18	M	autochthonous	1
130260	0to4	2016-04-19	F	autochthonous	1
130260	0to4	2016-04-19	M	autochthonous	1
130260	0to4	2016-04-20	F	autochthonous	1
130260	0to4	2016-04-22	M	autochthonous	1
130260	0to4	2016-04-24	F	autochthonous	1
130260	0to4	2016-04-26	F	autochthonous	1
130260	0to4	2016-04-27	M	autochthonous	1
130260	0to4	2016-04-28	F	autochthonous	2
130260	0to4	2016-04-28	M	autochthonous	1
130260	0to4	2016-08-06	F	autochthonous	1
130260	0to4	2016-08-31	M	opened	1
130260	0to4	2016-09-28	M	opened	1
130260	0to4	2016-11-21	M	autochthonous	1
130260	0to4	2016-12-06	F	autochthonous	1
130260	0to4	2017-01-01	F	autochthonous	1
130260	0to4	2017-01-15	F	autochthonous	1
130260	0to4	2017-02-11	M	Undetermined	1
130260	0to4	2017-03-07	F	Undetermined	1
130260	0to4	2017-05-08	F	autochthonous	1
130260	0to4	2017-05-08	F	Undetermined	1
130260	0to4	2019-12-25	M	opened	1
130260	0to4	2020-02-20	M	autochthonous	1
130260	0to4	2020-12-01	F	autochthonous	1
130260	0to4	2020-12-24	F	autochthonous	1
130260	0to4	2021-01-28	F	autochthonous	1
130260	0to4	2021-04-03	F	autochthonous	1
130260	0to4	2021-04-27	M	autochthonous	1
130260	0to4	2021-05-02	M	autochthonous	1
130260	0to4	2021-05-06	M	opened	1
130260	0to4	2021-06-08	M	opened	1
130260	0to4	2021-06-18	F	opened	1
130260	0to4	2021-06-19	F	opened	1
130260	0to4	2021-06-22	F	opened	1
130260	0to4	2021-07-08	F	autochthonous	1
130260	0to4	2021-07-13	F	autochthonous	1
130260	0to4	2021-07-25	F	opened	1
130260	0to4	2021-07-25	M	opened	1
130260	0to4	2021-09-01	F	opened	1
130260	0to4	2021-11-21	M	autochthonous	1
130260	5to9	2016-02-02	M	autochthonous	1
130260	5to9	2016-04-03	F	autochthonous	2
130260	5to9	2016-04-05	F	autochthonous	1
130260	5to9	2016-04-06	F	autochthonous	1
130260	5to9	2016-04-06	M	autochthonous	2
130260	5to9	2016-04-10	F	autochthonous	1
130260	5to9	2016-04-13	F	autochthonous	1
130260	5to9	2016-04-13	M	autochthonous	2
130260	5to9	2016-04-14	M	autochthonous	2
130260	5to9	2016-04-15	M	autochthonous	1
130260	5to9	2016-04-16	M	autochthonous	1
130260	5to9	2016-04-17	F	autochthonous	1
130260	5to9	2016-04-18	M	autochthonous	1
130260	5to9	2016-04-20	F	autochthonous	1
130260	5to9	2016-04-22	F	autochthonous	1
130260	5to9	2016-04-22	M	autochthonous	2
130260	5to9	2016-04-24	F	autochthonous	1
130260	5to9	2016-04-26	M	autochthonous	1
130260	5to9	2016-04-28	M	autochthonous	2
130260	5to9	2016-04-29	M	autochthonous	1
130260	5to9	2016-04-30	F	autochthonous	2
130260	5to9	2016-09-12	F	Undetermined	1
130260	5to9	2016-09-17	M	opened	1
130260	5to9	2016-12-17	F	autochthonous	1
130260	5to9	2017-01-15	M	Undetermined	1
130260	5to9	2017-02-13	M	Undetermined	1
130260	5to9	2017-04-02	F	Undetermined	1
130260	5to9	2018-03-20	F	Undetermined	1
130260	5to9	2021-03-23	M	autochthonous	1
130260	5to9	2021-03-26	M	opened	1
130260	5to9	2021-06-01	M	opened	1
130260	5to9	2021-07-06	F	autochthonous	1
130260	5to9	2021-07-26	M	opened	1
130260	5to9	2021-09-09	F	opened	1
130260	5to9	2021-09-25	F	autochthonous	1
130260	5to9	2021-09-27	M	opened	1
130260	10to14	2015-07-13	M	autochthonous	1
130260	10to14	2016-03-15	M	Undetermined	1
130260	10to14	2016-04-02	F	autochthonous	1
130260	10to14	2016-04-02	M	autochthonous	3
130260	10to14	2016-04-05	F	autochthonous	2
130260	10to14	2016-04-07	M	autochthonous	2
130260	10to14	2016-04-08	M	autochthonous	3
130260	10to14	2016-04-09	M	autochthonous	1
130260	10to14	2016-04-11	M	autochthonous	1
130260	10to14	2016-04-13	F	autochthonous	1
130260	10to14	2016-04-19	M	autochthonous	2
130260	10to14	2016-04-20	F	autochthonous	2
130260	10to14	2016-04-22	M	autochthonous	1
130260	10to14	2016-04-23	F	autochthonous	1
130260	10to14	2016-04-24	F	autochthonous	2
130260	10to14	2016-04-25	M	autochthonous	2
130260	10to14	2016-04-26	F	autochthonous	1
130260	10to14	2016-04-26	M	autochthonous	1
130260	10to14	2016-04-28	M	autochthonous	2
130260	10to14	2016-04-29	F	autochthonous	1
130260	10to14	2016-04-30	M	autochthonous	1
130260	10to14	2016-05-01	F	autochthonous	1
130260	10to14	2016-10-13	F	opened	1
130260	10to14	2019-02-01	M	opened	1
130260	10to14	2019-02-14	M	autochthonous	1
130260	10to14	2019-05-11	M	opened	1
130260	10to14	2019-05-17	M	opened	1
130260	10to14	2021-01-13	M	autochthonous	1
130260	10to14	2021-06-02	M	autochthonous	1
130260	10to14	2021-06-12	F	autochthonous	1
130260	10to14	2021-06-14	M	opened	1
130260	10to14	2021-07-14	F	autochthonous	1
130260	10to14	2021-07-16	F	opened	1
130260	10to14	2021-07-17	M	autochthonous	1
130260	15to19	2016-03-01	F	Undetermined	1
130260	15to19	2016-03-30	M	autochthonous	1
130260	15to19	2016-04-03	M	autochthonous	1
130260	15to19	2016-04-05	F	autochthonous	1
130260	15to19	2016-04-13	F	autochthonous	1
130260	15to19	2016-04-13	M	autochthonous	1
130260	15to19	2016-04-15	M	autochthonous	1
130260	15to19	2016-04-27	F	autochthonous	1
130260	15to19	2016-09-13	F	opened	1
130260	15to19	2016-11-01	F	autochthonous	1
130260	15to19	2016-12-12	F	autochthonous	1
130260	15to19	2016-12-12	F	Undetermined	1
130260	15to19	2017-01-13	F	autochthonous	1
130260	15to19	2017-03-06	F	autochthonous	1
130260	15to19	2017-06-21	M	autochthonous	1
130260	15to19	2019-01-06	F	autochthonous	1
130260	15to19	2019-02-20	F	autochthonous	1
130260	15to19	2020-09-28	F	opened	1
130260	15to19	2021-06-07	F	opened	1
130260	15to19	2021-07-10	M	autochthonous	1
130260	15to19	2021-07-27	F	opened	1
130260	20to29	2015-08-13	F	autochthonous	1
130260	20to29	2015-10-25	F	autochthonous	1
130260	20to29	2015-12-09	F	autochthonous	1
130260	20to29	2016-01-16	F	autochthonous	1
130260	20to29	2016-03-06	F	autochthonous	1
130260	20to29	2016-03-26	M	autochthonous	1
130260	20to29	2016-05-25	F	autochthonous	1
130260	20to29	2016-05-27	F	autochthonous	1
130260	20to29	2016-06-14	F	autochthonous	1
130260	20to29	2016-06-20	F	autochthonous	1
130260	20to29	2016-07-13	F	opened	1
130260	20to29	2016-08-03	F	opened	1
130260	20to29	2016-08-16	F	opened	1
130260	20to29	2016-09-10	F	Undetermined	1
130260	20to29	2016-09-14	M	autochthonous	1
130260	20to29	2016-10-27	F	Undetermined	2
130260	20to29	2016-10-27	M	Undetermined	1
130260	20to29	2016-11-09	F	autochthonous	1
130260	20to29	2016-12-08	F	autochthonous	1
130260	20to29	2016-12-12	F	Undetermined	1
130260	20to29	2016-12-19	F	autochthonous	1
130260	20to29	2017-01-24	F	autochthonous	1
130260	20to29	2017-01-27	F	autochthonous	1
130260	20to29	2017-03-02	F	autochthonous	1
130260	20to29	2017-03-05	F	Undetermined	1
130260	20to29	2017-04-10	F	opened	1
130260	20to29	2017-05-20	F	autochthonous	1
130260	20to29	2017-07-03	F	opened	1
130260	20to29	2019-01-10	F	opened	1
130260	20to29	2019-02-12	F	autochthonous	1
130260	20to29	2019-05-25	F	opened	1
130260	20to29	2019-05-25	M	autochthonous	1
130260	20to29	2019-05-25	M	opened	1
130260	20to29	2019-06-15	F	autochthonous	1
130260	20to29	2020-01-24	F	autochthonous	1
130260	20to29	2021-01-04	M	autochthonous	1
130260	20to29	2021-04-12	F	opened	1
130260	20to29	2021-05-15	M	opened	1
130260	20to29	2021-06-22	F	autochthonous	1
130260	20to29	2021-08-16	M	autochthonous	1
130260	20to29	2021-09-14	M	opened	1
130260	30to39	2015-08-25	F	autochthonous	1
130260	30to39	2015-09-04	F	autochthonous	1
130260	30to39	2015-09-07	F	autochthonous	1
130260	30to39	2015-09-29	F	autochthonous	1
130260	30to39	2016-01-29	M	Undetermined	1
130260	30to39	2016-01-30	M	Undetermined	1
130260	30to39	2016-02-01	F	autochthonous	1
130260	30to39	2016-02-02	F	autochthonous	1
130260	30to39	2016-02-05	F	autochthonous	1
130260	30to39	2016-03-03	F	autochthonous	1
130260	30to39	2016-03-06	F	Undetermined	1
130260	30to39	2016-03-09	F	autochthonous	1
130260	30to39	2016-03-21	F	autochthonous	1
130260	30to39	2016-03-31	M	autochthonous	2
130260	30to39	2016-04-15	F	autochthonous	1
130260	30to39	2016-04-19	F	autochthonous	1
130260	30to39	2016-04-26	F	autochthonous	1
130260	30to39	2016-06-18	F	autochthonous	1
130260	30to39	2016-07-20	F	Undetermined	1
130260	30to39	2016-11-08	M	autochthonous	1
130260	30to39	2016-11-15	M	opened	1
130260	30to39	2016-12-05	F	autochthonous	1
130260	30to39	2016-12-09	M	autochthonous	1
130260	30to39	2016-12-23	F	autochthonous	1
130260	30to39	2017-01-04	M	autochthonous	1
130260	30to39	2017-01-20	F	autochthonous	1
130260	30to39	2017-02-04	F	opened	1
130260	30to39	2017-02-23	M	autochthonous	1
130260	30to39	2017-03-08	F	autochthonous	1
130260	30to39	2017-03-10	M	opened	1
130260	30to39	2017-03-21	M	autochthonous	1
130260	30to39	2018-04-13	M	Undetermined	1
130260	30to39	2019-03-18	F	opened	1
130260	30to39	2019-05-02	F	opened	1
130260	30to39	2019-05-17	F	opened	1
130260	30to39	2019-05-26	F	opened	1
130260	30to39	2019-05-31	F	opened	1
130260	30to39	2019-06-06	F	autochthonous	1
130260	30to39	2019-06-11	F	opened	1
130260	30to39	2021-03-27	F	autochthonous	1
130260	30to39	2021-04-05	F	autochthonous	1
130260	30to39	2021-05-16	F	opened	1
130260	30to39	2021-07-21	F	autochthonous	1
130260	30to39	2021-07-31	M	autochthonous	1
130260	30to39	2021-08-24	M	autochthonous	1
130260	40to49	2015-07-11	F	autochthonous	1
130260	40to49	2015-08-14	F	autochthonous	1
130260	40to49	2015-12-25	M	autochthonous	1
130260	40to49	2016-02-13	M	autochthonous	1
130260	40to49	2016-03-21	M	autochthonous	1
130260	40to49	2016-04-11	F	autochthonous	1
130260	40to49	2016-05-04	F	opened	1
130260	40to49	2016-05-10	F	autochthonous	1
130260	40to49	2016-05-18	F	opened	1
130260	40to49	2016-07-01	F	autochthonous	1
130260	40to49	2016-07-10	F	opened	1
130260	40to49	2016-12-17	M	autochthonous	1
130260	40to49	2017-01-02	F	autochthonous	1
130260	40to49	2017-02-15	F	autochthonous	1
130260	40to49	2017-04-15	F	autochthonous	1
130260	40to49	2017-04-22	F	autochthonous	1
130260	40to49	2017-10-31	M	Undetermined	1
130260	40to49	2017-11-29	M	autochthonous	1
130260	40to49	2017-12-05	F	autochthonous	1
130260	40to49	2019-03-05	F	opened	1
130260	40to49	2019-03-17	F	autochthonous	1
130260	40to49	2019-03-22	F	opened	1
130260	40to49	2019-04-11	F	autochthonous	1
130260	40to49	2019-05-05	F	autochthonous	1
130260	40to49	2019-05-07	F	opened	1
130260	40to49	2019-05-17	F	opened	1
130260	40to49	2019-05-22	M	opened	1
130260	40to49	2019-05-30	F	opened	1
130260	40to49	2019-06-01	F	opened	1
130260	40to49	2019-06-03	F	autochthonous	1
130260	40to49	2019-06-05	F	opened	1
130260	40to49	2020-06-03	F	autochthonous	1
130260	40to49	2020-11-15	M	opened	1
130260	40to49	2021-05-16	M	autochthonous	1
130260	40to49	2021-07-01	F	autochthonous	1
130260	50to59	2015-04-12	F	autochthonous	1
130260	50to59	2015-07-15	M	autochthonous	1
130260	50to59	2015-07-20	F	autochthonous	1
130260	50to59	2015-07-27	M	autochthonous	1
130260	50to59	2015-12-24	F	autochthonous	1
130260	50to59	2016-01-18	F	autochthonous	1
130260	50to59	2016-01-23	M	autochthonous	1
130260	50to59	2016-06-20	F	opened	1
130260	50to59	2016-07-07	M	opened	1
130260	50to59	2016-07-09	F	opened	1
130260	50to59	2016-10-24	M	autochthonous	1
130260	50to59	2016-12-07	F	autochthonous	1
130260	50to59	2016-12-24	M	autochthonous	1
130260	50to59	2016-12-27	F	autochthonous	1
130260	50to59	2017-01-07	F	opened	1
130260	50to59	2017-02-07	F	autochthonous	1
130260	50to59	2017-02-10	F	Undetermined	1
130260	50to59	2017-02-17	M	autochthonous	1
130260	50to59	2017-03-06	M	autochthonous	1
130260	50to59	2017-03-07	M	autochthonous	1
130260	50to59	2017-03-18	M	Undetermined	1
130260	50to59	2017-04-07	F	autochthonous	1
130260	50to59	2017-06-04	F	autochthonous	1
130260	50to59	2017-07-26	F	autochthonous	1
130260	50to59	2017-08-14	F	autochthonous	1
130260	50to59	2019-03-22	F	opened	1
130260	50to59	2019-03-30	F	opened	1
130260	50to59	2019-04-07	F	autochthonous	1
130260	50to59	2019-05-09	F	opened	1
130260	50to59	2019-05-10	M	opened	1
130260	50to59	2019-05-20	F	opened	1
130260	50to59	2019-05-21	F	opened	1
130260	50to59	2019-05-31	M	opened	1
130260	50to59	2020-06-25	F	autochthonous	1
130260	50to59	2020-12-10	F	autochthonous	1
130260	50to59	2021-06-08	M	autochthonous	1
130260	60to69	2015-07-03	F	autochthonous	1
130260	60to69	2015-11-25	M	autochthonous	1
130260	60to69	2016-03-20	F	autochthonous	1
130260	60to69	2016-06-10	F	autochthonous	1
130260	60to69	2016-12-02	F	opened	1
130260	60to69	2017-05-11	F	autochthonous	1
130260	60to69	2019-03-17	F	opened	1
130260	60to69	2019-03-29	F	autochthonous	1
130260	60to69	2019-05-23	F	opened	1
130260	60to69	2021-08-07	F	Undetermined	1
130260	60to69	2021-10-27	F	autochthonous	1
130260	70to79	2015-07-10	F	autochthonous	1
130260	70to79	2016-08-25	M	opened	1
130260	70to79	2019-07-01	F	opened	1
130260	>= 80	2019-06-03	M	opened	1
130320	0to4	2017-03-30	M	autochthonous	1
130320	5to9	2017-01-02	M	autochthonous	1
130320	10to14	2017-02-13	M	autochthonous	1
130320	20to29	2017-01-17	M	autochthonous	1
130320	20to29	2017-01-26	M	autochthonous	1
130330	60to69	2016-07-17	M	autochthonous	1
130340	0to4	2016-08-05	F	autochthonous	1
130350	0to4	2020-07-21	M	opened	1
130353	5to9	2016-06-06	F	autochthonous	1
130353	5to9	2019-06-05	M	opened	1
130353	5to9	2021-06-21	F	autochthonous	1
130353	10to14	2016-07-16	M	autochthonous	1
130353	30to39	2016-06-06	F	autochthonous	1
130353	30to39	2021-01-08	M	opened	1
130353	40to49	2016-07-16	F	autochthonous	1
130353	40to49	2016-11-19	M	autochthonous	1
130353	50to59	2016-05-19	M	autochthonous	1
130353	50to59	2016-09-11	F	autochthonous	1
130353	70to79	2017-01-06	F	autochthonous	1
130353	70to79	2021-09-02	M	autochthonous	1
130356	0to4	2021-09-18	M	opened	1
130380	20to29	2019-12-10	M	autochthonous	1
130406	10to14	2021-09-08	M	opened	1
130406	10to14	2021-10-20	M	autochthonous	1
130406	15to19	2021-09-28	F	autochthonous	1
130406	20to29	2021-10-19	F	autochthonous	1
130406	20to29	2021-10-22	F	autochthonous	1
130406	30to39	2021-08-02	F	autochthonous	1
130406	40to49	2021-09-22	F	autochthonous	1
130406	40to49	2021-10-10	M	autochthonous	1
130410	15to19	2017-03-05	F	opened	1
130410	15to19	2017-03-17	M	opened	1
130410	20to29	2017-01-17	F	opened	1
130410	30to39	2017-01-15	M	opened	1
130410	40to49	2016-12-17	F	opened	1
130410	40to49	2017-03-15	F	opened	1
130410	50to59	2017-03-15	F	opened	1
130410	50to59	2021-08-13	F	opened	1
130420	0to4	2021-05-10	F	autochthonous	1
130420	0to4	2021-06-01	F	autochthonous	1
130420	0to4	2021-06-10	M	autochthonous	1
130420	0to4	2021-06-16	M	autochthonous	1
130420	0to4	2021-08-07	F	opened	1
130420	0to4	2021-08-27	M	autochthonous	1
130420	5to9	2021-06-01	M	autochthonous	1
130420	5to9	2021-06-02	M	autochthonous	1
130420	10to14	2019-02-14	F	autochthonous	1
130420	10to14	2021-05-14	F	autochthonous	1
130420	10to14	2021-05-30	F	autochthonous	1
130420	10to14	2021-06-10	M	autochthonous	1
130420	10to14	2021-06-24	M	autochthonous	1
130420	15to19	2021-05-28	M	autochthonous	1
130420	15to19	2021-07-17	F	opened	1
130420	20to29	2021-05-16	F	autochthonous	1
130420	20to29	2021-05-18	F	autochthonous	1
130420	20to29	2021-05-20	F	autochthonous	1
130420	20to29	2021-06-05	F	autochthonous	1
130420	20to29	2021-06-23	F	autochthonous	1
130420	20to29	2021-07-06	M	autochthonous	1
130420	20to29	2021-07-09	F	autochthonous	1
130420	20to29	2021-08-22	F	opened	1
130420	30to39	2021-06-01	M	autochthonous	1
130420	30to39	2021-06-06	M	autochthonous	1
130420	30to39	2021-07-04	F	autochthonous	1
130420	30to39	2021-07-15	M	opened	1
130420	30to39	2021-08-17	M	autochthonous	1
130420	40to49	2021-05-18	M	autochthonous	1
130420	40to49	2021-05-19	F	autochthonous	1
130420	40to49	2021-06-17	F	autochthonous	1
130420	40to49	2021-06-19	M	autochthonous	1
130420	40to49	2021-06-22	M	opened	1
130420	40to49	2021-06-25	F	opened	1
130420	40to49	2021-06-28	F	autochthonous	1
130420	40to49	2021-06-28	M	autochthonous	1
130420	60to69	2021-06-07	F	autochthonous	1
130420	70to79	2021-07-11	M	autochthonous	1
130420	70to79	2021-08-22	F	opened	1
140002	0to4	2017-06-10	F	opened	1
140002	5to9	2018-08-11	F	opened	1
140002	20to29	2017-06-25	M	opened	1
140002	30to39	2017-06-23	M	autochthonous	1
140002	40to49	2017-10-18	F	opened	1
140002	40to49	2020-06-08	F	autochthonous	1
140002	60to69	2017-07-10	F	autochthonous	1
140005	0to4	2017-06-16	F	autochthonous	1
140005	0to4	2017-10-13	F	autochthonous	1
140005	0to4	2021-10-16	F	autochthonous	1
140005	5to9	2017-07-31	F	autochthonous	1
140005	5to9	2021-09-01	F	opened	1
140005	20to29	2017-06-15	F	autochthonous	1
140005	20to29	2017-07-01	M	autochthonous	1
140005	20to29	2017-07-12	M	opened	1
140005	20to29	2017-07-24	F	autochthonous	1
140005	30to39	2016-09-03	M	autochthonous	1
140005	30to39	2017-03-02	M	autochthonous	1
140005	30to39	2017-06-16	F	autochthonous	1
140005	30to39	2021-06-10	F	autochthonous	1
140005	40to49	2017-03-13	M	opened	1
140005	40to49	2019-07-05	F	autochthonous	1
140005	50to59	2017-01-15	F	autochthonous	1
140010	0to4	2017-01-23	F	autochthonous	1
140010	0to4	2017-01-30	M	autochthonous	1
140010	0to4	2017-02-16	F	autochthonous	1
140010	0to4	2017-02-21	F	autochthonous	1
140010	0to4	2017-03-15	M	opened	1
140010	0to4	2017-03-27	M	opened	1
140010	0to4	2017-03-28	M	opened	1
140010	0to4	2017-03-29	F	autochthonous	1
140010	0to4	2017-04-12	M	autochthonous	1
140010	0to4	2017-04-15	M	autochthonous	1
140010	0to4	2017-04-22	F	autochthonous	1
140010	0to4	2017-05-04	F	autochthonous	2
140010	0to4	2017-05-10	F	autochthonous	1
140010	0to4	2017-05-17	F	autochthonous	1
140010	0to4	2017-05-24	M	autochthonous	1
140010	0to4	2017-05-25	M	autochthonous	1
140010	0to4	2017-05-31	M	autochthonous	1
140010	0to4	2017-06-01	M	autochthonous	1
140010	0to4	2017-06-02	F	opened	1
140010	0to4	2017-06-03	F	autochthonous	1
140010	0to4	2017-06-04	M	autochthonous	1
140010	0to4	2017-06-05	M	autochthonous	1
140010	0to4	2017-06-07	F	autochthonous	1
140010	0to4	2017-06-08	M	autochthonous	1
140010	0to4	2017-06-10	F	autochthonous	1
140010	0to4	2017-06-10	M	autochthonous	1
140010	0to4	2017-06-15	F	autochthonous	1
140010	0to4	2017-06-18	F	autochthonous	1
140010	0to4	2017-06-18	M	autochthonous	1
140010	0to4	2017-06-21	F	autochthonous	1
140010	0to4	2017-06-21	M	opened	1
140010	0to4	2017-06-24	M	autochthonous	1
140010	0to4	2017-06-25	F	autochthonous	2
140010	0to4	2017-06-29	M	autochthonous	2
140010	0to4	2017-06-30	M	autochthonous	2
140010	0to4	2017-07-04	F	autochthonous	1
140010	0to4	2017-07-06	F	opened	1
140010	0to4	2017-07-09	F	autochthonous	1
140010	0to4	2017-07-10	F	autochthonous	1
140010	0to4	2017-07-13	F	autochthonous	1
140010	0to4	2017-07-13	M	autochthonous	1
140010	0to4	2017-07-13	M	opened	1
140010	0to4	2017-07-15	F	autochthonous	1
140010	0to4	2017-07-16	M	autochthonous	1
140010	0to4	2017-07-17	F	autochthonous	1
140010	0to4	2017-07-18	F	opened	1
140010	0to4	2017-07-18	M	autochthonous	1
140010	0to4	2017-07-19	F	autochthonous	2
140010	0to4	2017-07-20	F	opened	1
140010	0to4	2017-07-21	F	autochthonous	1
140010	0to4	2017-07-23	M	autochthonous	1
140010	0to4	2017-07-24	F	autochthonous	1
140010	0to4	2017-07-24	F	opened	1
140010	0to4	2017-07-24	M	autochthonous	1
140010	0to4	2017-07-25	F	autochthonous	1
140010	0to4	2017-07-25	M	autochthonous	1
140010	0to4	2017-07-25	M	opened	2
140010	0to4	2017-07-27	F	autochthonous	1
140010	0to4	2017-07-27	M	autochthonous	2
140010	0to4	2017-07-27	M	opened	1
140010	0to4	2017-07-28	F	autochthonous	2
140010	0to4	2017-07-29	F	autochthonous	2
140010	0to4	2017-07-29	M	autochthonous	1
140010	0to4	2017-07-30	F	autochthonous	1
140010	0to4	2017-07-30	M	opened	1
140010	0to4	2017-07-31	F	opened	1
140010	0to4	2017-07-31	M	autochthonous	1
140010	0to4	2017-08-01	F	autochthonous	1
140010	0to4	2017-08-01	M	autochthonous	2
140010	0to4	2017-08-02	F	opened	1
140010	0to4	2017-08-03	F	autochthonous	1
140010	0to4	2017-08-04	M	autochthonous	1
140010	0to4	2017-08-05	F	autochthonous	1
140010	0to4	2017-08-05	M	autochthonous	3
140010	0to4	2017-08-07	M	autochthonous	1
140010	0to4	2017-08-08	F	autochthonous	1
140010	0to4	2017-08-08	F	opened	1
140010	0to4	2017-08-09	F	autochthonous	1
140010	0to4	2017-08-10	F	autochthonous	1
140010	0to4	2017-08-11	F	opened	1
140010	0to4	2017-08-15	M	autochthonous	1
140010	0to4	2017-08-16	F	autochthonous	1
140010	0to4	2017-08-19	F	autochthonous	1
140010	0to4	2017-08-19	M	autochthonous	1
140010	0to4	2017-08-20	M	autochthonous	1
140010	0to4	2017-08-22	M	opened	1
140010	0to4	2017-08-28	F	autochthonous	2
140010	0to4	2017-08-31	M	autochthonous	1
140010	0to4	2017-09-01	F	autochthonous	1
140010	0to4	2017-09-01	M	opened	1
140010	0to4	2017-09-14	M	autochthonous	1
140010	0to4	2017-09-17	F	autochthonous	1
140010	0to4	2017-09-25	M	autochthonous	1
140010	0to4	2017-10-14	F	autochthonous	1
140010	0to4	2017-10-20	M	opened	1
140010	0to4	2017-11-06	F	opened	1
140010	0to4	2018-05-01	M	opened	1
140010	0to4	2018-10-17	M	autochthonous	1
140010	0to4	2021-11-05	M	opened	1
140010	5to9	2016-11-13	F	autochthonous	1
140010	5to9	2017-02-02	M	autochthonous	1
140010	5to9	2017-02-04	M	opened	1
140010	5to9	2017-02-09	F	autochthonous	1
140010	5to9	2017-02-09	M	autochthonous	1
140010	5to9	2017-02-13	F	autochthonous	1
140010	5to9	2017-02-14	F	autochthonous	1
140010	5to9	2017-02-17	F	autochthonous	2
140010	5to9	2017-02-26	M	autochthonous	1
140010	5to9	2017-03-03	F	autochthonous	1
140010	5to9	2017-03-12	F	autochthonous	1
140010	5to9	2017-03-15	F	autochthonous	1
140010	5to9	2017-03-28	F	autochthonous	1
140010	5to9	2017-04-07	F	autochthonous	1
140010	5to9	2017-04-07	F	opened	1
140010	5to9	2017-04-12	M	autochthonous	1
140010	5to9	2017-04-13	F	autochthonous	1
140010	5to9	2017-04-16	F	autochthonous	1
140010	5to9	2017-04-24	F	autochthonous	1
140010	5to9	2017-04-25	F	autochthonous	1
140010	5to9	2017-04-25	M	opened	1
140010	5to9	2017-04-27	F	opened	1
140010	5to9	2017-04-28	F	autochthonous	1
140010	5to9	2017-04-28	M	autochthonous	1
140010	5to9	2017-05-01	M	autochthonous	1
140010	5to9	2017-05-02	F	autochthonous	1
140010	5to9	2017-05-05	M	autochthonous	1
140010	5to9	2017-05-11	M	autochthonous	1
140010	5to9	2017-05-14	M	autochthonous	1
140010	5to9	2017-05-16	M	autochthonous	1
140010	5to9	2017-05-19	F	autochthonous	1
140010	5to9	2017-05-20	M	autochthonous	2
140010	5to9	2017-05-21	F	autochthonous	1
140010	5to9	2017-05-22	F	autochthonous	1
140010	5to9	2017-05-23	F	autochthonous	1
140010	5to9	2017-05-23	M	autochthonous	2
140010	5to9	2017-05-24	F	autochthonous	2
140010	5to9	2017-05-24	M	opened	1
140010	5to9	2017-05-27	M	autochthonous	1
140010	5to9	2017-05-27	M	opened	1
140010	5to9	2017-05-28	M	autochthonous	1
140010	5to9	2017-05-30	F	autochthonous	1
140010	5to9	2017-05-31	F	autochthonous	1
140010	5to9	2017-06-01	M	opened	1
140010	5to9	2017-06-03	F	autochthonous	2
140010	5to9	2017-06-03	F	opened	1
140010	5to9	2017-06-05	F	autochthonous	1
140010	5to9	2017-06-06	F	autochthonous	1
140010	5to9	2017-06-08	M	autochthonous	1
140010	5to9	2017-06-09	F	autochthonous	1
140010	5to9	2017-06-10	F	autochthonous	1
140010	5to9	2017-06-10	M	autochthonous	1
140010	5to9	2017-06-11	F	autochthonous	1
140010	5to9	2017-06-13	F	autochthonous	1
140010	5to9	2017-06-13	M	autochthonous	2
140010	5to9	2017-06-15	F	autochthonous	1
140010	5to9	2017-06-16	F	autochthonous	1
140010	5to9	2017-06-16	F	opened	1
140010	5to9	2017-06-19	M	autochthonous	1
140010	5to9	2017-06-20	M	autochthonous	2
140010	5to9	2017-06-23	M	autochthonous	1
140010	5to9	2017-06-25	M	autochthonous	2
140010	5to9	2017-06-26	M	autochthonous	1
140010	5to9	2017-06-27	F	autochthonous	1
140010	5to9	2017-06-29	M	autochthonous	1
140010	5to9	2017-06-30	F	autochthonous	1
140010	5to9	2017-07-01	M	opened	1
140010	5to9	2017-07-03	F	autochthonous	2
140010	5to9	2017-07-04	F	autochthonous	1
140010	5to9	2017-07-06	M	autochthonous	1
140010	5to9	2017-07-07	M	autochthonous	1
140010	5to9	2017-07-08	F	autochthonous	1
140010	5to9	2017-07-08	M	autochthonous	1
140010	5to9	2017-07-09	F	autochthonous	2
140010	5to9	2017-07-09	F	opened	2
140010	5to9	2017-07-09	M	autochthonous	1
140010	5to9	2017-07-10	F	opened	1
140010	5to9	2017-07-10	M	opened	1
140010	5to9	2017-07-12	F	autochthonous	4
140010	5to9	2017-07-13	F	autochthonous	1
140010	5to9	2017-07-13	M	autochthonous	2
140010	5to9	2017-07-14	F	opened	1
140010	5to9	2017-07-14	M	opened	2
140010	5to9	2017-07-16	M	opened	1
140010	5to9	2017-07-17	F	autochthonous	1
140010	5to9	2017-07-17	M	autochthonous	2
140010	5to9	2017-07-18	F	opened	2
140010	5to9	2017-07-18	M	autochthonous	1
140010	5to9	2017-07-19	F	autochthonous	4
140010	5to9	2017-07-19	M	autochthonous	1
140010	5to9	2017-07-20	F	autochthonous	2
140010	5to9	2017-07-20	M	autochthonous	2
140010	5to9	2017-07-21	F	autochthonous	1
140010	5to9	2017-07-21	M	autochthonous	1
140010	5to9	2017-07-21	M	opened	1
140010	5to9	2017-07-22	F	autochthonous	4
140010	5to9	2017-07-23	M	autochthonous	2
140010	5to9	2017-07-23	M	opened	1
140010	5to9	2017-07-24	F	autochthonous	1
140010	5to9	2017-07-24	F	opened	1
140010	5to9	2017-07-24	M	autochthonous	1
140010	5to9	2017-07-25	F	autochthonous	2
140010	5to9	2017-07-26	M	autochthonous	1
140010	5to9	2017-07-26	M	opened	1
140010	5to9	2017-07-27	F	autochthonous	2
140010	5to9	2017-07-28	F	autochthonous	1
140010	5to9	2017-07-29	F	autochthonous	2
140010	5to9	2017-07-29	F	opened	1
140010	5to9	2017-07-29	M	opened	1
140010	5to9	2017-07-30	F	autochthonous	1
140010	5to9	2017-07-31	M	opened	1
140010	5to9	2017-08-01	F	autochthonous	1
140010	5to9	2017-08-01	M	autochthonous	2
140010	5to9	2017-08-02	F	autochthonous	1
140010	5to9	2017-08-03	F	autochthonous	3
140010	5to9	2017-08-03	M	autochthonous	1
140010	5to9	2017-08-05	F	autochthonous	1
140010	5to9	2017-08-05	M	autochthonous	1
140010	5to9	2017-08-05	M	opened	1
140010	5to9	2017-08-06	F	opened	1
140010	5to9	2017-08-06	M	opened	2
140010	5to9	2017-08-07	F	autochthonous	3
140010	5to9	2017-08-07	M	autochthonous	1
140010	5to9	2017-08-08	F	autochthonous	1
140010	5to9	2017-08-08	M	autochthonous	1
140010	5to9	2017-08-08	M	opened	1
140010	5to9	2017-08-09	F	autochthonous	1
140010	5to9	2017-08-09	F	opened	1
140010	5to9	2017-08-09	M	autochthonous	2
140010	5to9	2017-08-10	M	opened	1
140010	5to9	2017-08-11	F	autochthonous	1
140010	5to9	2017-08-11	M	autochthonous	1
140010	5to9	2017-08-12	F	autochthonous	1
140010	5to9	2017-08-12	M	opened	1
140010	5to9	2017-08-13	F	autochthonous	1
140010	5to9	2017-08-13	M	autochthonous	1
140010	5to9	2017-08-14	M	autochthonous	1
140010	5to9	2017-08-15	M	autochthonous	1
140010	5to9	2017-08-15	M	opened	1
140010	5to9	2017-08-16	F	autochthonous	1
140010	5to9	2017-08-16	M	autochthonous	1
140010	5to9	2017-08-16	M	opened	1
140010	5to9	2017-08-19	F	autochthonous	1
140010	5to9	2017-08-21	F	autochthonous	1
140010	5to9	2017-08-29	M	autochthonous	1
140010	5to9	2017-09-05	F	autochthonous	1
140010	5to9	2017-09-26	M	opened	1
140010	5to9	2017-10-04	M	autochthonous	1
140010	5to9	2017-10-21	F	autochthonous	1
140010	5to9	2017-10-23	F	opened	1
140010	5to9	2021-08-26	F	opened	1
140010	10to14	2016-03-14	F	autochthonous	1
140010	10to14	2017-01-08	F	opened	1
140010	10to14	2017-02-10	M	opened	1
140010	10to14	2017-02-23	F	autochthonous	1
140010	10to14	2017-03-06	F	autochthonous	1
140010	10to14	2017-03-08	M	autochthonous	1
140010	10to14	2017-03-10	F	opened	1
140010	10to14	2017-03-12	M	autochthonous	1
140010	10to14	2017-03-19	F	autochthonous	1
140010	10to14	2017-04-03	F	autochthonous	1
140010	10to14	2017-04-03	M	autochthonous	1
140010	10to14	2017-04-05	M	autochthonous	1
140010	10to14	2017-04-07	F	autochthonous	1
140010	10to14	2017-04-07	M	autochthonous	1
140010	10to14	2017-04-08	M	autochthonous	1
140010	10to14	2017-04-09	M	autochthonous	1
140010	10to14	2017-04-11	F	autochthonous	1
140010	10to14	2017-04-11	M	autochthonous	1
140010	10to14	2017-04-12	F	autochthonous	1
140010	10to14	2017-04-20	M	autochthonous	1
140010	10to14	2017-05-01	F	autochthonous	1
140010	10to14	2017-05-01	M	autochthonous	2
140010	10to14	2017-05-04	F	autochthonous	1
140010	10to14	2017-05-04	M	autochthonous	1
140010	10to14	2017-05-06	M	autochthonous	1
140010	10to14	2017-05-07	M	autochthonous	1
140010	10to14	2017-05-09	F	autochthonous	1
140010	10to14	2017-05-10	F	autochthonous	1
140010	10to14	2017-05-12	F	autochthonous	1
140010	10to14	2017-05-12	M	autochthonous	1
140010	10to14	2017-05-12	M	opened	1
140010	10to14	2017-05-13	F	autochthonous	2
140010	10to14	2017-05-14	F	autochthonous	1
140010	10to14	2017-05-14	M	opened	1
140010	10to14	2017-05-15	F	autochthonous	1
140010	10to14	2017-05-16	F	autochthonous	1
140010	10to14	2017-05-16	M	autochthonous	1
140010	10to14	2017-05-17	F	autochthonous	1
140010	10to14	2017-05-17	M	autochthonous	1
140010	10to14	2017-05-18	F	autochthonous	2
140010	10to14	2017-05-21	M	autochthonous	2
140010	10to14	2017-05-22	F	autochthonous	4
140010	10to14	2017-05-22	M	autochthonous	2
140010	10to14	2017-05-23	F	autochthonous	1
140010	10to14	2017-05-23	M	autochthonous	2
140010	10to14	2017-05-24	F	opened	1
140010	10to14	2017-05-24	M	autochthonous	1
140010	10to14	2017-05-24	M	opened	3
140010	10to14	2017-05-25	F	autochthonous	2
140010	10to14	2017-05-25	F	opened	1
140010	10to14	2017-05-25	M	autochthonous	1
140010	10to14	2017-05-26	M	autochthonous	2
140010	10to14	2017-05-27	F	opened	1
140010	10to14	2017-05-27	M	opened	1
140010	10to14	2017-05-28	F	autochthonous	1
140010	10to14	2017-05-28	F	opened	1
140010	10to14	2017-05-29	F	autochthonous	1
140010	10to14	2017-05-29	M	opened	1
140010	10to14	2017-05-31	F	opened	1
140010	10to14	2017-05-31	M	autochthonous	2
140010	10to14	2017-06-01	F	autochthonous	1
140010	10to14	2017-06-01	M	autochthonous	1
140010	10to14	2017-06-02	F	opened	1
140010	10to14	2017-06-02	M	autochthonous	1
140010	10to14	2017-06-02	M	opened	2
140010	10to14	2017-06-03	M	autochthonous	1
140010	10to14	2017-06-04	F	opened	1
140010	10to14	2017-06-04	M	autochthonous	1
140010	10to14	2017-06-06	M	autochthonous	2
140010	10to14	2017-06-07	M	autochthonous	1
140010	10to14	2017-06-07	M	opened	2
140010	10to14	2017-06-08	F	opened	1
140010	10to14	2017-06-09	F	autochthonous	2
140010	10to14	2017-06-10	M	autochthonous	1
140010	10to14	2017-06-13	M	autochthonous	1
140010	10to14	2017-06-13	M	opened	1
140010	10to14	2017-06-14	F	autochthonous	2
140010	10to14	2017-06-15	F	autochthonous	1
140010	10to14	2017-06-15	M	autochthonous	1
140010	10to14	2017-06-16	M	autochthonous	3
140010	10to14	2017-06-16	M	opened	1
140010	10to14	2017-06-18	F	opened	1
140010	10to14	2017-06-18	M	opened	1
140010	10to14	2017-06-19	F	autochthonous	2
140010	10to14	2017-06-19	F	opened	1
140010	10to14	2017-06-20	F	autochthonous	2
140010	10to14	2017-06-20	M	autochthonous	2
140010	10to14	2017-06-21	M	autochthonous	2
140010	10to14	2017-06-22	M	autochthonous	1
140010	10to14	2017-06-22	M	opened	1
140010	10to14	2017-06-23	F	autochthonous	2
140010	10to14	2017-06-23	F	opened	1
140010	10to14	2017-06-23	M	autochthonous	2
140010	10to14	2017-06-25	F	autochthonous	1
140010	10to14	2017-06-26	F	autochthonous	2
140010	10to14	2017-06-27	F	autochthonous	1
140010	10to14	2017-06-27	M	opened	2
140010	10to14	2017-06-29	M	autochthonous	1
140010	10to14	2017-06-30	M	autochthonous	2
140010	10to14	2017-07-01	M	autochthonous	1
140010	10to14	2017-07-02	F	autochthonous	1
140010	10to14	2017-07-02	M	autochthonous	2
140010	10to14	2017-07-03	F	autochthonous	4
140010	10to14	2017-07-03	M	autochthonous	1
140010	10to14	2017-07-03	M	opened	2
140010	10to14	2017-07-04	F	opened	1
140010	10to14	2017-07-04	M	autochthonous	2
[truncated: 363,422+ more rows]

## Sheet: Table S1c - Zika
ID_MN_RESI	FxEt	data	Sexo	Classification	n
110001	10to14	2015-11-16	M	autochthonous	1
110001	20to29	2019-09-30	F	autochthonous	1
110002	0to4	2016-12-30	M	autochthonous	1
110002	0to4	2020-04-04	F	autochthonous	1
110002	5to9	2019-11-09	F	autochthonous	1
110002	10to14	2019-07-05	F	autochthonous	1
110002	10to14	2020-01-23	M	autochthonous	1
110002	15to19	2016-05-01	F	autochthonous	2
110002	15to19	2016-10-19	F	autochthonous	1
110002	15to19	2020-01-11	M	autochthonous	1
110002	15to19	2020-01-24	F	autochthonous	1
110002	15to19	2020-02-20	F	autochthonous	1
110002	20to29	2016-04-20	F	autochthonous	1
110002	20to29	2016-05-03	F	autochthonous	1
110002	20to29	2016-05-05	F	autochthonous	1
110002	20to29	2016-05-09	F	autochthonous	1
110002	20to29	2016-05-21	F	autochthonous	1
110002	20to29	2016-07-30	F	autochthonous	1
110002	20to29	2016-12-14	F	autochthonous	1
110002	20to29	2017-01-06	F	autochthonous	1
110002	20to29	2019-11-29	M	autochthonous	1
110002	20to29	2019-12-11	M	autochthonous	1
110002	20to29	2020-02-20	F	autochthonous	1
110002	20to29	2020-04-27	F	autochthonous	1
110002	20to29	2021-12-28	F	autochthonous	1
110002	30to39	2016-03-01	F	autochthonous	1
110002	30to39	2016-09-20	F	autochthonous	1
110002	30to39	2017-02-20	F	autochthonous	1
110002	30to39	2019-06-08	F	autochthonous	1
110002	30to39	2019-11-17	F	autochthonous	1
110002	30to39	2020-04-20	F	autochthonous	1
110002	30to39	2020-05-06	F	autochthonous	1
110002	30to39	2021-02-25	F	autochthonous	1
110002	30to39	2021-11-13	M	autochthonous	1
110002	30to39	2021-12-21	F	autochthonous	1
110002	40to49	2020-10-28	F	autochthonous	1
110002	40to49	2021-03-01	M	autochthonous	1
110002	50to59	2020-01-11	F	autochthonous	1
110002	50to59	2020-11-21	F	autochthonous	1
110002	60to69	2020-01-31	M	autochthonous	1
110002	60to69	2020-03-24	F	autochthonous	1
110002	60to69	2020-04-24	F	autochthonous	1
110003	40to49	2019-06-20	M	autochthonous	1
110004	0to4	2016-06-04	M	autochthonous	1
110004	0to4	2019-04-08	M	autochthonous	1
110004	0to4	2019-09-24	M	autochthonous	1
110004	0to4	2020-02-11	M	autochthonous	1
110004	5to9	2019-01-22	F	autochthonous	1
110004	10to14	2019-10-09	F	autochthonous	1
110004	10to14	2021-05-09	F	autochthonous	1
110004	15to19	2019-10-12	F	autochthonous	1
110004	20to29	2016-04-20	F	autochthonous	1
110004	20to29	2017-04-30	F	autochthonous	1
110004	20to29	2019-05-26	F	autochthonous	1
110004	20to29	2019-09-23	F	autochthonous	1
110004	30to39	2021-04-04	F	autochthonous	1
110004	30to39	2021-05-10	F	autochthonous	1
110004	40to49	2020-02-15	F	autochthonous	1
110004	50to59	2020-12-19	M	autochthonous	1
110005	0to4	2016-02-12	M	autochthonous	1
110005	0to4	2016-02-14	F	autochthonous	1
110005	0to4	2020-05-03	F	autochthonous	1
110005	5to9	2016-02-16	F	autochthonous	1
110005	10to14	2016-03-10	F	autochthonous	1
110005	15to19	2016-02-17	F	autochthonous	1
110005	15to19	2016-03-08	F	autochthonous	1
110005	15to19	2016-03-14	M	autochthonous	1
110005	20to29	2016-01-29	F	autochthonous	1
110005	20to29	2016-02-16	M	autochthonous	1
110005	20to29	2016-02-17	F	autochthonous	1
110005	20to29	2016-02-18	M	autochthonous	1
110005	20to29	2016-02-19	F	autochthonous	1
110005	20to29	2016-03-01	M	autochthonous	1
110005	20to29	2016-03-17	F	autochthonous	1
110005	20to29	2016-04-08	F	autochthonous	1
110005	20to29	2016-04-09	F	autochthonous	1
110005	20to29	2020-02-04	F	autochthonous	1
110005	20to29	2020-03-25	F	autochthonous	1
110005	30to39	2016-02-25	F	autochthonous	1
110005	40to49	2016-02-14	F	autochthonous	1
110005	40to49	2016-02-17	F	autochthonous	1
110005	40to49	2016-02-21	F	autochthonous	1
110005	40to49	2016-03-01	F	autochthonous	1
110005	50to59	2020-03-17	M	autochthonous	1
110005	60to69	2020-01-15	M	autochthonous	1
110006	0to4	2016-05-11	M	autochthonous	1
110006	20to29	2016-05-01	F	autochthonous	1
110006	20to29	2018-01-02	F	autochthonous	1
110006	20to29	2018-10-19	F	autochthonous	1
110006	40to49	2020-05-12	M	autochthonous	1
110009	0to4	2016-05-20	M	autochthonous	1
110009	0to4	2016-06-24	F	autochthonous	1
110009	15to19	2016-04-30	F	autochthonous	1
110009	15to19	2016-06-28	F	autochthonous	1
110009	15to19	2017-12-29	F	autochthonous	1
110009	15to19	2018-12-09	M	autochthonous	1
110009	20to29	2016-05-16	F	autochthonous	1
110009	30to39	2016-05-03	F	autochthonous	1
110010	5to9	2016-05-06	F	Undetermined	1
110010	30to39	2016-03-30	F	Undetermined	1
110010	30to39	2016-04-01	F	autochthonous	1
110011	0to4	2017-03-09	F	autochthonous	1
110011	0to4	2020-01-10	F	autochthonous	1
110011	20to29	2017-01-23	F	autochthonous	1
110011	20to29	2017-02-07	F	autochthonous	1
110011	60to69	2019-11-29	F	Undetermined	1
110011	70to79	2017-02-15	F	autochthonous	1
110012	0to4	2017-05-01	F	autochthonous	1
110012	0to4	2018-01-12	F	autochthonous	1
110012	0to4	2018-01-22	M	autochthonous	1
110012	0to4	2021-08-01	F	autochthonous	1
110012	5to9	2017-04-03	F	autochthonous	1
110012	5to9	2018-10-24	M	autochthonous	1
110012	5to9	2021-11-29	F	autochthonous	1
110012	10to14	2016-06-03	M	autochthonous	1
110012	10to14	2016-10-05	M	autochthonous	1
110012	10to14	2017-04-24	F	autochthonous	1
110012	10to14	2018-10-22	F	autochthonous	1
110012	10to14	2020-10-30	M	autochthonous	1
110012	15to19	2016-06-23	F	autochthonous	1
110012	15to19	2016-12-23	F	autochthonous	1
110012	15to19	2017-08-03	F	autochthonous	1
110012	20to29	2016-04-02	M	autochthonous	1
110012	20to29	2016-04-11	F	autochthonous	1
110012	20to29	2016-11-05	F	autochthonous	1
110012	20to29	2016-11-14	M	autochthonous	1
110012	20to29	2016-12-12	F	autochthonous	1
110012	20to29	2017-08-05	F	autochthonous	1
110012	20to29	2017-08-25	M	autochthonous	1
110012	20to29	2019-08-08	F	Undetermined	1
110012	20to29	2021-03-25	F	autochthonous	2
110012	20to29	2021-06-16	F	autochthonous	2
110012	20to29	2021-08-01	F	autochthonous	1
110012	30to39	2016-02-07	F	Undetermined	1
110012	30to39	2016-03-22	F	Undetermined	1
110012	30to39	2016-07-01	F	autochthonous	1
110012	30to39	2017-01-25	F	autochthonous	1
110012	30to39	2018-10-31	M	autochthonous	1
110012	30to39	2018-11-01	F	autochthonous	1
110012	30to39	2019-10-04	F	autochthonous	1
110012	30to39	2021-04-25	M	autochthonous	1
110012	30to39	2021-05-08	F	autochthonous	2
110012	40to49	2017-05-24	M	autochthonous	1
110012	40to49	2017-08-14	F	autochthonous	1
110012	40to49	2018-07-03	F	autochthonous	1
110012	40to49	2021-03-20	M	autochthonous	1
110012	40to49	2021-05-17	M	autochthonous	2
110012	40to49	2021-05-23	F	autochthonous	2
110012	50to59	2017-05-22	F	autochthonous	1
110012	60to69	2018-02-06	M	autochthonous	1
110012	60to69	2021-10-04	F	autochthonous	1
110013	20to29	2021-09-04	M	autochthonous	1
110014	0to4	2019-04-07	M	autochthonous	1
110015	0to4	2019-09-13	F	autochthonous	1
110015	30to39	2017-06-17	M	autochthonous	1
110015	40to49	2019-05-04	F	autochthonous	1
110015	40to49	2019-10-22	F	autochthonous	1
110015	50to59	2019-02-15	F	autochthonous	1
110018	0to4	2016-05-16	F	autochthonous	1
110018	0to4	2016-05-30	M	autochthonous	1
110018	0to4	2018-04-03	M	autochthonous	1
110018	5to9	2018-03-30	M	autochthonous	1
110018	15to19	2016-03-02	F	autochthonous	1
110020	0to4	2016-02-13	M	autochthonous	1
110020	0to4	2016-02-29	M	autochthonous	1
110020	0to4	2016-03-27	M	autochthonous	1
110020	0to4	2016-03-29	M	autochthonous	1
110020	0to4	2016-05-07	F	autochthonous	1
110020	0to4	2016-05-09	M	autochthonous	1
110020	0to4	2016-05-13	M	autochthonous	1
110020	0to4	2016-05-20	M	autochthonous	2
110020	0to4	2016-05-21	F	autochthonous	1
110020	0to4	2016-05-24	M	autochthonous	1
110020	0to4	2016-05-31	F	autochthonous	1
110020	0to4	2016-06-03	M	autochthonous	1
110020	0to4	2016-06-08	F	autochthonous	1
110020	0to4	2016-06-20	M	autochthonous	1
110020	0to4	2016-07-15	M	autochthonous	1
110020	0to4	2016-08-30	F	autochthonous	1
110020	0to4	2017-01-20	F	autochthonous	1
110020	0to4	2017-02-08	F	autochthonous	1
110020	0to4	2017-02-23	F	autochthonous	1
110020	0to4	2017-08-21	F	autochthonous	1
110020	0to4	2018-05-25	M	autochthonous	1
110020	0to4	2019-01-14	F	autochthonous	1
110020	0to4	2019-04-02	M	autochthonous	1
110020	0to4	2019-06-09	M	autochthonous	1
110020	5to9	2016-02-13	M	autochthonous	1
110020	5to9	2016-02-15	F	autochthonous	1
110020	5to9	2016-02-15	M	autochthonous	1
110020	5to9	2016-02-18	M	autochthonous	1
110020	5to9	2016-02-19	M	autochthonous	1
110020	5to9	2016-02-21	M	autochthonous	1
110020	5to9	2016-02-28	M	autochthonous	1
110020	5to9	2016-03-16	F	autochthonous	1
110020	5to9	2016-03-31	F	autochthonous	1
110020	5to9	2016-04-05	M	autochthonous	1
110020	5to9	2016-04-07	F	autochthonous	1
110020	5to9	2016-04-08	M	autochthonous	1
110020	5to9	2016-04-23	M	autochthonous	1
110020	5to9	2016-05-12	F	autochthonous	1
110020	5to9	2016-06-09	M	autochthonous	1
110020	5to9	2016-06-13	M	autochthonous	1
110020	5to9	2016-06-21	F	autochthonous	1
110020	5to9	2016-06-21	M	autochthonous	1
110020	5to9	2016-07-09	M	autochthonous	1
110020	5to9	2017-01-11	M	autochthonous	1
110020	5to9	2017-01-28	M	autochthonous	1
110020	5to9	2017-02-05	M	autochthonous	1
110020	5to9	2017-03-04	M	autochthonous	1
110020	5to9	2017-11-07	F	autochthonous	1
110020	5to9	2020-01-31	F	autochthonous	1
110020	10to14	2016-01-04	M	autochthonous	1
110020	10to14	2016-01-20	F	autochthonous	1
110020	10to14	2016-02-15	F	autochthonous	1
110020	10to14	2016-02-18	M	autochthonous	1
110020	10to14	2016-02-21	F	autochthonous	1
110020	10to14	2016-02-29	F	autochthonous	1
110020	10to14	2016-03-10	F	autochthonous	1
110020	10to14	2016-03-14	F	autochthonous	1
110020	10to14	2016-03-15	M	autochthonous	1
110020	10to14	2016-03-22	M	autochthonous	1
110020	10to14	2016-05-16	M	autochthonous	1
110020	10to14	2016-05-31	F	autochthonous	1
110020	10to14	2016-06-01	F	autochthonous	1
110020	10to14	2016-06-07	F	autochthonous	1
110020	10to14	2016-06-07	M	autochthonous	1
110020	10to14	2016-06-20	M	autochthonous	1
110020	10to14	2016-06-22	M	autochthonous	1
110020	10to14	2016-07-09	F	autochthonous	1
110020	10to14	2016-11-14	F	autochthonous	1
110020	10to14	2017-02-24	F	autochthonous	1
110020	10to14	2017-03-04	F	autochthonous	1
110020	15to19	2016-01-27	F	autochthonous	1
110020	15to19	2016-02-05	F	autochthonous	1
110020	15to19	2016-02-07	F	autochthonous	1
110020	15to19	2016-02-13	F	autochthonous	1
110020	15to19	2016-02-15	F	autochthonous	1
110020	15to19	2016-02-17	M	autochthonous	1
110020	15to19	2016-02-25	F	autochthonous	1
110020	15to19	2016-03-12	F	autochthonous	1
110020	15to19	2016-04-29	F	autochthonous	1
110020	15to19	2016-05-01	M	autochthonous	1
110020	15to19	2016-06-09	F	autochthonous	1
110020	15to19	2016-11-16	M	autochthonous	1
110020	15to19	2017-01-28	F	autochthonous	1
110020	15to19	2017-02-06	M	autochthonous	1
110020	15to19	2017-02-15	M	autochthonous	1
110020	15to19	2017-11-18	F	autochthonous	1
110020	15to19	2019-04-29	M	autochthonous	1
110020	15to19	2019-06-13	M	autochthonous	1
110020	15to19	2019-08-24	F	autochthonous	1
110020	15to19	2020-07-29	F	autochthonous	1
110020	20to29	2015-12-15	F	autochthonous	1
110020	20to29	2016-01-24	F	autochthonous	1
110020	20to29	2016-01-27	F	autochthonous	1
110020	20to29	2016-01-27	M	autochthonous	1
110020	20to29	2016-01-31	M	autochthonous	1
110020	20to29	2016-02-01	F	autochthonous	1
110020	20to29	2016-02-08	F	autochthonous	1
110020	20to29	2016-02-10	F	autochthonous	1
110020	20to29	2016-02-12	F	autochthonous	1
110020	20to29	2016-02-15	F	autochthonous	1
110020	20to29	2016-02-19	F	autochthonous	3
110020	20to29	2016-02-20	F	autochthonous	1
110020	20to29	2016-02-22	F	autochthonous	1
110020	20to29	2016-02-23	F	autochthonous	1
110020	20to29	2016-02-25	F	autochthonous	1
110020	20to29	2016-03-03	F	autochthonous	1
110020	20to29	2016-03-04	F	autochthonous	1
110020	20to29	2016-03-07	M	autochthonous	1
110020	20to29	2016-03-10	F	autochthonous	1
110020	20to29	2016-03-14	F	autochthonous	1
110020	20to29	2016-03-17	F	autochthonous	1
110020	20to29	2016-03-27	F	autochthonous	2
110020	20to29	2016-04-02	F	autochthonous	1
110020	20to29	2016-04-20	F	autochthonous	1
110020	20to29	2016-04-23	F	autochthonous	1
110020	20to29	2016-04-27	F	autochthonous	1
110020	20to29	2016-05-06	F	autochthonous	1
110020	20to29	2016-05-06	M	autochthonous	1
110020	20to29	2016-05-09	F	autochthonous	1
110020	20to29	2016-05-10	F	autochthonous	1
110020	20to29	2016-05-13	F	autochthonous	1
110020	20to29	2016-05-14	F	autochthonous	1
110020	20to29	2016-05-18	F	autochthonous	1
110020	20to29	2016-05-19	F	autochthonous	1
110020	20to29	2016-05-22	F	autochthonous	1
110020	20to29	2016-06-05	F	autochthonous	1
110020	20to29	2016-06-11	F	autochthonous	1
110020	20to29	2016-06-16	F	autochthonous	1
110020	20to29	2016-07-17	M	autochthonous	1
110020	20to29	2016-10-13	F	autochthonous	1
110020	20to29	2016-11-22	F	autochthonous	1
110020	20to29	2016-12-04	F	autochthonous	1
110020	20to29	2017-01-28	F	autochthonous	1
110020	20to29	2017-01-30	F	autochthonous	1
110020	20to29	2017-02-01	F	autochthonous	1
110020	20to29	2017-02-07	F	autochthonous	1
110020	20to29	2017-11-25	F	autochthonous	1
110020	20to29	2018-01-22	F	autochthonous	1
110020	20to29	2018-09-04	M	autochthonous	1
110020	20to29	2018-11-28	M	autochthonous	1
110020	20to29	2019-01-14	F	autochthonous	1
110020	20to29	2019-06-20	M	autochthonous	1
110020	20to29	2019-11-03	F	autochthonous	1
110020	20to29	2020-01-30	F	autochthonous	1
110020	20to29	2020-02-12	M	autochthonous	1
110020	20to29	2020-02-24	F	autochthonous	1
110020	20to29	2020-11-18	M	autochthonous	1
110020	30to39	2016-01-05	F	autochthonous	1
110020	30to39	2016-01-09	M	autochthonous	1
110020	30to39	2016-01-11	M	autochthonous	1
110020	30to39	2016-01-13	F	autochthonous	1
110020	30to39	2016-01-17	F	autochthonous	1
110020	30to39	2016-01-18	F	autochthonous	1
110020	30to39	2016-02-04	F	autochthonous	1
110020	30to39	2016-02-08	F	autochthonous	2
110020	30to39	2016-02-09	F	autochthonous	1
110020	30to39	2016-02-10	M	autochthonous	1
110020	30to39	2016-02-15	M	autochthonous	1
110020	30to39	2016-02-17	F	autochthonous	2
110020	30to39	2016-02-17	M	autochthonous	2
110020	30to39	2016-02-18	F	autochthonous	1
110020	30to39	2016-02-19	M	autochthonous	1
110020	30to39	2016-02-21	M	autochthonous	1
110020	30to39	2016-02-26	M	autochthonous	1
110020	30to39	2016-02-27	F	autochthonous	2
110020	30to39	2016-02-29	F	autochthonous	1
110020	30to39	2016-03-02	M	autochthonous	1
110020	30to39	2016-03-06	F	autochthonous	1
110020	30to39	2016-03-08	F	autochthonous	1
110020	30to39	2016-03-11	F	autochthonous	2
110020	30to39	2016-03-15	F	autochthonous	1
110020	30to39	2016-03-19	F	autochthonous	1
110020	30to39	2016-03-30	M	autochthonous	1
110020	30to39	2016-04-18	M	autochthonous	1
110020	30to39	2016-04-20	F	autochthonous	1
110020	30to39	2016-04-23	F	autochthonous	1
110020	30to39	2016-05-04	F	autochthonous	1
110020	30to39	2016-05-05	F	autochthonous	1
110020	30to39	2016-05-07	F	autochthonous	1
110020	30to39	2016-05-14	F	autochthonous	1
110020	30to39	2016-05-18	F	autochthonous	1
110020	30to39	2016-05-22	F	autochthonous	1
110020	30to39	2016-05-23	F	autochthonous	1
110020	30to39	2016-05-26	F	autochthonous	1
110020	30to39	2016-05-27	F	autochthonous	2
110020	30to39	2016-06-29	M	autochthonous	1
110020	30to39	2016-08-09	F	autochthonous	1
110020	30to39	2016-12-18	M	autochthonous	1
110020	30to39	2017-01-06	F	autochthonous	1
110020	30to39	2017-01-12	F	autochthonous	1
110020	30to39	2017-01-16	F	autochthonous	1
110020	30to39	2017-01-17	F	autochthonous	1
110020	30to39	2017-01-22	F	autochthonous	2
110020	30to39	2017-01-25	F	autochthonous	1
110020	30to39	2017-01-26	M	autochthonous	1
110020	30to39	2017-01-27	F	autochthonous	1
110020	30to39	2017-02-01	F	autochthonous	1
110020	30to39	2017-02-06	F	autochthonous	1
110020	30to39	2017-03-24	F	autochthonous	1
110020	30to39	2017-03-27	F	autochthonous	1
110020	30to39	2017-04-20	F	autochthonous	1
110020	30to39	2017-05-11	F	autochthonous	1
110020	30to39	2018-04-16	F	autochthonous	1
110020	30to39	2019-01-14	M	autochthonous	1
110020	30to39	2019-04-14	M	autochthonous	1
110020	30to39	2019-06-30	M	autochthonous	1
110020	30to39	2019-10-24	M	autochthonous	1
110020	30to39	2020-01-07	F	autochthonous	1
110020	30to39	2020-01-28	M	autochthonous	1
110020	30to39	2020-02-02	M	autochthonous	1
110020	30to39	2020-02-04	F	Undetermined	1
110020	30to39	2020-09-30	M	autochthonous	1
110020	30to39	2021-01-02	F	autochthonous	1
110020	30to39	2021-08-01	F	autochthonous	1
110020	40to49	2016-01-08	F	autochthonous	1
110020	40to49	2016-01-08	M	autochthonous	1
110020	40to49	2016-01-29	M	autochthonous	1
110020	40to49	2016-02-05	M	autochthonous	1
110020	40to49	2016-02-10	F	autochthonous	1
110020	40to49	2016-02-13	M	autochthonous	1
110020	40to49	2016-02-16	F	autochthonous	1
110020	40to49	2016-02-21	F	autochthonous	1
110020	40to49	2016-02-22	F	autochthonous	1
110020	40to49	2016-02-29	M	autochthonous	1
110020	40to49	2016-03-08	M	autochthonous	1
110020	40to49	2016-03-13	M	autochthonous	1
110020	40to49	2016-03-22	F	autochthonous	1
110020	40to49	2016-03-29	F	autochthonous	1
110020	40to49	2016-04-18	M	autochthonous	1
110020	40to49	2016-04-24	F	autochthonous	1
110020	40to49	2016-06-15	F	autochthonous	1
110020	40to49	2016-06-20	M	autochthonous	1
110020	40to49	2016-10-19	F	autochthonous	1
110020	40to49	2017-01-13	F	autochthonous	1
110020	40to49	2017-02-06	M	autochthonous	2
110020	40to49	2017-02-10	M	autochthonous	1
110020	40to49	2017-04-04	F	autochthonous	1
110020	40to49	2017-09-15	M	autochthonous	1
110020	40to49	2018-04-10	F	autochthonous	1
110020	40to49	2019-02-06	F	autochthonous	1
110020	40to49	2019-04-08	F	autochthonous	1
110020	40to49	2019-07-02	F	autochthonous	1
110020	40to49	2019-10-24	F	autochthonous	1
110020	40to49	2019-11-18	F	autochthonous	1
110020	40to49	2020-01-22	M	autochthonous	1
110020	40to49	2020-01-27	M	autochthonous	1
110020	40to49	2020-02-10	F	autochthonous	1
110020	50to59	2016-01-05	M	autochthonous	1
110020	50to59	2016-01-25	M	autochthonous	1
110020	50to59	2016-02-08	F	autochthonous	1
110020	50to59	2016-02-10	M	autochthonous	1
110020	50to59	2016-02-14	F	autochthonous	1
110020	50to59	2016-03-10	F	autochthonous	2
110020	50to59	2016-03-28	F	autochthonous	1
110020	50to59	2016-05-04	F	autochthonous	1
110020	50to59	2016-06-07	F	autochthonous	1
110020	50to59	2016-07-12	F	autochthonous	1
110020	50to59	2017-01-06	M	autochthonous	1
110020	50to59	2017-01-09	F	autochthonous	1
110020	50to59	2019-03-18	M	autochthonous	1
110020	50to59	2020-11-27	F	autochthonous	1
110020	50to59	2021-03-30	F	autochthonous	1
110020	50to59	2021-04-10	F	autochthonous	1
110020	60to69	2016-01-25	M	autochthonous	1
110020	60to69	2016-02-13	M	autochthonous	1
110020	60to69	2016-03-09	M	autochthonous	1
110020	60to69	2016-11-25	F	autochthonous	1
110020	60to69	2019-05-02	M	autochthonous	1
110020	60to69	2019-10-21	M	autochthonous	1
110020	60to69	2020-02-21	F	autochthonous	1
110020	70to79	2017-01-10	F	autochthonous	1
110020	70to79	2020-02-06	F	autochthonous	1
110020	70to79	2021-05-01	M	autochthonous	1
110020	70to79	2021-05-10	F	autochthonous	1
110020	>= 80	2020-02-06	M	autochthonous	1
110020	>= 80	2020-02-13	M	autochthonous	1
110025	0to4	2019-10-21	M	Undetermined	1
110025	5to9	2019-07-19	M	autochthonous	1
110025	15to19	2021-03-10	F	autochthonous	1
110025	20to29	2020-02-10	F	autochthonous	1
110025	20to29	2021-03-22	M	autochthonous	1
110025	20to29	2021-04-01	M	autochthonous	1
110025	30to39	2016-05-08	F	Undetermined	1
110025	30to39	2019-09-27	F	Undetermined	1
110025	30to39	2021-03-18	F	autochthonous	1
110025	30to39	2021-03-20	F	autochthonous	1
110025	30to39	2021-04-06	M	autochthonous	1
110025	30to39	2021-04-16	F	autochthonous	1
110025	30to39	2021-10-04	M	autochthonous	1
110025	40to49	2019-07-22	F	autochthonous	1
110025	40to49	2021-03-05	F	Undetermined	1
110025	40to49	2021-05-31	F	autochthonous	1
110025	40to49	2021-07-16	M	autochthonous	1
110025	50to59	2020-04-29	F	autochthonous	1
110025	50to59	2021-03-27	F	autochthonous	1
110025	50to59	2021-05-10	F	autochthonous	1
110025	50to59	2021-10-10	M	autochthonous	1
110025	60to69	2021-04-20	F	autochthonous	1
110025	>= 80	2019-10-18	M	Undetermined	1
110025	>= 80	2019-10-23	M	Undetermined	1
110028	20to29	2016-01-23	F	autochthonous	1
110028	20to29	2016-02-17	F	autochthonous	1
110028	20to29	2016-03-13	F	autochthonous	1
110028	20to29	2016-04-25	F	autochthonous	1
110028	20to29	2019-01-09	F	autochthonous	1
110029	0to4	2016-05-21	F	autochthonous	1
110029	20to29	2016-03-01	F	autochthonous	1
110030	0to4	2016-02-20	F	autochthonous	1
110030	0to4	2016-02-29	M	autochthonous	2
110030	0to4	2016-03-08	F	autochthonous	1
110030	0to4	2016-03-14	M	autochthonous	1
110030	0to4	2016-03-27	M	autochthonous	2
110030	0to4	2016-03-29	M	autochthonous	1
110030	0to4	2016-04-01	M	autochthonous	1
110030	0to4	2016-04-03	F	autochthonous	1
110030	0to4	2016-04-10	F	autochthonous	2
110030	0to4	2016-05-01	M	autochthonous	1
110030	0to4	2016-05-04	F	autochthonous	1
110030	0to4	2016-05-11	F	autochthonous	1
110030	0to4	2016-06-04	M	autochthonous	1
110030	0to4	2016-06-06	M	autochthonous	1
110030	0to4	2017-08-05	F	autochthonous	1
110030	0to4	2017-08-16	F	autochthonous	1
110030	0to4	2018-05-07	M	autochthonous	1
110030	0to4	2020-01-08	F	Undetermined	1
110030	0to4	2020-03-15	M	autochthonous	1
110030	5to9	2016-02-13	F	autochthonous	1
110030	5to9	2016-02-13	M	autochthonous	2
110030	5to9	2016-02-14	M	autochthonous	1
110030	5to9	2016-02-29	F	autochthonous	1
110030	5to9	2016-03-01	F	autochthonous	1
110030	5to9	2016-03-03	F	autochthonous	1
110030	5to9	2016-03-07	F	autochthonous	1
110030	5to9	2016-03-11	M	autochthonous	1
110030	5to9	2016-03-21	M	autochthonous	1
110030	5to9	2016-03-22	F	autochthonous	1
110030	5to9	2016-03-26	F	autochthonous	1
110030	5to9	2016-03-28	F	autochthonous	1
110030	5to9	2016-03-30	F	autochthonous	1
110030	5to9	2016-04-08	M	autochthonous	1
110030	5to9	2016-04-16	F	autochthonous	1
110030	5to9	2016-04-24	M	autochthonous	1
110030	5to9	2016-05-11	F	autochthonous	1
110030	5to9	2020-01-28	F	autochthonous	1
110030	5to9	2020-02-28	M	autochthonous	1
110030	5to9	2020-03-29	F	autochthonous	1
110030	10to14	2016-02-15	F	autochthonous	1
110030	10to14	2016-02-18	M	autochthonous	1
110030	10to14	2016-02-27	F	autochthonous	1
110030	10to14	2016-03-07	M	autochthonous	1
110030	10to14	2016-03-08	F	autochthonous	1
110030	10to14	2016-03-09	F	autochthonous	1
110030	10to14	2016-03-09	M	autochthonous	2
110030	10to14	2016-03-29	F	autochthonous	1
110030	10to14	2016-03-29	M	autochthonous	1
110030	10to14	2016-03-30	F	autochthonous	2
110030	10to14	2016-04-02	M	autochthonous	1
110030	10to14	2016-04-07	F	autochthonous	1
110030	10to14	2016-04-07	M	autochthonous	1
110030	10to14	2016-04-10	M	autochthonous	2
110030	10to14	2016-04-11	F	autochthonous	1
110030	10to14	2016-04-23	F	autochthonous	1
110030	10to14	2016-05-01	M	autochthonous	1
110030	10to14	2016-05-22	F	autochthonous	1
110030	10to14	2016-05-27	F	autochthonous	1
110030	10to14	2017-12-06	M	autochthonous	1
110030	10to14	2019-05-31	F	autochthonous	1
110030	10to14	2020-01-02	M	autochthonous	1
110030	10to14	2020-02-16	F	autochthonous	1
110030	10to14	2020-06-02	M	autochthonous	1
110030	15to19	2016-01-10	F	autochthonous	1
110030	15to19	2016-02-13	F	autochthonous	1
110030	15to19	2016-02-27	M	autochthonous	1
110030	15to19	2016-02-28	F	autochthonous	1
110030	15to19	2016-03-06	F	autochthonous	1
110030	15to19	2016-03-06	M	autochthonous	1
110030	15to19	2016-03-08	F	autochthonous	1
110030	15to19	2016-03-13	M	autochthonous	1
110030	15to19	2016-03-14	M	autochthonous	1
110030	15to19	2016-03-20	F	autochthonous	1
110030	15to19	2016-03-25	F	autochthonous	1
110030	15to19	2016-03-25	M	autochthonous	1
110030	15to19	2016-03-28	M	autochthonous	1
110030	15to19	2016-03-29	F	autochthonous	1
110030	15to19	2016-03-30	F	autochthonous	1
110030	15to19	2016-04-06	F	autochthonous	1
110030	15to19	2016-04-14	F	autochthonous	1
110030	15to19	2016-04-16	F	autochthonous	1
110030	15to19	2016-04-17	F	autochthonous	1
110030	15to19	2016-04-23	F	autochthonous	1
110030	15to19	2016-04-27	F	autochthonous	1
110030	15to19	2016-04-28	F	autochthonous	1
110030	15to19	2016-05-05	F	autochthonous	1
110030	15to19	2016-05-18	F	autochthonous	1
110030	15to19	2016-05-19	F	autochthonous	1
110030	15to19	2016-05-20	F	autochthonous	1
110030	15to19	2016-05-30	F	autochthonous	1
110030	15to19	2016-06-06	F	autochthonous	1
110030	15to19	2017-03-19	F	autochthonous	1
110030	15to19	2017-06-23	F	autochthonous	1
110030	15to19	2017-09-24	F	autochthonous	1
110030	15to19	2020-01-30	F	autochthonous	1
110030	20to29	2015-05-23	F	Undetermined	1
110030	20to29	2016-01-13	F	autochthonous	1
110030	20to29	2016-01-31	F	autochthonous	1
110030	20to29	2016-02-08	F	autochthonous	1
110030	20to29	2016-02-09	F	autochthonous	1
110030	20to29	2016-02-09	M	autochthonous	1
110030	20to29	2016-02-11	F	autochthonous	1
110030	20to29	2016-02-13	F	autochthonous	3
110030	20to29	2016-02-14	F	autochthonous	2
110030	20to29	2016-02-16	M	autochthonous	1
110030	20to29	2016-02-18	F	autochthonous	1
110030	20to29	2016-02-21	F	autochthonous	1
110030	20to29	2016-02-28	F	autochthonous	1
110030	20to29	2016-03-03	F	autochthonous	1
110030	20to29	2016-03-04	F	autochthonous	1
110030	20to29	2016-03-06	M	autochthonous	1
110030	20to29	2016-03-07	F	autochthonous	2
110030	20to29	2016-03-07	M	autochthonous	1
110030	20to29	2016-03-08	F	autochthonous	1
110030	20to29	2016-03-10	M	autochthonous	1
110030	20to29	2016-03-11	F	autochthonous	1
110030	20to29	2016-03-13	F	autochthonous	1
110030	20to29	2016-03-16	F	autochthonous	1
110030	20to29	2016-03-18	F	autochthonous	2
110030	20to29	2016-03-19	F	autochthonous	2
110030	20to29	2016-03-20	F	autochthonous	3
110030	20to29	2016-03-24	F	autochthonous	2
110030	20to29	2016-03-25	F	autochthonous	2
110030	20to29	2016-03-25	M	autochthonous	1
110030	20to29	2016-03-26	F	autochthonous	1
110030	20to29	2016-03-28	F	autochthonous	1
110030	20to29	2016-03-28	M	autochthonous	1
110030	20to29	2016-03-29	F	autochthonous	3
110030	20to29	2016-03-29	M	autochthonous	2
110030	20to29	2016-03-30	F	autochthonous	1
110030	20to29	2016-04-01	F	autochthonous	1
110030	20to29	2016-04-01	M	autochthonous	2
110030	20to29	2016-04-02	M	autochthonous	2
110030	20to29	2016-04-03	F	autochthonous	1
110030	20to29	2016-04-04	F	autochthonous	1
110030	20to29	2016-04-05	F	autochthonous	3
110030	20to29	2016-04-06	F	autochthonous	3
110030	20to29	2016-04-10	F	autochthonous	1
110030	20to29	2016-04-11	F	autochthonous	1
110030	20to29	2016-04-16	F	autochthonous	1
110030	20to29	2016-04-17	F	autochthonous	1
110030	20to29	2016-04-18	F	autochthonous	3
110030	20to29	2016-04-18	M	autochthonous	1
110030	20to29	2016-04-20	M	autochthonous	1
110030	20to29	2016-04-25	F	autochthonous	2
110030	20to29	2016-04-27	F	autochthonous	1
110030	20to29	2016-04-28	F	autochthonous	3
110030	20to29	2016-04-29	F	autochthonous	1
110030	20to29	2016-04-30	F	autochthonous	2
110030	20to29	2016-05-02	F	autochthonous	1
110030	20to29	2016-05-05	F	autochthonous	1
110030	20to29	2016-05-08	F	autochthonous	2
110030	20to29	2016-05-09	F	autochthonous	1
110030	20to29	2016-05-16	F	autochthonous	1
110030	20to29	2016-05-18	F	autochthonous	1
110030	20to29	2016-05-24	F	autochthonous	1
110030	20to29	2016-05-31	F	autochthonous	1
110030	20to29	2016-10-20	F	autochthonous	1
110030	20to29	2017-02-06	F	autochthonous	1
110030	20to29	2017-04-05	F	autochthonous	1
110030	20to29	2018-03-30	F	autochthonous	1
110030	20to29	2018-04-07	F	autochthonous	1
110030	20to29	2018-09-17	F	autochthonous	1
110030	20to29	2018-10-30	F	autochthonous	1
110030	20to29	2018-11-19	F	autochthonous	1
110030	20to29	2018-11-28	F	autochthonous	1
110030	20to29	2018-12-31	F	autochthonous	1
110030	20to29	2019-08-05	F	autochthonous	1
110030	20to29	2020-01-17	F	autochthonous	1
110030	20to29	2020-01-27	F	autochthonous	1
110030	20to29	2020-03-27	F	autochthonous	1
110030	30to39	2015-02-14	F	autochthonous	1
110030	30to39	2016-01-11	F	autochthonous	1
110030	30to39	2016-01-31	M	autochthonous	1
110030	30to39	2016-02-12	F	autochthonous	1
110030	30to39	2016-02-14	M	autochthonous	1
110030	30to39	2016-02-25	F	autochthonous	1
110030	30to39	2016-02-28	F	autochthonous	1
110030	30to39	2016-02-29	F	autochthonous	1
110030	30to39	2016-03-03	F	autochthonous	1
110030	30to39	2016-03-04	F	autochthonous	1
110030	30to39	2016-03-07	F	autochthonous	1
110030	30to39	2016-03-08	F	autochthonous	1
110030	30to39	2016-03-09	F	autochthonous	1
110030	30to39	2016-03-12	F	autochthonous	2
110030	30to39	2016-03-21	M	autochthonous	1
110030	30to39	2016-03-24	F	autochthonous	1
110030	30to39	2016-03-25	F	autochthonous	1
110030	30to39	2016-03-26	F	autochthonous	3
110030	30to39	2016-03-27	F	autochthonous	3
110030	30to39	2016-04-02	F	autochthonous	1
110030	30to39	2016-04-05	M	autochthonous	1
110030	30to39	2016-04-07	F	autochthonous	2
110030	30to39	2016-04-08	M	autochthonous	1
110030	30to39	2016-04-12	F	autochthonous	2
110030	30to39	2016-04-13	F	autochthonous	1
110030	30to39	2016-04-16	F	autochthonous	1
110030	30to39	2016-04-18	M	autochthonous	1
110030	30to39	2016-04-22	M	autochthonous	1
110030	30to39	2016-04-29	F	autochthonous	1
110030	30to39	2016-04-30	F	autochthonous	1
110030	30to39	2016-05-10	F	autochthonous	1
110030	30to39	2016-05-14	F	autochthonous	1
110030	30to39	2017-09-12	F	autochthonous	1
110030	30to39	2017-11-20	F	autochthonous	1
110030	30to39	2018-01-19	F	autochthonous	1
110030	30to39	2018-01-20	F	autochthonous	1
110030	30to39	2018-03-02	F	autochthonous	1
110030	30to39	2018-04-10	F	autochthonous	1
110030	30to39	2018-07-29	F	autochthonous	1
110030	30to39	2019-06-01	F	autochthonous	1
110030	30to39	2019-07-31	F	autochthonous	1
110030	30to39	2019-08-27	F	autochthonous	1
110030	30to39	2020-04-08	F	autochthonous	1
110030	30to39	2020-04-19	F	autochthonous	1
110030	30to39	2020-06-05	F	autochthonous	1
110030	30to39	2021-10-05	F	autochthonous	1
110030	40to49	2016-02-10	M	autochthonous	1
110030	40to49	2016-02-11	F	autochthonous	1
110030	40to49	2016-02-26	F	autochthonous	2
110030	40to49	2016-02-28	F	autochthonous	2
110030	40to49	2016-03-04	F	autochthonous	1
110030	40to49	2016-03-06	F	autochthonous	1
110030	40to49	2016-03-10	F	autochthonous	1
110030	40to49	2016-03-12	F	autochthonous	1
110030	40to49	2016-03-15	F	autochthonous	2
110030	40to49	2016-03-17	F	autochthonous	1
110030	40to49	2016-03-19	F	autochthonous	1
110030	40to49	2016-03-24	F	autochthonous	1
110030	40to49	2016-03-25	M	autochthonous	1
110030	40to49	2016-03-26	F	autochthonous	1
110030	40to49	2016-03-26	M	autochthonous	1
110030	40to49	2016-03-29	F	autochthonous	1
110030	40to49	2016-03-30	F	autochthonous	2
110030	40to49	2016-03-31	F	autochthonous	1
110030	40to49	2016-04-06	F	autochthonous	1
110030	40to49	2016-04-09	F	autochthonous	1
110030	40to49	2016-04-10	M	autochthonous	1
110030	40to49	2016-04-11	M	autochthonous	1
110030	40to49	2016-04-12	M	autochthonous	1
110030	40to49	2016-04-18	F	autochthonous	1
110030	40to49	2016-04-23	F	autochthonous	1
110030	40to49	2016-04-28	F	autochthonous	1
110030	40to49	2016-05-05	F	autochthonous	1
110030	40to49	2018-10-22	F	autochthonous	1
110030	40to49	2019-02-06	F	autochthonous	1
110030	40to49	2020-03-23	M	autochthonous	1
110030	40to49	2020-04-17	F	autochthonous	1
110030	40to49	2021-04-11	F	autochthonous	1
110030	50to59	2016-02-09	F	autochthonous	1
110030	50to59	2016-02-14	F	autochthonous	1
110030	50to59	2016-02-26	F	autochthonous	1
110030	50to59	2016-03-02	F	autochthonous	1
110030	50to59	2016-03-07	F	autochthonous	1
110030	50to59	2016-03-08	F	autochthonous	1
110030	50to59	2016-03-09	F	autochthonous	1
110030	50to59	2016-03-12	F	autochthonous	1
110030	50to59	2016-03-18	F	autochthonous	1
110030	50to59	2016-03-26	F	autochthonous	1
110030	50to59	2016-03-28	M	autochthonous	1
110030	50to59	2016-04-01	F	autochthonous	1
110030	50to59	2016-04-07	F	autochthonous	2
110030	50to59	2016-04-10	F	autochthonous	1
110030	50to59	2016-04-18	M	autochthonous	1
110030	50to59	2016-04-21	F	autochthonous	1
110030	50to59	2020-01-15	M	autochthonous	1
110030	60to69	2016-03-05	F	autochthonous	1
110030	60to69	2016-03-06	M	autochthonous	1
110030	60to69	2016-03-11	M	autochthonous	1
110030	60to69	2016-03-18	F	autochthonous	1
110030	60to69	2016-03-21	F	autochthonous	1
110030	60to69	2016-03-29	F	autochthonous	1
110030	60to69	2016-04-30	M	autochthonous	1
110030	60to69	2019-01-23	F	autochthonous	1
110030	60to69	2020-01-28	M	autochthonous	1
110030	70to79	2016-02-01	F	autochthonous	1
110030	70to79	2016-03-09	F	autochthonous	1
110030	70to79	2016-03-28	F	autochthonous	1
110030	70to79	2019-01-05	M	autochthonous	1
110030	>= 80	2016-02-29	M	autochthonous	1
110030	>= 80	2016-03-31	F	autochthonous	1
110037	15to19	2015-11-04	F	autochthonous	1
110037	20to29	2015-11-04	M	autochthonous	1
110080	20to29	2016-02-29	F	autochthonous	2
110080	40to49	2016-03-09	F	autochthonous	1
110092	0to4	2016-02-24	F	autochthonous	1
110092	5to9	2016-02-25	M	autochthonous	1
110092	10to14	2016-01-21	M	autochthonous	1
110092	10to14	2016-04-08	M	autochthonous	1
110092	15to19	2016-03-14	F	autochthonous	1
110092	20to29	2016-08-16	F	autochthonous	1
110092	30to39	2016-02-07	F	autochthonous	1
110092	30to39	2016-02-25	M	autochthonous	1
110092	30to39	2016-02-26	M	autochthonous	1
110092	30to39	2016-03-19	M	autochthonous	1
110092	40to49	2016-03-06	F	autochthonous	1
110092	40to49	2016-03-14	F	autochthonous	1
110092	40to49	2016-04-03	F	autochthonous	1
110092	50to59	2016-02-25	F	autochthonous	1
110092	50to59	2016-03-07	F	autochthonous	1
110092	50to59	2016-03-16	F	autochthonous	1
110094	20to29	2016-12-12	F	autochthonous	1
110110	20to29	2016-05-27	F	autochthonous	1
110110	20to29	2016-06-09	F	autochthonous	1
110120	0to4	2016-05-16	F	autochthonous	1
110120	0to4	2016-06-30	F	autochthonous	1
110120	0to4	2020-04-02	F	autochthonous	1
110145	15to19	2021-02-01	F	autochthonous	1
110145	20to29	2020-02-01	F	autochthonous	1
110145	30to39	2020-01-16	M	autochthonous	1
110149	30to39	2021-04-14	M	autochthonous	1
110170	30to39	2016-02-28	F	autochthonous	1
120010	15to19	2018-10-20	F	autochthonous	1
120010	30to39	2017-02-09	F	autochthonous	1
120020	0to4	2017-12-22	F	autochthonous	1
120020	0to4	2018-07-18	M	autochthonous	1
120020	0to4	2020-03-03	F	autochthonous	1
120020	0to4	2021-01-18	F	autochthonous	1
120020	0to4	2021-03-01	M	autochthonous	1
120020	0to4	2021-08-22	M	autochthonous	1
120020	0to4	2021-10-16	M	autochthonous	1
120020	5to9	2018-09-06	M	autochthonous	1
120020	5to9	2020-12-23	F	autochthonous	1
120020	5to9	2021-01-17	M	autochthonous	1
120020	5to9	2021-01-21	M	autochthonous	1
120020	5to9	2021-05-20	F	autochthonous	1
120020	5to9	2021-06-07	F	autochthonous	1
120020	5to9	2021-09-23	M	autochthonous	1
120020	10to14	2020-12-20	M	autochthonous	1
120020	10to14	2021-01-05	M	autochthonous	1
120020	10to14	2021-01-17	F	autochthonous	1
120020	10to14	2021-01-18	F	autochthonous	1
120020	10to14	2021-05-03	M	autochthonous	1
120020	10to14	2021-06-25	M	autochthonous	1
120020	10to14	2021-10-09	M	autochthonous	1
120020	15to19	2021-06-14	F	autochthonous	1
120020	15to19	2021-09-06	F	autochthonous	1
120020	15to19	2021-09-23	M	autochthonous	1
120020	15to19	2021-10-05	M	autochthonous	1
120020	15to19	2021-10-07	F	autochthonous	1
120020	15to19	2021-11-03	F	autochthonous	1
120020	20to29	2018-08-24	F	autochthonous	1
120020	20to29	2020-05-14	M	autochthonous	1
120020	20to29	2020-10-09	M	autochthonous	1
120020	20to29	2020-12-30	M	autochthonous	1
120020	20to29	2021-01-16	F	autochthonous	1
120020	20to29	2021-01-18	F	autochthonous	1
120020	20to29	2021-01-29	F	autochthonous	1
120020	20to29	2021-03-21	F	autochthonous	1
120020	20to29	2021-05-17	F	autochthonous	1
120020	20to29	2021-05-25	F	autochthonous	1
120020	20to29	2021-06-03	M	autochthonous	1
120020	20to29	2021-06-11	F	autochthonous	1
120020	20to29	2021-06-27	F	autochthonous	1
120020	20to29	2021-10-05	M	autochthonous	1
120020	20to29	2021-10-14	M	autochthonous	1
120020	20to29	2021-10-19	F	autochthonous	1
120020	30to39	2018-02-12	F	autochthonous	1
120020	30to39	2018-08-02	M	autochthonous	2
120020	30to39	2020-05-07	M	autochthonous	1
120020	30to39	2020-12-02	F	autochthonous	1
120020	30to39	2020-12-03	F	autochthonous	1
120020	30to39	2021-01-13	F	autochthonous	1
120020	30to39	2021-01-16	F	autochthonous	1
120020	30to39	2021-01-17	F	autochthonous	1
120020	30to39	2021-01-18	M	autochthonous	1
120020	30to39	2021-03-10	F	autochthonous	1
120020	30to39	2021-04-09	F	autochthonous	1
120020	30to39	2021-04-16	F	autochthonous	1
120020	30to39	2021-04-17	F	autochthonous	1
120020	30to39	2021-05-18	F	autochthonous	1
120020	30to39	2021-07-08	F	autochthonous	1
120020	30to39	2021-08-18	F	autochthonous	1
120020	30to39	2021-10-20	M	autochthonous	1
120020	40to49	2018-07-22	M	autochthonous	1
120020	40to49	2020-03-31	M	autochthonous	1
120020	40to49	2020-05-01	F	autochthonous	1
120020	40to49	2020-11-21	M	autochthonous	1
120020	40to49	2020-11-23	F	autochthonous	1
120020	40to49	2020-12-08	M	autochthonous	1
120020	40to49	2020-12-30	M	autochthonous	1
120020	40to49	2020-12-31	M	autochthonous	1
120020	40to49	2021-04-29	F	autochthonous	1
120020	40to49	2021-06-28	M	autochthonous	1
120020	40to49	2021-07-05	F	autochthonous	1
120020	40to49	2021-07-14	M	autochthonous	1
120020	40to49	2021-07-19	M	autochthonous	1
120020	40to49	2021-08-18	F	autochthonous	1
120020	40to49	2021-08-28	F	autochthonous	1
120020	40to49	2021-10-01	M	autochthonous	1
120020	40to49	2021-10-27	F	autochthonous	1
120020	50to59	2020-02-10	M	autochthonous	1
120020	50to59	2021-01-07	F	autochthonous	1
120020	50to59	2021-05-10	F	autochthonous	1
120020	50to59	2021-06-22	F	autochthonous	1
120020	50to59	2021-07-24	M	autochthonous	1
120020	50to59	2021-08-01	F	autochthonous	1
120020	50to59	2021-09-23	F	autochthonous	2
120020	50to59	2021-10-20	F	autochthonous	1
120020	60to69	2018-07-09	M	autochthonous	1
120020	60to69	2020-02-13	M	autochthonous	1
120020	60to69	2020-12-02	F	autochthonous	1
120020	60to69	2021-01-16	F	autochthonous	1
120020	60to69	2021-01-16	M	autochthonous	1
120020	60to69	2021-01-29	M	autochthonous	1
120020	60to69	2021-04-23	M	autochthonous	1
120020	60to69	2021-06-09	M	autochthonous	1
120020	70to79	2021-01-18	F	autochthonous	1
120020	70to79	2021-07-08	M	autochthonous	1
120020	70to79	2021-10-07	F	autochthonous	1
120020	70to79	2021-10-11	F	autochthonous	1
120025	0to4	2017-09-08	F	Undetermined	1
120025	40to49	2016-01-07	M	Undetermined	1
120025	50to59	2016-04-06	F	Undetermined	1
120030	5to9	2020-09-02	M	autochthonous	1
120030	5to9	2021-02-02	M	autochthonous	1
120030	5to9	2021-03-09	M	autochthonous	1
120030	5to9	2021-04-05	F	autochthonous	1
120030	10to14	2021-10-02	F	autochthonous	1
120030	15to19	2020-12-27	M	autochthonous	1
120030	20to29	2021-02-20	F	autochthonous	1
120030	30to39	2021-01-30	F	autochthonous	1
120030	30to39	2021-02-01	M	autochthonous	1
120030	30to39	2021-04-19	M	autochthonous	1
120030	30to39	2021-06-04	M	autochthonous	1
120030	30to39	2021-09-25	F	autochthonous	1
120030	30to39	2021-09-29	F	autochthonous	1
120030	40to49	2020-12-23	F	autochthonous	1
120030	60to69	2021-02-17	F	autochthonous	1
120033	0to4	2021-01-03	M	autochthonous	1
120033	0to4	2021-03-29	M	autochthonous	1
120033	0to4	2021-07-09	M	autochthonous	1
120033	5to9	2021-01-20	M	autochthonous	1
120033	5to9	2021-03-24	F	autochthonous	1
120033	5to9	2021-04-13	F	autochthonous	1
120033	5to9	2021-04-20	F	autochthonous	1
120033	5to9	2021-05-02	F	autochthonous	1
120033	5to9	2021-05-29	M	autochthonous	1
120033	10to14	2021-01-15	F	autochthonous	1
120033	10to14	2021-01-29	F	autochthonous	1
120033	10to14	2021-01-31	F	autochthonous	1
120033	10to14	2021-03-19	F	autochthonous	1
120033	10to14	2021-06-10	F	autochthonous	1
120033	15to19	2021-01-05	M	autochthonous	1
120033	15to19	2021-03-25	M	autochthonous	1
120033	15to19	2021-05-01	F	autochthonous	1
120033	15to19	2021-05-10	M	autochthonous	1
120033	15to19	2021-05-13	M	autochthonous	1
120033	15to19	2021-06-02	F	autochthonous	1
120033	20to29	2020-12-10	F	autochthonous	1
120033	20to29	2021-01-05	F	autochthonous	1
120033	20to29	2021-01-11	F	autochthonous	1
120033	20to29	2021-01-15	M	autochthonous	1
120033	20to29	2021-01-20	F	autochthonous	1
120033	20to29	2021-01-20	M	autochthonous	1
120033	20to29	2021-01-29	F	autochthonous	1
120033	20to29	2021-01-29	M	autochthonous	1
120033	20to29	2021-01-30	F	autochthonous	1
120033	20to29	2021-02-10	F	autochthonous	1
120033	20to29	2021-02-10	M	autochthonous	1
120033	20to29	2021-03-15	F	autochthonous	2
120033	20to29	2021-03-24	F	autochthonous	1
120033	20to29	2021-03-30	F	autochthonous	1
120033	20to29	2021-05-01	F	autochthonous	1
120033	20to29	2021-05-11	F	autochthonous	1
120033	20to29	2021-05-16	M	autochthonous	1
120033	20to29	2021-05-30	F	autochthonous	1
120033	20to29	2021-06-10	F	autochthonous	1
120033	20to29	2021-06-25	M	autochthonous	1
120033	30to39	2021-01-05	F	autochthonous	1
120033	30to39	2021-01-07	M	autochthonous	1
120033	30to39	2021-01-10	F	autochthonous	1
120033	30to39	2021-01-10	M	autochthonous	2
120033	30to39	2021-01-11	M	autochthonous	1
120033	30to39	2021-01-13	M	autochthonous	1
120033	30to39	2021-01-20	F	autochthonous	2
120033	30to39	2021-01-25	M	autochthonous	1
120033	30to39	2021-01-30	F	autochthonous	1
120033	30to39	2021-01-31	F	autochthonous	1
120033	30to39	2021-03-11	M	autochthonous	1
120033	30to39	2021-03-18	F	autochthonous	1
120033	30to39	2021-03-29	F	autochthonous	2
120033	30to39	2021-03-30	M	autochthonous	1
120033	30to39	2021-04-10	F	autochthonous	1
120033	30to39	2021-04-15	F	autochthonous	1
120033	30to39	2021-04-19	F	autochthonous	1
120033	30to39	2021-04-22	F	autochthonous	1
120033	30to39	2021-05-13	M	autochthonous	1
120033	30to39	2021-05-31	M	autochthonous	1
120033	30to39	2021-06-21	F	autochthonous	1
120033	30to39	2021-07-01	F	autochthonous	1
120033	40to49	2021-01-01	F	autochthonous	1
120033	40to49	2021-01-10	F	autochthonous	1
120033	40to49	2021-01-15	F	autochthonous	1
120033	40to49	2021-01-17	M	autochthonous	1
120033	40to49	2021-01-18	F	autochthonous	1
120033	40to49	2021-01-27	F	autochthonous	2
120033	40to49	2021-01-29	F	autochthonous	1
120033	40to49	2021-02-10	F	autochthonous	2
120033	40to49	2021-02-12	M	autochthonous	1
120033	40to49	2021-03-15	M	autochthonous	1
120033	40to49	2021-03-20	M	autochthonous	1
120033	40to49	2021-04-06	F	autochthonous	1
120033	40to49	2021-04-14	F	autochthonous	1
120033	40to49	2021-05-06	F	autochthonous	1
120033	40to49	2021-05-10	F	autochthonous	1
120033	40to49	2021-05-14	F	autochthonous	1
120033	40to49	2021-06-09	F	autochthonous	1
120033	40to49	2021-06-11	F	autochthonous	1
120033	40to49	2021-07-16	F	autochthonous	2
120033	40to49	2021-08-17	F	autochthonous	2
120033	40to49	2021-09-05	F	autochthonous	1
120033	50to59	2020-11-24	F	autochthonous	1
120033	50to59	2021-01-24	F	autochthonous	1
120033	50to59	2021-02-09	F	autochthonous	1
120033	50to59	2021-02-10	F	autochthonous	1
120033	50to59	2021-03-20	M	autochthonous	1
120033	50to59	2021-04-25	M	autochthonous	1
120033	50to59	2021-05-19	M	autochthonous	1
120033	50to59	2021-05-20	F	autochthonous	1
120033	50to59	2021-06-20	F	autochthonous	1
120033	50to59	2021-06-24	F	autochthonous	1
120033	50to59	2021-08-09	F	autochthonous	1
120033	50to59	2021-09-07	F	autochthonous	2
120033	60to69	2021-01-12	M	autochthonous	1
120033	60to69	2021-01-20	M	autochthonous	1
120033	60to69	2021-01-30	F	autochthonous	1
120033	60to69	2021-01-31	F	autochthonous	1
120033	60to69	2021-03-15	M	autochthonous	1
120033	60to69	2021-06-25	F	autochthonous	1
120033	60to69	2021-07-01	F	autochthonous	1
120033	60to69	2021-07-29	F	autochthonous	1
120033	70to79	2021-01-08	M	autochthonous	1
120033	70to79	2021-01-15	F	autochthonous	1
120033	70to79	2021-03-25	M	autochthonous	1
120033	70to79	2021-03-28	M	autochthonous	1
120033	70to79	2021-04-30	M	autochthonous	1
120033	>= 80	2021-01-05	M	autochthonous	1
120040	0to4	2016-01-18	M	autochthonous	1
120040	0to4	2016-04-06	F	autochthonous	1
120040	0to4	2016-04-20	M	autochthonous	1
120040	0to4	2016-04-23	F	autochthonous	1
120040	0to4	2016-08-02	M	autochthonous	1
120040	0to4	2016-12-08	M	autochthonous	1
120040	0to4	2016-12-13	F	autochthonous	1
120040	0to4	2018-08-12	F	autochthonous	1
120040	0to4	2018-10-19	F	autochthonous	1
120040	0to4	2018-12-29	M	autochthonous	1
120040	0to4	2019-01-14	M	autochthonous	1
120040	0to4	2019-02-04	F	autochthonous	1
120040	0to4	2019-02-10	F	autochthonous	1
120040	0to4	2020-07-15	F	autochthonous	1
120040	0to4	2020-10-21	M	autochthonous	1
120040	0to4	2020-12-03	M	autochthonous	1
120040	0to4	2021-05-11	M	autochthonous	1
120040	5to9	2018-06-23	M	autochthonous	1
120040	5to9	2019-01-02	F	autochthonous	1
120040	5to9	2019-01-10	M	autochthonous	1
120040	5to9	2019-02-10	M	autochthonous	1
120040	5to9	2020-02-28	F	autochthonous	1
120040	10to14	2016-03-04	F	autochthonous	1
120040	10to14	2016-05-13	M	autochthonous	1
120040	10to14	2019-01-08	F	autochthonous	1
120040	10to14	2019-02-28	F	autochthonous	1
120040	15to19	2016-01-29	F	autochthonous	1
120040	15to19	2016-02-11	F	autochthonous	1
120040	15to19	2016-02-14	F	autochthonous	1
120040	15to19	2016-03-01	F	autochthonous	1
120040	15to19	2016-03-09	M	autochthonous	1
120040	15to19	2016-04-11	F	autochthonous	1
120040	15to19	2016-04-20	F	autochthonous	1
120040	15to19	2016-05-02	F	autochthonous	2
120040	15to19	2019-01-14	F	autochthonous	1
120040	15to19	2020-11-17	F	autochthonous	1
120040	15to19	2020-11-22	F	autochthonous	1
120040	20to29	2016-01-11	M	autochthonous	1
120040	20to29	2016-01-13	F	autochthonous	1
120040	20to29	2016-01-26	F	autochthonous	1
120040	20to29	2016-01-29	F	autochthonous	1
120040	20to29	2016-02-02	F	autochthonous	2
120040	20to29	2016-02-07	F	autochthonous	1
120040	20to29	2016-02-11	F	autochthonous	1
120040	20to29	2016-02-19	F	autochthonous	1
120040	20to29	2016-02-22	F	autochthonous	1
120040	20to29	2016-02-23	F	autochthonous	1
120040	20to29	2016-02-24	F	autochthonous	2
120040	20to29	2016-02-26	F	autochthonous	1
120040	20to29	2016-02-26	M	autochthonous	2
120040	20to29	2016-02-27	F	autochthonous	1
120040	20to29	2016-03-02	M	autochthonous	1
120040	20to29	2016-03-03	F	autochthonous	1
120040	20to29	2016-03-08	F	autochthonous	1
120040	20to29	2016-03-11	F	autochthonous	1
120040	20to29	2016-03-26	F	autochthonous	1
120040	20to29	2016-03-27	F	autochthonous	1
120040	20to29	2016-03-31	M	autochthonous	1
120040	20to29	2016-04-05	F	autochthonous	2
120040	20to29	2016-04-06	F	autochthonous	1
120040	20to29	2016-04-06	M	autochthonous	1
120040	20to29	2016-04-09	F	autochthonous	1
120040	20to29	2016-04-12	M	autochthonous	1
120040	20to29	2016-04-18	F	autochthonous	1
120040	20to29	2016-04-19	M	autochthonous	1
120040	20to29	2016-04-22	F	autochthonous	1
120040	20to29	2016-04-26	F	autochthonous	1
120040	20to29	2016-04-27	F	autochthonous	1
120040	20to29	2016-05-15	F	autochthonous	1
120040	20to29	2016-06-19	F	autochthonous	1
120040	20to29	2017-01-20	F	autochthonous	2
120040	20to29	2017-02-10	F	autochthonous	1
120040	20to29	2018-05-24	F	autochthonous	1
120040	20to29	2018-07-02	F	autochthonous	1
120040	20to29	2019-01-11	F	autochthonous	1
120040	20to29	2019-02-05	F	autochthonous	1
120040	20to29	2019-02-18	M	autochthonous	1
120040	20to29	2020-02-22	F	autochthonous	1
120040	20to29	2020-07-06	M	autochthonous	1
120040	20to29	2021-01-01	F	autochthonous	1
120040	20to29	2021-01-11	F	autochthonous	1
120040	20to29	2021-03-06	F	autochthonous	1
120040	30to39	2016-01-31	F	autochthonous	1
120040	30to39	2016-02-07	F	autochthonous	1
120040	30to39	2016-02-08	F	autochthonous	1
120040	30to39	2016-02-21	F	autochthonous	1
120040	30to39	2016-02-26	F	autochthonous	1
120040	30to39	2016-02-28	F	autochthonous	1
120040	30to39	2016-03-06	F	autochthonous	1
120040	30to39	2016-03-10	F	autochthonous	1
120040	30to39	2016-03-23	F	autochthonous	1
120040	30to39	2016-03-29	M	autochthonous	1
120040	30to39	2016-04-01	F	autochthonous	1
120040	30to39	2016-04-01	M	autochthonous	1
120040	30to39	2016-04-02	M	autochthonous	1
120040	30to39	2016-04-03	F	autochthonous	1
120040	30to39	2016-04-08	F	autochthonous	1
120040	30to39	2016-04-10	F	autochthonous	1
120040	30to39	2016-04-16	M	autochthonous	1
120040	30to39	2016-04-17	F	autochthonous	1
120040	30to39	2016-04-18	F	autochthonous	1
120040	30to39	2016-04-22	F	autochthonous	1
120040	30to39	2016-06-05	M	autochthonous	1
120040	30to39	2016-12-14	F	autochthonous	1
120040	30to39	2018-08-07	F	autochthonous	1
120040	30to39	2019-01-05	F	Undetermined	1
120040	30to39	2019-01-17	F	autochthonous	1
120040	30to39	2019-01-20	M	autochthonous	1
120040	30to39	2019-01-24	F	autochthonous	1
120040	30to39	2019-02-12	F	autochthonous	1
120040	30to39	2019-02-14	F	autochthonous	1
120040	30to39	2020-02-29	F	autochthonous	1
120040	30to39	2020-11-07	F	autochthonous	1
120040	30to39	2020-11-17	M	autochthonous	1
120040	30to39	2020-12-21	F	autochthonous	1
120040	30to39	2021-01-28	F	autochthonous	1
120040	40to49	2016-04-04	F	autochthonous	1
120040	40to49	2016-04-12	F	autochthonous	1
120040	40to49	2016-04-21	F	autochthonous	1
120040	40to49	2016-06-02	M	autochthonous	1
120040	40to49	2019-01-05	M	Undetermined	1
120040	40to49	2019-01-22	F	autochthonous	1
120040	40to49	2020-04-19	M	autochthonous	1
120040	40to49	2020-05-17	F	autochthonous	1
120040	40to49	2020-05-30	F	autochthonous	1
120040	40to49	2020-11-05	F	autochthonous	1
120040	40to49	2020-11-21	M	autochthonous	1
120040	40to49	2021-06-22	M	autochthonous	1
120040	50to59	2016-02-17	F	autochthonous	1
120040	50to59	2016-03-29	F	autochthonous	1
120040	50to59	2016-03-29	M	autochthonous	1
120040	50to59	2016-04-18	M	autochthonous	1
120040	50to59	2018-10-26	M	autochthonous	1
120040	50to59	2019-01-23	F	autochthonous	1
120040	50to59	2019-01-31	M	autochthonous	1
120040	50to59	2020-05-05	F	autochthonous	1
120040	50to59	2020-12-02	F	autochthonous	1
120040	60to69	2016-04-30	M	autochthonous	1
120040	70to79	2017-01-04	F	autochthonous	1
120042	0to4	2021-08-23	F	Undetermined	1
120042	15to19	2021-01-07	F	Undetermined	1
120042	20to29	2020-02-07	M	autochthonous	1
120042	30to39	2021-06-10	F	autochthonous	1
120060	0to4	2018-10-25	M	autochthonous	1
120060	0to4	2018-10-29	M	autochthonous	1
120060	0to4	2018-11-04	M	autochthonous	1
120060	0to4	2021-03-23	M	autochthonous	1
120060	0to4	2021-05-04	M	autochthonous	1
120060	0to4	2021-05-12	F	autochthonous	1
120060	5to9	2018-09-28	M	autochthonous	1
120060	5to9	2018-10-22	F	autochthonous	1
120060	5to9	2018-10-25	F	autochthonous	1
120060	5to9	2018-10-27	F	autochthonous	1
120060	5to9	2018-10-28	F	autochthonous	1
120060	5to9	2018-11-11	M	autochthonous	1
120060	5to9	2018-12-25	F	autochthonous	1
120060	5to9	2018-12-28	M	autochthonous	1
120060	5to9	2019-01-01	F	autochthonous	1
120060	5to9	2021-03-24	M	autochthonous	1
120060	5to9	2021-04-28	F	autochthonous	1
120060	10to14	2018-11-03	F	autochthonous	1
120060	10to14	2018-11-05	F	autochthonous	1
120060	10to14	2018-11-30	M	autochthonous	1
120060	10to14	2019-01-10	F	autochthonous	1
120060	10to14	2021-03-21	M	autochthonous	1
120060	15to19	2018-10-28	F	autochthonous	1
120060	15to19	2018-10-31	F	autochthonous	1
120060	15to19	2018-11-10	M	autochthonous	1
120060	15to19	2018-12-21	F	autochthonous	1
120060	15to19	2018-12-22	F	autochthonous	1
120060	15to19	2019-01-11	F	autochthonous	1
120060	15to19	2019-02-21	M	autochthonous	1
120060	15to19	2019-02-24	F	autochthonous	1
120060	15to19	2019-02-28	M	autochthonous	1
120060	15to19	2021-02-09	F	autochthonous	1
120060	15to19	2021-03-18	F	autochthonous	1
120060	15to19	2021-04-13	F	autochthonous	1
120060	15to19	2021-05-02	M	autochthonous	1
120060	20to29	2018-09-28	F	autochthonous	1
120060	20to29	2018-10-29	F	autochthonous	1
120060	20to29	2018-10-30	F	autochthonous	1
120060	20to29	2018-11-02	F	autochthonous	1
120060	20to29	2018-11-03	M	autochthonous	2
120060	20to29	2018-11-05	M	autochthonous	1
120060	20to29	2018-11-06	F	autochthonous	1
120060	20to29	2018-11-08	M	autochthonous	1
120060	20to29	2018-11-14	M	autochthonous	1
120060	20to29	2018-11-20	F	autochthonous	1
120060	20to29	2018-11-30	M	autochthonous	1
120060	20to29	2018-12-03	F	autochthonous	1
120060	20to29	2018-12-05	M	autochthonous	1
120060	20to29	2018-12-23	F	autochthonous	1
120060	20to29	2021-01-21	F	autochthonous	1
120060	20to29	2021-02-06	F	autochthonous	1
120060	20to29	2021-03-21	F	autochthonous	1
120060	20to29	2021-03-28	M	autochthonous	1
120060	20to29	2021-04-15	M	autochthonous	1
120060	20to29	2021-04-20	F	autochthonous	1
120060	20to29	2021-05-19	M	autochthonous	1
120060	30to39	2018-10-01	F	autochthonous	1
120060	30to39	2018-10-31	M	autochthonous	1
120060	30to39	2018-11-03	F	autochthonous	1
120060	30to39	2018-11-03	M	autochthonous	1
120060	30to39	2018-11-10	F	autochthonous	1
120060	30to39	2018-11-19	F	autochthonous	1
120060	30to39	2018-11-20	M	autochthonous	1
120060	30to39	2018-11-30	F	autochthonous	1
120060	30to39	2018-12-02	F	autochthonous	1
120060	30to39	2018-12-04	M	autochthonous	1
120060	30to39	2018-12-15	F	autochthonous	1
120060	30to39	2018-12-20	F	autochthonous	1
120060	30to39	2018-12-28	F	autochthonous	1
120060	30to39	2019-01-19	F	autochthonous	1
120060	30to39	2021-01-24	F	autochthonous	1
120060	30to39	2021-03-17	M	autochthonous	1
120060	30to39	2021-03-18	M	autochthonous	1
120060	30to39	2021-03-20	F	autochthonous	1
120060	30to39	2021-03-21	F	autochthonous	1
120060	30to39	2021-03-22	F	autochthonous	1
120060	30to39	2021-03-23	M	autochthonous	1
120060	30to39	2021-03-25	F	autochthonous	1
120060	30to39	2021-03-25	M	autochthonous	1
120060	30to39	2021-04-28	M	autochthonous	1
120060	30to39	2021-05-06	M	autochthonous	1
120060	30to39	2021-05-11	M	autochthonous	1
120060	40to49	2018-09-24	M	autochthonous	1
120060	40to49	2018-10-21	F	autochthonous	1
120060	40to49	2018-11-02	F	autochthonous	2
120060	40to49	2018-11-11	F	autochthonous	1
120060	40to49	2018-12-01	M	autochthonous	1
120060	40to49	2018-12-03	F	autochthonous	1
120060	40to49	2018-12-16	F	autochthonous	1
120060	40to49	2021-01-29	M	autochthonous	1
120060	40to49	2021-02-08	F	autochthonous	1
120060	40to49	2021-03-04	F	autochthonous	1
120060	40to49	2021-03-13	M	autochthonous	1
120060	40to49	2021-03-14	M	autochthonous	1
120060	40to49	2021-03-23	M	autochthonous	1
120060	40to49	2021-03-27	M	autochthonous	1
120060	40to49	2021-04-29	M	autochthonous	1
120060	40to49	2021-05-01	M	autochthonous	1
120060	40to49	2021-05-17	F	autochthonous	1
120060	50to59	2018-10-18	F	autochthonous	1
120060	50to59	2018-10-26	F	autochthonous	1
120060	50to59	2018-11-02	M	autochthonous	1
120060	50to59	2018-12-07	M	autochthonous	1
120060	50to59	2018-12-30	F	autochthonous	1
120060	50to59	2021-03-17	M	autochthonous	1
120060	50to59	2021-03-26	F	autochthonous	1
120060	50to59	2021-03-30	F	autochthonous	1
120060	60to69	2018-11-03	F	autochthonous	1
120060	60to69	2018-11-20	F	autochthonous	1
120060	60to69	2018-11-20	M	autochthonous	1
120060	60to69	2021-03-22	F	autochthonous	1
120060	60to69	2021-03-29	F	autochthonous	1
120060	70to79	2019-01-12	F	autochthonous	1
120060	70to79	2021-02-15	M	autochthonous	1
120060	70to79	2021-03-20	M	autochthonous	1
120060	>= 80	2018-10-25	F	autochthonous	1
120070	20to29	2016-11-18	F	autochthonous	1
120070	50to59	2021-01-04	F	Undetermined	1
120080	10to14	2020-11-15	M	autochthonous	1
120080	10to14	2020-11-18	F	autochthonous	1
120080	15to19	2020-11-24	F	autochthonous	1
120080	30to39	2016-02-23	F	autochthonous	1
120080	40to49	2020-11-18	F	autochthonous	1
120080	50to59	2020-12-11	M	autochthonous	1
120080	60to69	2020-11-08	F	autochthonous	1
130040	20to29	2016-09-12	F	autochthonous	1
130040	50to59	2017-04-15	F	autochthonous	1
130063	20to29	2021-05-10	F	autochthonous	1
130080	15to19	2016-12-02	F	autochthonous	1
130080	15to19	2017-01-27	F	autochthonous	1
130080	15to19	2017-01-31	F	autochthonous	1
130080	15to19	2017-02-17	F	autochthonous	1
130080	20to29	2016-11-05	F	autochthonous	1
130080	20to29	2016-11-25	F	autochthonous	1
130080	20to29	2017-02-20	F	autochthonous	1
130080	20to29	2017-03-06	F	autochthonous	1
130080	30to39	2016-11-10	F	autochthonous	1
130080	30to39	2016-12-16	F	autochthonous	1
130080	30to39	2017-01-26	F	autochthonous	1
130080	40to49	2017-03-03	M	autochthonous	1
130080	50to59	2016-08-25	M	autochthonous	1
130080	60to69	2016-12-12	M	autochthonous	1
130110	50to59	2017-05-15	F	autochthonous	1
130120	0to4	2021-08-14	F	autochthonous	1
130120	20to29	2017-11-25	F	autochthonous	1
130130	20to29	2021-06-26	M	autochthonous	1
130140	5to9	2021-07-04	M	autochthonous	1
130140	30to39	2021-06-29	F	autochthonous	1
130170	10to14	2021-10-03	M	autochthonous	1
130185	0to4	2016-03-10	F	autochthonous	1
130185	0to4	2016-05-08	M	autochthonous	1
130185	0to4	2016-06-03	F	autochthonous	1
130185	0to4	2016-06-09	F	autochthonous	1
130185	0to4	2016-07-20	M	autochthonous	1
130185	0to4	2016-08-30	F	autochthonous	1
130185	0to4	2016-11-24	M	autochthonous	1
130185	0to4	2017-04-04	F	autochthonous	1
130185	0to4	2018-01-19	M	autochthonous	1
130185	0to4	2018-02-14	F	autochthonous	1
130185	0to4	2018-07-09	M	autochthonous	1
130185	5to9	2016-02-24	F	autochthonous	1
130185	5to9	2016-06-03	F	autochthonous	1
130185	5to9	2016-06-12	M	autochthonous	1
130185	5to9	2016-08-10	F	autochthonous	1
130185	20to29	2016-04-05	F	autochthonous	1
130185	20to29	2017-04-09	F	autochthonous	1
130185	20to29	2017-06-01	F	autochthonous	2
130185	30to39	2016-03-10	F	autochthonous	1
130185	30to39	2016-03-14	F	autochthonous	1
130185	30to39	2016-03-18	F	autochthonous	1
130185	30to39	2016-09-17	M	autochthonous	1
130185	30to39	2017-01-17	F	autochthonous	1
130185	30to39	2017-02-21	F	autochthonous	1
130185	30to39	2017-05-06	F	autochthonous	1
130185	30to39	2017-05-23	F	autochthonous	1
130185	40to49	2017-02-18	F	autochthonous	1
130185	40to49	2017-05-17	F	autochthonous	1
130185	40to49	2021-11-04	M	Undetermined	1
130185	50to59	2017-05-08	M	autochthonous	1
130190	0to4	2021-05-17	M	autochthonous	1
130190	10to14	2018-04-05	F	autochthonous	1
130190	15to19	2018-03-09	M	autochthonous	1
130190	30to39	2018-02-01	F	autochthonous	1
130190	30to39	2021-04-03	F	autochthonous	1
130190	40to49	2018-03-09	F	autochthonous	1
130190	40to49	2018-04-01	F	autochthonous	1
130190	40to49	2018-04-04	F	autochthonous	1
130190	40to49	2019-06-03	M	autochthonous	1
130190	50to59	2018-03-11	F	autochthonous	1
130190	60to69	2018-03-09	F	autochthonous	1
130250	0to4	2016-04-16	F	autochthonous	1
130250	0to4	2016-09-14	F	autochthonous	1
130250	15to19	2017-03-25	F	autochthonous	1
130250	20to29	2016-03-20	F	Undetermined	1
130250	20to29	2016-12-27	F	autochthonous	1
130250	40to49	2017-03-08	F	autochthonous	1
130260	0to4	2016-01-24	F	autochthonous	1
130260	0to4	2016-01-25	F	autochthonous	1
130260	0to4	2016-01-26	F	Undetermined	1
130260	0to4	2016-01-27	M	autochthonous	1
130260	0to4	2016-02-01	F	autochthonous	1
130260	0to4	2016-02-03	F	autochthonous	1
130260	0to4	2016-02-06	M	autochthonous	1
130260	0to4	2016-02-09	F	autochthonous	1
130260	0to4	2016-02-10	F	autochthonous	1
130260	0to4	2016-02-15	M	autochthonous	2
130260	0to4	2016-02-16	F	autochthonous	1
130260	0to4	2016-02-17	F	autochthonous	1
130260	0to4	2016-02-18	M	autochthonous	2
130260	0to4	2016-02-19	F	autochthonous	1
130260	0to4	2016-02-20	M	autochthonous	2
130260	0to4	2016-02-21	F	autochthonous	1
130260	0to4	2016-02-24	F	autochthonous	1
130260	0to4	2016-02-24	M	autochthonous	1
130260	0to4	2016-02-25	F	autochthonous	1
130260	0to4	2016-02-25	M	autochthonous	1
130260	0to4	2016-02-27	F	autochthonous	1
130260	0to4	2016-02-29	F	autochthonous	1
130260	0to4	2016-03-01	F	autochthonous	1
130260	0to4	2016-03-03	F	autochthonous	1
130260	0to4	2016-03-03	M	autochthonous	1
130260	0to4	2016-03-04	M	autochthonous	1
130260	0to4	2016-03-05	F	autochthonous	1
130260	0to4	2016-03-05	M	autochthonous	2
130260	0to4	2016-03-06	F	autochthonous	1
130260	0to4	2016-03-07	F	autochthonous	1
130260	0to4	2016-03-11	M	autochthonous	1
130260	0to4	2016-03-14	M	autochthonous	1
130260	0to4	2016-03-15	F	autochthonous	2
130260	0to4	2016-03-16	M	autochthonous	1
130260	0to4	2016-03-20	M	autochthonous	1
130260	0to4	2016-03-27	F	autochthonous	1
130260	0to4	2016-03-28	F	autochthonous	1
130260	0to4	2016-03-30	M	autochthonous	2
130260	0to4	2016-03-31	F	autochthonous	3
130260	0to4	2016-03-31	M	autochthonous	1
130260	0to4	2016-04-02	M	autochthonous	1
130260	0to4	2016-04-03	M	autochthonous	1
130260	0to4	2016-04-04	M	autochthonous	1
130260	0to4	2016-04-06	M	autochthonous	2
130260	0to4	2016-04-08	F	autochthonous	1
130260	0to4	2016-04-09	F	autochthonous	1
130260	0to4	2016-04-09	M	autochthonous	1
130260	0to4	2016-04-10	F	autochthonous	1
130260	0to4	2016-04-12	F	autochthonous	2
130260	0to4	2016-04-13	F	autochthonous	2
130260	0to4	2016-04-13	M	autochthonous	1
130260	0to4	2016-04-14	F	autochthonous	1
130260	0to4	2016-04-14	M	autochthonous	1
130260	0to4	2016-04-15	F	autochthonous	3
130260	0to4	2016-04-16	F	autochthonous	2
130260	0to4	2016-04-17	F	autochthonous	1
130260	0to4	2016-04-17	M	autochthonous	1
130260	0to4	2016-04-18	M	autochthonous	2
130260	0to4	2016-04-19	M	autochthonous	1
130260	0to4	2016-04-20	F	autochthonous	2
130260	0to4	2016-04-20	M	autochthonous	1
130260	0to4	2016-04-23	F	autochthonous	1
130260	0to4	2016-04-24	F	autochthonous	1
130260	0to4	2016-04-25	F	autochthonous	1
130260	0to4	2016-04-26	F	autochthonous	1
130260	0to4	2016-04-27	M	autochthonous	1
130260	0to4	2016-04-28	F	autochthonous	2
130260	0to4	2016-04-28	M	autochthonous	1
130260	0to4	2016-05-01	M	autochthonous	2
130260	0to4	2016-05-04	F	autochthonous	1
130260	0to4	2016-05-07	M	autochthonous	1
130260	0to4	2016-05-09	F	autochthonous	2
130260	0to4	2016-05-09	M	autochthonous	1
130260	0to4	2016-05-11	M	autochthonous	1
130260	0to4	2016-05-14	F	autochthonous	2
130260	0to4	2016-05-14	M	autochthonous	1
130260	0to4	2016-05-15	F	autochthonous	1
130260	0to4	2016-05-15	M	autochthonous	1
130260	0to4	2016-05-16	M	autochthonous	1
130260	0to4	2016-05-18	F	autochthonous	1
130260	0to4	2016-05-19	F	autochthonous	2
130260	0to4	2016-05-19	M	autochthonous	1
130260	0to4	2016-05-20	F	autochthonous	3
130260	0to4	2016-05-21	F	autochthonous	1
130260	0to4	2016-05-22	M	autochthonous	1
130260	0to4	2016-05-23	F	autochthonous	1
130260	0to4	2016-05-23	M	autochthonous	3
130260	0to4	2016-05-24	M	autochthonous	1
130260	0to4	2016-05-25	F	autochthonous	1
130260	0to4	2016-05-27	M	autochthonous	1
130260	0to4	2016-05-29	F	autochthonous	2
130260	0to4	2016-05-29	M	autochthonous	2
130260	0to4	2016-05-30	M	autochthonous	1
130260	0to4	2016-05-31	F	autochthonous	1
130260	0to4	2016-06-02	F	autochthonous	1
130260	0to4	2016-06-02	M	autochthonous	1
130260	0to4	2016-06-06	F	autochthonous	1
130260	0to4	2016-06-09	F	autochthonous	1
130260	0to4	2016-06-11	F	autochthonous	1
130260	0to4	2016-06-12	M	autochthonous	1
130260	0to4	2016-06-16	M	autochthonous	1
130260	0to4	2016-06-19	F	autochthonous	1
130260	0to4	2016-06-19	M	autochthonous	1
130260	0to4	2016-06-20	M	autochthonous	1
130260	0to4	2016-06-21	F	autochthonous	1
130260	0to4	2016-06-21	M	Undetermined	1
130260	0to4	2016-06-22	F	autochthonous	1
130260	0to4	2016-06-23	M	autochthonous	2
130260	0to4	2016-06-24	F	autochthonous	1
130260	0to4	2016-06-25	F	autochthonous	1
130260	0to4	2016-06-29	M	autochthonous	1
130260	0to4	2016-07-01	F	autochthonous	1
130260	0to4	2016-07-01	F	Undetermined	1
130260	0to4	2016-07-01	M	autochthonous	2
130260	0to4	2016-07-04	M	autochthonous	1
130260	0to4	2016-07-05	F	autochthonous	1
130260	0to4	2016-07-08	F	autochthonous	1
130260	0to4	2016-07-08	M	autochthonous	2
130260	0to4	2016-07-09	F	autochthonous	1
130260	0to4	2016-07-10	F	autochthonous	1
130260	0to4	2016-07-12	F	autochthonous	1
130260	0to4	2016-07-13	M	autochthonous	2
130260	0to4	2016-07-15	F	autochthonous	1
130260	0to4	2016-07-18	F	autochthonous	1
130260	0to4	2016-07-19	M	autochthonous	2
130260	0to4	2016-07-20	M	autochthonous	1
130260	0to4	2016-07-21	M	autochthonous	1
130260	0to4	2016-07-24	F	autochthonous	1
130260	0to4	2016-07-25	F	autochthonous	2
130260	0to4	2016-07-27	F	Undetermined	1
130260	0to4	2016-07-27	M	autochthonous	1
130260	0to4	2016-08-03	M	autochthonous	1
130260	0to4	2016-08-07	F	autochthonous	1
130260	0to4	2016-08-13	M	autochthonous	1
130260	0to4	2016-08-15	M	autochthonous	1
130260	0to4	2016-08-18	M	autochthonous	1
130260	0to4	2016-08-20	M	autochthonous	1
130260	0to4	2016-08-25	M	autochthonous	1
130260	0to4	2016-08-26	M	autochthonous	1
130260	0to4	2016-09-13	M	autochthonous	1
130260	0to4	2016-09-16	F	autochthonous	1
130260	0to4	2016-09-19	F	autochthonous	1
130260	0to4	2016-09-22	M	autochthonous	1
130260	0to4	2016-09-25	F	autochthonous	1
130260	0to4	2016-09-25	M	autochthonous	1
130260	0to4	2016-09-26	F	autochthonous	1
130260	0to4	2016-10-15	M	autochthonous	1
130260	0to4	2016-10-17	F	autochthonous	1
130260	0to4	2016-10-22	M	autochthonous	2
130260	0to4	2016-10-23	M	autochthonous	1
130260	0to4	2016-10-27	M	autochthonous	1
130260	0to4	2016-11-03	F	autochthonous	1
130260	0to4	2016-11-06	M	autochthonous	1
130260	0to4	2016-11-07	M	autochthonous	1
130260	0to4	2016-11-08	M	autochthonous	1
130260	0to4	2016-11-11	M	autochthonous	1
130260	0to4	2016-11-14	M	autochthonous	1
130260	0to4	2016-11-15	M	autochthonous	1
130260	0to4	2016-11-18	M	autochthonous	1
130260	0to4	2016-11-24	F	autochthonous	1
130260	0to4	2016-11-27	M	autochthonous	1
130260	0to4	2016-11-28	F	autochthonous	2
130260	0to4	2016-12-01	M	autochthonous	1
130260	0to4	2016-12-03	F	autochthonous	1
130260	0to4	2016-12-06	F	autochthonous	1
130260	0to4	2016-12-08	F	autochthonous	1
130260	0to4	2016-12-08	M	autochthonous	1
130260	0to4	2016-12-14	M	autochthonous	1
130260	0to4	2016-12-16	M	autochthonous	1
130260	0to4	2016-12-22	F	autochthonous	1
130260	0to4	2016-12-23	M	autochthonous	3
130260	0to4	2016-12-24	F	autochthonous	1
130260	0to4	2016-12-25	F	autochthonous	1
130260	0to4	2016-12-25	M	autochthonous	1
130260	0to4	2016-12-26	M	autochthonous	2
130260	0to4	2016-12-28	M	autochthonous	1
130260	0to4	2017-01-07	F	autochthonous	1
130260	0to4	2017-01-07	M	autochthonous	1
130260	0to4	2017-01-11	F	autochthonous	1
130260	0to4	2017-02-10	M	autochthonous	1
130260	0to4	2017-02-13	M	autochthonous	1
130260	0to4	2017-02-15	F	autochthonous	1
130260	0to4	2017-02-18	F	autochthonous	1
130260	0to4	2017-03-19	F	autochthonous	1
130260	0to4	2017-03-23	M	autochthonous	1
130260	0to4	2017-03-28	F	autochthonous	1
130260	0to4	2017-03-29	F	autochthonous	1
130260	0to4	2017-04-02	F	autochthonous	1
130260	0to4	2017-04-25	F	autochthonous	1
130260	0to4	2017-05-08	M	autochthonous	1
130260	0to4	2017-05-14	F	autochthonous	1
130260	0to4	2017-05-28	M	autochthonous	1
130260	0to4	2017-07-06	M	autochthonous	1
130260	0to4	2017-07-09	M	autochthonous	1
130260	0to4	2017-08-06	F	autochthonous	1
130260	0to4	2017-08-09	M	autochthonous	1
130260	0to4	2017-08-11	M	autochthonous	1
130260	0to4	2017-08-15	M	autochthonous	1
130260	0to4	2017-08-23	M	autochthonous	1
130260	0to4	2017-11-09	F	autochthonous	1
130260	0to4	2017-12-01	F	autochthonous	1
130260	0to4	2018-03-01	M	autochthonous	1
130260	0to4	2018-03-13	M	autochthonous	1
130260	0to4	2018-03-21	M	autochthonous	1
130260	0to4	2018-03-24	F	autochthonous	1
130260	0to4	2018-03-30	F	autochthonous	1
130260	0to4	2018-04-11	F	autochthonous	1
130260	0to4	2018-06-29	M	autochthonous	1
130260	0to4	2018-07-20	M	Undetermined	1
130260	0to4	2018-08-18	M	autochthonous	1
130260	0to4	2019-03-25	F	autochthonous	1
130260	0to4	2019-04-16	F	autochthonous	1
130260	0to4	2019-04-30	F	autochthonous	1
130260	0to4	2019-05-28	M	autochthonous	1
130260	0to4	2019-06-10	F	autochthonous	1
130260	0to4	2019-06-18	M	autochthonous	1
130260	0to4	2020-01-21	F	autochthonous	1
130260	0to4	2020-06-13	F	autochthonous	1
130260	0to4	2020-06-27	F	autochthonous	1
130260	0to4	2020-09-01	M	autochthonous	1
130260	0to4	2020-09-24	M	autochthonous	1
130260	0to4	2020-10-26	F	autochthonous	1
130260	0to4	2020-12-24	F	autochthonous	1
130260	0to4	2021-03-07	F	autochthonous	1
130260	0to4	2021-04-27	M	autochthonous	1
130260	0to4	2021-06-06	M	autochthonous	1
130260	0to4	2021-06-18	F	autochthonous	1
130260	0to4	2021-07-08	F	autochthonous	1
130260	0to4	2021-07-25	F	autochthonous	1
130260	0to4	2021-08-27	M	autochthonous	1
130260	0to4	2021-09-26	M	autochthonous	1
130260	0to4	2021-11-19	M	autochthonous	1
130260	0to4	2021-11-21	M	autochthonous	1
130260	0to4	2021-11-29	F	autochthonous	2
130260	5to9	2016-01-19	M	Undetermined	1
130260	5to9	2016-01-29	M	autochthonous	1
130260	5to9	2016-02-10	F	autochthonous	1
130260	5to9	2016-02-11	M	autochthonous	1
130260	5to9	2016-02-13	F	autochthonous	1
130260	5to9	2016-02-15	F	autochthonous	1
130260	5to9	2016-02-15	M	autochthonous	1
130260	5to9	2016-02-17	M	autochthonous	1
130260	5to9	2016-02-20	F	autochthonous	3
130260	5to9	2016-02-21	M	autochthonous	1
130260	5to9	2016-02-23	F	autochthonous	1
130260	5to9	2016-02-23	M	autochthonous	1
130260	5to9	2016-02-24	F	autochthonous	1
130260	5to9	2016-02-25	F	autochthonous	1
130260	5to9	2016-02-26	F	autochthonous	2
130260	5to9	2016-03-01	M	autochthonous	1
130260	5to9	2016-03-03	M	autochthonous	1
130260	5to9	2016-03-04	M	autochthonous	1
130260	5to9	2016-03-05	M	autochthonous	1
130260	5to9	2016-03-11	F	autochthonous	1
130260	5to9	2016-03-13	F	autochthonous	1
130260	5to9	2016-03-13	M	autochthonous	1
130260	5to9	2016-03-14	F	autochthonous	1
130260	5to9	2016-03-15	M	autochthonous	1
130260	5to9	2016-03-16	F	autochthonous	1
130260	5to9	2016-03-18	M	autochthonous	1
130260	5to9	2016-03-20	F	autochthonous	1
130260	5to9	2016-03-20	M	autochthonous	1
130260	5to9	2016-03-22	M	autochthonous	1
130260	5to9	2016-03-28	M	autochthonous	1
130260	5to9	2016-03-29	M	autochthonous	1
130260	5to9	2016-03-30	M	autochthonous	1
130260	5to9	2016-03-31	F	autochthonous	1
130260	5to9	2016-03-31	M	autochthonous	1
130260	5to9	2016-04-01	M	autochthonous	1
130260	5to9	2016-04-02	F	autochthonous	1
130260	5to9	2016-04-06	M	autochthonous	1
130260	5to9	2016-04-09	M	autochthonous	1
130260	5to9	2016-04-13	F	autochthonous	2
130260	5to9	2016-04-14	M	autochthonous	2
130260	5to9	2016-04-15	F	autochthonous	2
130260	5to9	2016-04-15	M	autochthonous	1
130260	5to9	2016-04-16	F	autochthonous	2
130260	5to9	2016-04-16	M	autochthonous	1
130260	5to9	2016-04-18	F	autochthonous	2
130260	5to9	2016-04-22	F	autochthonous	1
130260	5to9	2016-04-22	M	autochthonous	2
130260	5to9	2016-04-23	M	autochthonous	1
130260	5to9	2016-04-24	F	autochthonous	1
130260	5to9	2016-04-26	F	autochthonous	1
130260	5to9	2016-04-28	M	autochthonous	2
130260	5to9	2016-04-29	M	autochthonous	1
130260	5to9	2016-04-30	F	autochthonous	1
130260	5to9	2016-05-01	F	autochthonous	1
130260	5to9	2016-05-01	M	autochthonous	2
130260	5to9	2016-05-02	F	autochthonous	3
130260	5to9	2016-05-04	F	autochthonous	2
130260	5to9	2016-05-05	F	autochthonous	1
130260	5to9	2016-05-06	M	autochthonous	2
130260	5to9	2016-05-07	F	autochthonous	1
130260	5to9	2016-05-08	M	autochthonous	1
130260	5to9	2016-05-11	M	autochthonous	2
130260	5to9	2016-05-12	F	autochthonous	1
130260	5to9	2016-05-13	M	autochthonous	1
130260	5to9	2016-05-14	F	autochthonous	2
130260	5to9	2016-05-14	M	autochthonous	1
130260	5to9	2016-05-16	F	autochthonous	2
130260	5to9	2016-05-16	M	autochthonous	1
130260	5to9	2016-05-18	M	autochthonous	1
130260	5to9	2016-05-21	F	autochthonous	1
130260	5to9	2016-05-22	M	autochthonous	1
130260	5to9	2016-05-23	M	autochthonous	1
130260	5to9	2016-05-24	F	autochthonous	1
130260	5to9	2016-05-29	F	autochthonous	2
130260	5to9	2016-05-30	M	autochthonous	1
130260	5to9	2016-05-31	F	autochthonous	1
130260	5to9	2016-06-01	F	autochthonous	1
130260	5to9	2016-06-03	M	autochthonous	1
130260	5to9	2016-06-06	F	autochthonous	1
130260	5to9	2016-06-06	M	Undetermined	1
130260	5to9	2016-06-07	F	autochthonous	1
130260	5to9	2016-06-08	F	autochthonous	1
130260	5to9	2016-06-09	M	autochthonous	2
130260	5to9	2016-06-15	F	autochthonous	2
130260	5to9	2016-06-17	M	autochthonous	1
130260	5to9	2016-06-18	F	autochthonous	1
130260	5to9	2016-06-18	M	autochthonous	2
130260	5to9	2016-06-19	F	autochthonous	1
130260	5to9	2016-06-19	M	autochthonous	1
130260	5to9	2016-06-20	F	autochthonous	1
130260	5to9	2016-06-22	F	autochthonous	1
130260	5to9	2016-06-22	M	autochthonous	1
130260	5to9	2016-06-23	M	autochthonous	1
130260	5to9	2016-06-25	M	autochthonous	1
130260	5to9	2016-06-27	M	autochthonous	1
130260	5to9	2016-06-29	F	autochthonous	1
130260	5to9	2016-07-06	F	autochthonous	1
130260	5to9	2016-07-09	F	autochthonous	1
130260	5to9	2016-07-09	M	autochthonous	1
130260	5to9	2016-07-11	F	autochthonous	1
130260	5to9	2016-07-12	F	autochthonous	1
130260	5to9	2016-07-14	F	autochthonous	2
130260	5to9	2016-07-15	M	autochthonous	1
130260	5to9	2016-07-17	F	autochthonous	1
130260	5to9	2016-07-22	M	autochthonous	2
130260	5to9	2016-07-30	F	autochthonous	1
130260	5to9	2016-07-30	M	autochthonous	1
130260	5to9	2016-08-03	M	autochthonous	1
130260	5to9	2016-08-09	M	autochthonous	1
130260	5to9	2016-08-10	M	autochthonous	1
130260	5to9	2016-08-11	F	autochthonous	1
130260	5to9	2016-08-14	F	autochthonous	1
130260	5to9	2016-08-16	M	autochthonous	1
130260	5to9	2016-09-16	M	autochthonous	1
130260	5to9	2016-09-17	M	autochthonous	1
130260	5to9	2016-10-09	M	autochthonous	1
130260	5to9	2016-10-29	F	autochthonous	1
130260	5to9	2016-11-06	M	autochthonous	1
130260	5to9	2016-11-09	M	autochthonous	1
130260	5to9	2016-11-29	F	autochthonous	1
130260	5to9	2016-12-03	M	autochthonous	1
130260	5to9	2016-12-15	F	autochthonous	1
130260	5to9	2016-12-17	F	autochthonous	1
130260	5to9	2016-12-25	F	autochthonous	1
130260	5to9	2017-02-02	M	autochthonous	1
130260	5to9	2017-02-08	F	autochthonous	1
130260	5to9	2017-03-14	M	autochthonous	1
130260	5to9	2017-03-22	F	autochthonous	1
130260	5to9	2017-03-25	M	autochthonous	1
130260	5to9	2017-03-28	F	autochthonous	1
130260	5to9	2017-03-31	M	autochthonous	2
130260	5to9	2017-04-01	F	autochthonous	1
130260	5to9	2017-04-03	M	autochthonous	1
130260	5to9	2017-04-08	M	autochthonous	1
130260	5to9	2017-04-16	F	autochthonous	1
130260	5to9	2017-06-30	M	autochthonous	1
130260	5to9	2017-12-11	M	autochthonous	1
130260	5to9	2017-12-12	F	autochthonous	1
130260	5to9	2018-01-05	M	autochthonous	1
130260	5to9	2018-02-21	F	autochthonous	1
130260	5to9	2018-03-04	F	autochthonous	1
130260	5to9	2018-03-12	F	autochthonous	1
130260	5to9	2018-03-16	F	autochthonous	1
130260	5to9	2018-03-22	F	autochthonous	1
130260	5to9	2018-03-25	F	autochthonous	1
130260	5to9	2018-04-09	F	autochthonous	1
130260	5to9	2018-06-12	F	Undetermined	1
130260	5to9	2018-07-03	F	autochthonous	1
130260	5to9	2018-07-14	M	autochthonous	1
130260	5to9	2019-06-04	M	autochthonous	1
130260	5to9	2019-06-09	F	autochthonous	1
130260	5to9	2020-06-13	F	autochthonous	1
130260	5to9	2020-07-01	F	autochthonous	1
130260	5to9	2020-07-01	M	autochthonous	1
130260	5to9	2020-07-02	M	autochthonous	1
130260	5to9	2020-10-26	F	autochthonous	1
130260	5to9	2021-03-08	M	autochthonous	1
130260	5to9	2021-04-01	M	autochthonous	1
130260	5to9	2021-07-26	M	autochthonous	1
130260	5to9	2021-08-03	F	autochthonous	1
130260	5to9	2021-08-06	M	autochthonous	1
130260	10to14	2016-01-06	M	autochthonous	1
130260	10to14	2016-01-10	F	Undetermined	1
130260	10to14	2016-01-13	F	Undetermined	1
130260	10to14	2016-01-17	M	autochthonous	1
130260	10to14	2016-01-20	F	autochthonous	1
130260	10to14	2016-01-21	F	Undetermined	1
130260	10to14	2016-01-29	F	autochthonous	2
130260	10to14	2016-01-31	F	autochthonous	1
130260	10to14	2016-01-31	M	autochthonous	1
130260	10to14	2016-02-01	F	autochthonous	2
130260	10to14	2016-02-02	M	autochthonous	3
130260	10to14	2016-02-03	F	autochthonous	1
130260	10to14	2016-02-03	M	autochthonous	2
130260	10to14	2016-02-04	F	autochthonous	1
130260	10to14	2016-02-04	M	autochthonous	2
130260	10to14	2016-02-05	F	autochthonous	1
130260	10to14	2016-02-07	F	autochthonous	1
130260	10to14	2016-02-08	F	autochthonous	3
130260	10to14	2016-02-12	M	autochthonous	1
130260	10to14	2016-02-13	F	autochthonous	1
130260	10to14	2016-02-14	F	autochthonous	1
130260	10to14	2016-02-16	M	autochthonous	1
130260	10to14	2016-02-18	F	autochthonous	2
130260	10to14	2016-02-19	F	autochthonous	1
130260	10to14	2016-02-20	F	autochthonous	1
130260	10to14	2016-02-23	F	autochthonous	1
130260	10to14	2016-02-24	F	autochthonous	3
130260	10to14	2016-02-25	F	autochthonous	1
130260	10to14	2016-02-25	M	autochthonous	1
130260	10to14	2016-02-26	F	autochthonous	1
130260	10to14	2016-02-27	F	autochthonous	2
130260	10to14	2016-02-27	M	autochthonous	1
130260	10to14	2016-02-28	M	autochthonous	1
130260	10to14	2016-02-29	M	autochthonous	1
130260	10to14	2016-03-02	M	autochthonous	2
130260	10to14	2016-03-03	F	autochthonous	2
130260	10to14	2016-03-04	F	autochthonous	1
130260	10to14	2016-03-07	F	autochthonous	1
130260	10to14	2016-03-07	M	autochthonous	2
130260	10to14	2016-03-08	M	autochthonous	1
130260	10to14	2016-03-09	F	autochthonous	1
130260	10to14	2016-03-09	M	autochthonous	1
130260	10to14	2016-03-10	M	autochthonous	1
130260	10to14	2016-03-12	F	autochthonous	1
130260	10to14	2016-03-13	F	autochthonous	1
130260	10to14	2016-03-13	M	autochthonous	1
130260	10to14	2016-03-15	F	autochthonous	2
130260	10to14	2016-03-16	F	autochthonous	1
130260	10to14	2016-03-16	M	autochthonous	1
130260	10to14	2016-03-17	F	autochthonous	1
130260	10to14	2016-03-19	F	Undetermined	1
130260	10to14	2016-03-20	F	autochthonous	1
130260	10to14	2016-03-21	F	autochthonous	1
130260	10to14	2016-03-23	F	autochthonous	1
130260	10to14	2016-03-25	M	autochthonous	1
130260	10to14	2016-03-26	M	autochthonous	1
130260	10to14	2016-03-27	M	autochthonous	2
130260	10to14	2016-03-28	M	autochthonous	1
130260	10to14	2016-03-29	M	autochthonous	1
130260	10to14	2016-03-30	F	autochthonous	1
130260	10to14	2016-03-31	F	autochthonous	1
130260	10to14	2016-03-31	M	autochthonous	1
130260	10to14	2016-04-02	F	autochthonous	1
130260	10to14	2016-04-02	M	autochthonous	2
130260	10to14	2016-04-03	M	autochthonous	1
130260	10to14	2016-04-06	F	autochthonous	2
130260	10to14	2016-04-07	F	autochthonous	1
130260	10to14	2016-04-07	M	autochthonous	1
130260	10to14	2016-04-08	F	autochthonous	1
130260	10to14	2016-04-08	M	autochthonous	2
130260	10to14	2016-04-09	M	autochthonous	1
130260	10to14	2016-04-10	M	autochthonous	1
130260	10to14	2016-04-11	F	autochthonous	2
130260	10to14	2016-04-11	M	autochthonous	2
130260	10to14	2016-04-12	F	autochthonous	1
130260	10to14	2016-04-13	F	autochthonous	1
130260	10to14	2016-04-14	F	autochthonous	1
130260	10to14	2016-04-14	M	autochthonous	2
130260	10to14	2016-04-15	F	autochthonous	1
130260	10to14	2016-04-16	F	autochthonous	1
130260	10to14	2016-04-16	M	autochthonous	2
130260	10to14	2016-04-17	F	autochthonous	3
130260	10to14	2016-04-18	F	autochthonous	1
130260	10to14	2016-04-19	F	autochthonous	1
130260	10to14	2016-04-19	M	autochthonous	2
130260	10to14	2016-04-20	F	autochthonous	2
130260	10to14	2016-04-22	F	autochthonous	1
130260	10to14	2016-04-22	M	autochthonous	1
130260	10to14	2016-04-23	F	autochthonous	1
130260	10to14	2016-04-23	M	autochthonous	1
130260	10to14	2016-04-24	F	autochthonous	2
130260	10to14	2016-04-24	M	autochthonous	2
130260	10to14	2016-04-25	F	autochthonous	1
130260	10to14	2016-04-25	M	autochthonous	2
130260	10to14	2016-04-26	M	autochthonous	1
130260	10to14	2016-04-28	F	autochthonous	1
130260	10to14	2016-04-28	M	autochthonous	3
130260	10to14	2016-04-29	F	autochthonous	1
130260	10to14	2016-04-30	F	autochthonous	2
130260	10to14	2016-04-30	M	autochthonous	1
130260	10to14	2016-05-01	M	autochthonous	1
130260	10to14	2016-05-03	F	autochthonous	2
130260	10to14	2016-05-04	F	autochthonous	1
130260	10to14	2016-05-05	F	autochthonous	1
130260	10to14	2016-05-07	F	autochthonous	1
130260	10to14	2016-05-07	M	autochthonous	2
130260	10to14	2016-05-08	F	autochthonous	1
130260	10to14	2016-05-09	F	autochthonous	1
130260	10to14	2016-05-09	M	autochthonous	1
130260	10to14	2016-05-11	F	autochthonous	3
130260	10to14	2016-05-12	M	autochthonous	2
130260	10to14	2016-05-13	M	autochthonous	1
130260	10to14	2016-05-15	F	autochthonous	1
130260	10to14	2016-05-17	F	autochthonous	1
130260	10to14	2016-05-18	F	autochthonous	1
130260	10to14	2016-05-18	M	autochthonous	1
130260	10to14	2016-05-19	F	autochthonous	2
130260	10to14	2016-05-21	F	autochthonous	1
130260	10to14	2016-05-21	M	autochthonous	2
130260	10to14	2016-05-23	F	autochthonous	2
130260	10to14	2016-05-23	M	autochthonous	1
130260	10to14	2016-05-24	F	autochthonous	1
130260	10to14	2016-05-25	F	autochthonous	2
130260	10to14	2016-05-28	F	autochthonous	1
130260	10to14	2016-05-28	M	autochthonous	1
130260	10to14	2016-05-29	F	autochthonous	3
130260	10to14	2016-05-29	M	autochthonous	1
130260	10to14	2016-05-30	F	autochthonous	1
130260	10to14	2016-05-31	F	autochthonous	1
130260	10to14	2016-06-02	F	autochthonous	1
130260	10to14	2016-06-04	F	autochthonous	1
130260	10to14	2016-06-05	M	autochthonous	1
130260	10to14	2016-06-07	F	autochthonous	1
130260	10to14	2016-06-08	F	autochthonous	1
130260	10to14	2016-06-09	F	autochthonous	2
130260	10to14	2016-06-10	F	autochthonous	1
130260	10to14	2016-06-13	M	autochthonous	1
130260	10to14	2016-06-16	F	autochthonous	1
130260	10to14	2016-06-16	F	Undetermined	1
130260	10to14	2016-06-17	F	Undetermined	1
130260	10to14	2016-06-18	M	autochthonous	1
130260	10to14	2016-06-19	F	autochthonous	1
130260	10to14	2016-06-20	F	autochthonous	1
130260	10to14	2016-06-21	F	autochthonous	1
130260	10to14	2016-06-22	M	autochthonous	1
130260	10to14	2016-06-23	F	autochthonous	3
130260	10to14	2016-06-24	F	autochthonous	1
130260	10to14	2016-06-24	M	autochthonous	1
130260	10to14	2016-06-25	M	autochthonous	1
130260	10to14	2016-06-26	F	autochthonous	1
130260	10to14	2016-06-26	M	autochthonous	1
130260	10to14	2016-07-07	F	Undetermined	1
130260	10to14	2016-07-07	M	autochthonous	1
130260	10to14	2016-07-09	M	autochthonous	1
130260	10to14	2016-07-14	F	autochthonous	1
130260	10to14	2016-07-14	M	autochthonous	1
130260	10to14	2016-07-18	F	autochthonous	1
130260	10to14	2016-07-22	F	autochthonous	1
130260	10to14	2016-07-23	F	autochthonous	1
130260	10to14	2016-07-23	M	autochthonous	1
130260	10to14	2016-07-24	F	autochthonous	2
130260	10to14	2016-07-27	M	autochthonous	2
130260	10to14	2016-07-31	M	autochthonous	1
130260	10to14	2016-08-10	F	autochthonous	1
130260	10to14	2016-08-15	M	autochthonous	1
130260	10to14	2016-08-18	M	autochthonous	1
130260	10to14	2016-09-27	F	autochthonous	1
130260	10to14	2016-10-13	F	autochthonous	1
130260	10to14	2016-10-25	M	autochthonous	1
130260	10to14	2016-12-07	M	autochthonous	1
130260	10to14	2016-12-09	M	autochthonous	1
130260	10to14	2016-12-16	M	autochthonous	1
130260	10to14	2016-12-26	M	autochthonous	1
130260	10to14	2017-01-04	F	autochthonous	1
130260	10to14	2017-02-08	F	autochthonous	1
130260	10to14	2017-03-13	F	autochthonous	1
130260	10to14	2017-03-24	M	autochthonous	1
130260	10to14	2017-03-26	F	autochthonous	1
130260	10to14	2017-03-27	F	autochthonous	2
130260	10to14	2017-04-01	F	autochthonous	1
130260	10to14	2017-04-01	M	autochthonous	1
130260	10to14	2017-04-06	M	autochthonous	1
130260	10to14	2017-04-09	F	autochthonous	1
130260	10to14	2017-05-01	F	autochthonous	1
130260	10to14	2017-05-04	M	Undetermined	1
130260	10to14	2017-05-27	M	autochthonous	1
130260	10to14	2017-06-19	M	autochthonous	1
130260	10to14	2017-07-04	M	autochthonous	1
130260	10to14	2017-07-19	M	autochthonous	1
130260	10to14	2017-07-20	M	autochthonous	1
130260	10to14	2017-07-30	M	autochthonous	1
130260	10to14	2017-08-03	M	autochthonous	1
130260	10to14	2017-08-20	M	autochthonous	1
130260	10to14	2017-11-17	F	autochthonous	1
130260	10to14	2017-12-06	M	autochthonous	1
130260	10to14	2018-01-26	M	autochthonous	1
130260	10to14	2018-02-18	F	autochthonous	1
130260	10to14	2018-03-05	F	autochthonous	1
130260	10to14	2018-03-21	M	autochthonous	1
130260	10to14	2018-03-22	M	autochthonous	1
130260	10to14	2018-03-24	M	autochthonous	1
130260	10to14	2018-07-03	M	autochthonous	1
130260	10to14	2018-07-12	F	autochthonous	1
130260	10to14	2018-07-18	F	autochthonous	1
130260	10to14	2018-08-16	F	Undetermined	1
130260	10to14	2018-08-28	F	autochthonous	1
130260	10to14	2019-02-01	M	autochthonous	1
130260	10to14	2020-06-24	M	autochthonous	1
130260	10to14	2020-09-23	M	autochthonous	1
130260	10to14	2021-01-20	M	Undetermined	1
130260	10to14	2021-05-20	M	autochthonous	1
130260	10to14	2021-06-26	F	autochthonous	1
130260	10to14	2021-07-11	F	autochthonous	1
130260	10to14	2021-11-16	F	autochthonous	1
130260	15to19	2016-01-01	F	autochthonous	1
130260	15to19	2016-01-02	F	Undetermined	1
130260	15to19	2016-01-04	F	Undetermined	1
130260	15to19	2016-01-07	M	Undetermined	1
130260	15to19	2016-01-11	M	autochthonous	1
130260	15to19	2016-01-11	M	Undetermined	1
130260	15to19	2016-01-13	M	Undetermined	1
130260	15to19	2016-01-16	M	Undetermined	1
130260	15to19	2016-01-17	M	Undetermined	1
130260	15to19	2016-01-18	M	autochthonous	1
130260	15to19	2016-01-19	F	Undetermined	1
130260	15to19	2016-01-20	F	autochthonous	1
130260	15to19	2016-01-20	F	Undetermined	1
130260	15to19	2016-01-22	F	Undetermined	1
130260	15to19	2016-01-23	F	Undetermined	1
130260	15to19	2016-01-23	M	Undetermined	1
130260	15to19	2016-01-24	M	autochthonous	1
130260	15to19	2016-01-25	F	Undetermined	1
130260	15to19	2016-01-25	M	autochthonous	1
130260	15to19	2016-01-26	F	autochthonous	1
130260	15to19	2016-01-26	F	Undetermined	1
130260	15to19	2016-01-26	M	Undetermined	2
130260	15to19	2016-01-27	F	autochthonous	1
130260	15to19	2016-01-27	M	autochthonous	1
130260	15to19	2016-01-28	F	Undetermined	1
130260	15to19	2016-01-29	F	autochthonous	2
130260	15to19	2016-01-29	F	Undetermined	1
130260	15to19	2016-01-31	F	autochthonous	2
130260	15to19	2016-01-31	F	Undetermined	1
130260	15to19	2016-01-31	M	autochthonous	1
130260	15to19	2016-02-01	F	autochthonous	1
130260	15to19	2016-02-01	M	autochthonous	2
130260	15to19	2016-02-02	F	autochthonous	1
130260	15to19	2016-02-02	F	Undetermined	1
130260	15to19	2016-02-02	M	autochthonous	1
130260	15to19	2016-02-03	F	autochthonous	1
130260	15to19	2016-02-04	M	autochthonous	1
130260	15to19	2016-02-07	M	autochthonous	2
130260	15to19	2016-02-08	F	autochthonous	2
130260	15to19	2016-02-09	M	autochthonous	1
130260	15to19	2016-02-10	F	autochthonous	1
130260	15to19	2016-02-11	F	autochthonous	1
130260	15to19	2016-02-12	F	autochthonous	1
[truncated: 90,600 more rows]
